# Supplementary material for: Pyrrolidine and oxazolidine ring transformations in proline and serine derivatives of α-hydroxyphosphonates induced by deoxyfluorinating reagents
Source: Royal Society of Chemistry journal article supplement (doi:10.1039/c8ra05186k), 2018-01-01
Supplement: c8ra05186k1.pdf [file c8ra05186k1.pdf]

## Supporting Information

### **Pyrrolidine and Oxazolidine Ring Transformations in Proline and Serine Derivatives of $\alpha$ -Hydroxyphosphonates Induced by Deoxyfluorinating Reagents**

Patrycja Kaczmarek,<sup>[a]</sup> Magdalena Rapp,\*<sup>[a]</sup> Henryk Koroniak<sup>[a]</sup>

<sup>[a]</sup>Faculty of Chemistry, Adam Mickiewicz University, Umultowska 89b, 60614 Poznan (Poland)

*e-mail address:* [magdrapp@amu.edu.pl](mailto:magdrapp@amu.edu.pl) (M. Rapp)

**<sup>1</sup>H, <sup>13</sup>C, <sup>31</sup>P and <sup>19</sup>F NMR Spectra of Compounds**

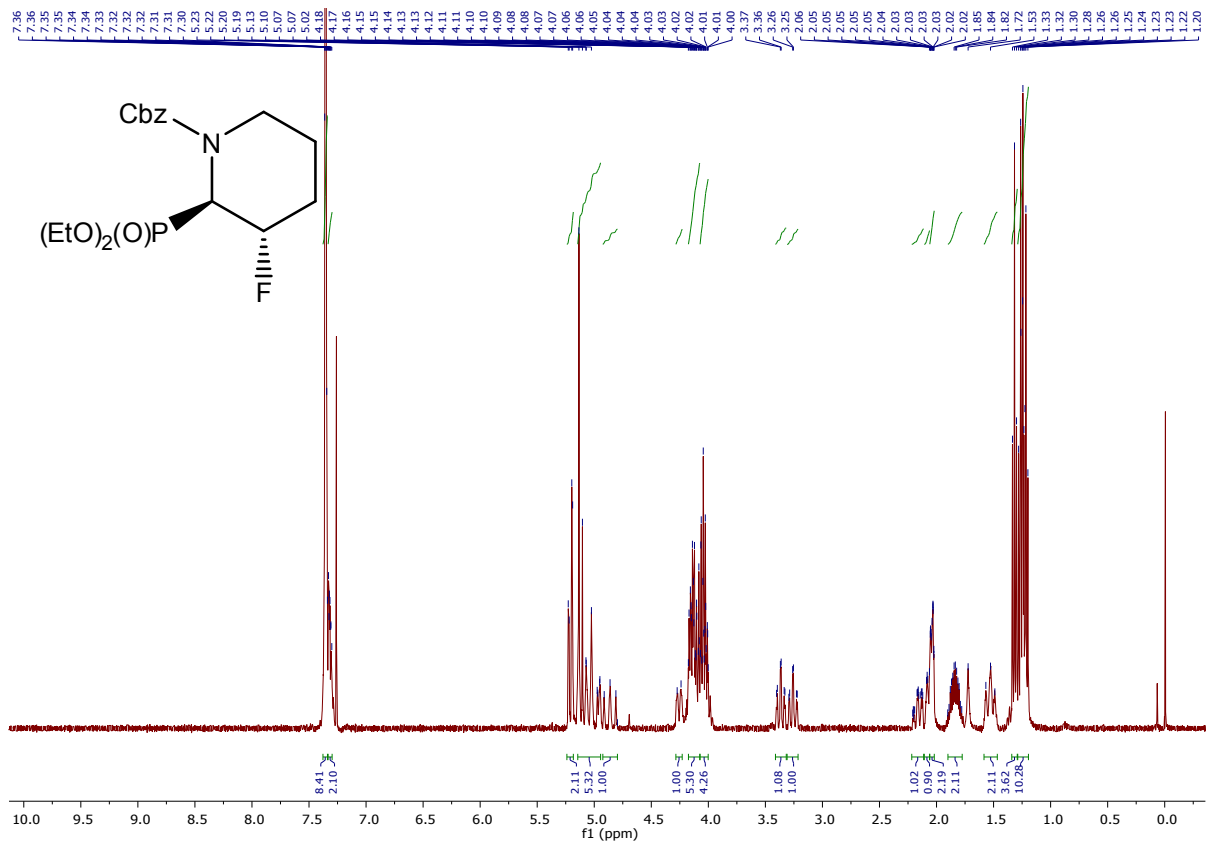

**<sup>1</sup>H NMR of 4**

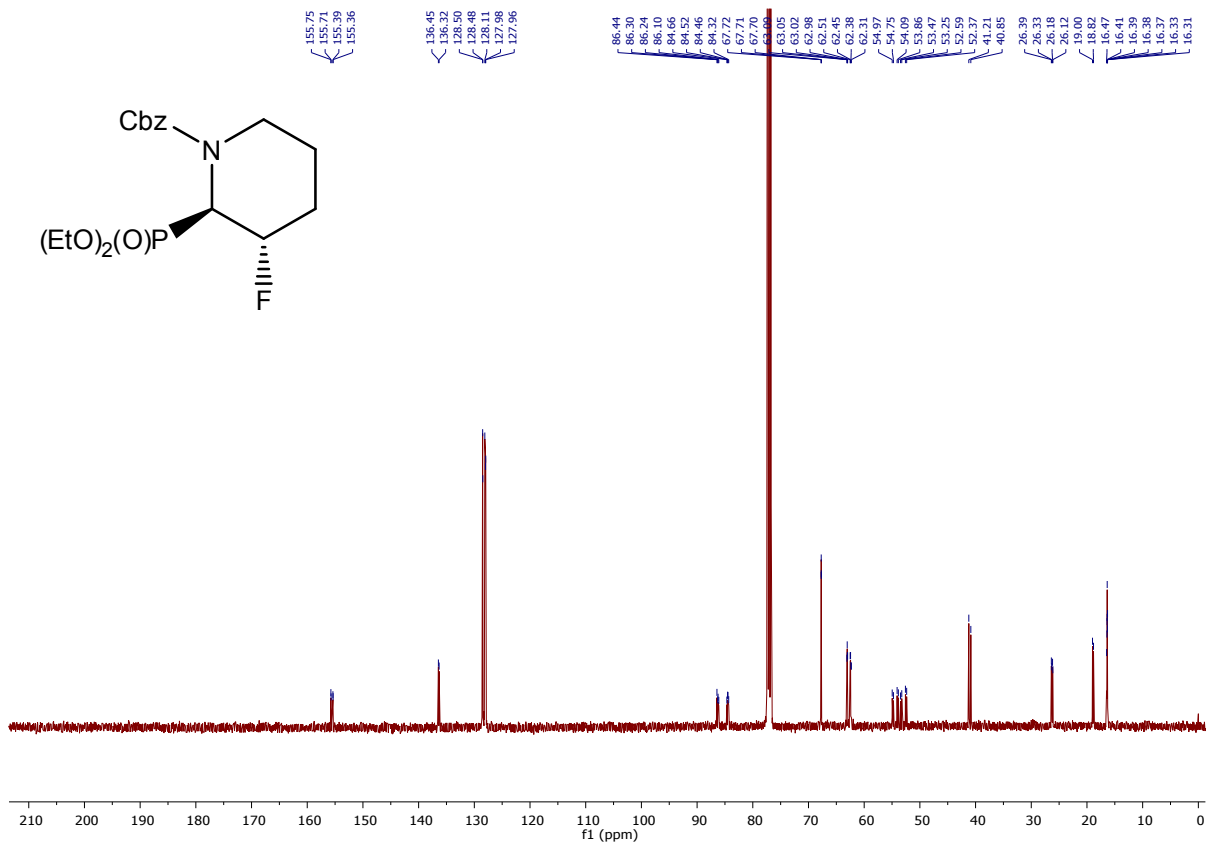

**<sup>13</sup>C NMR of 4**

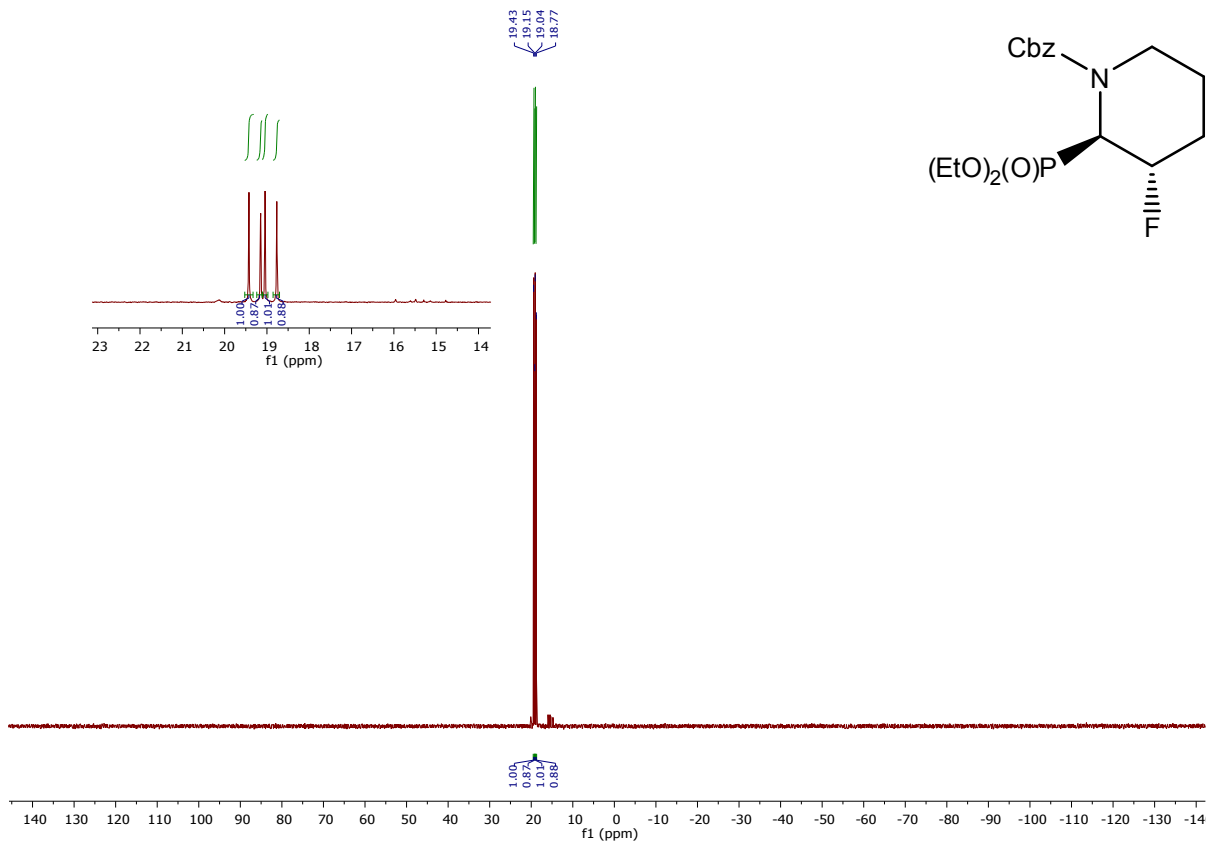

**$^{31}\text{P}\{^1\text{H}\}$  NMR of 4**

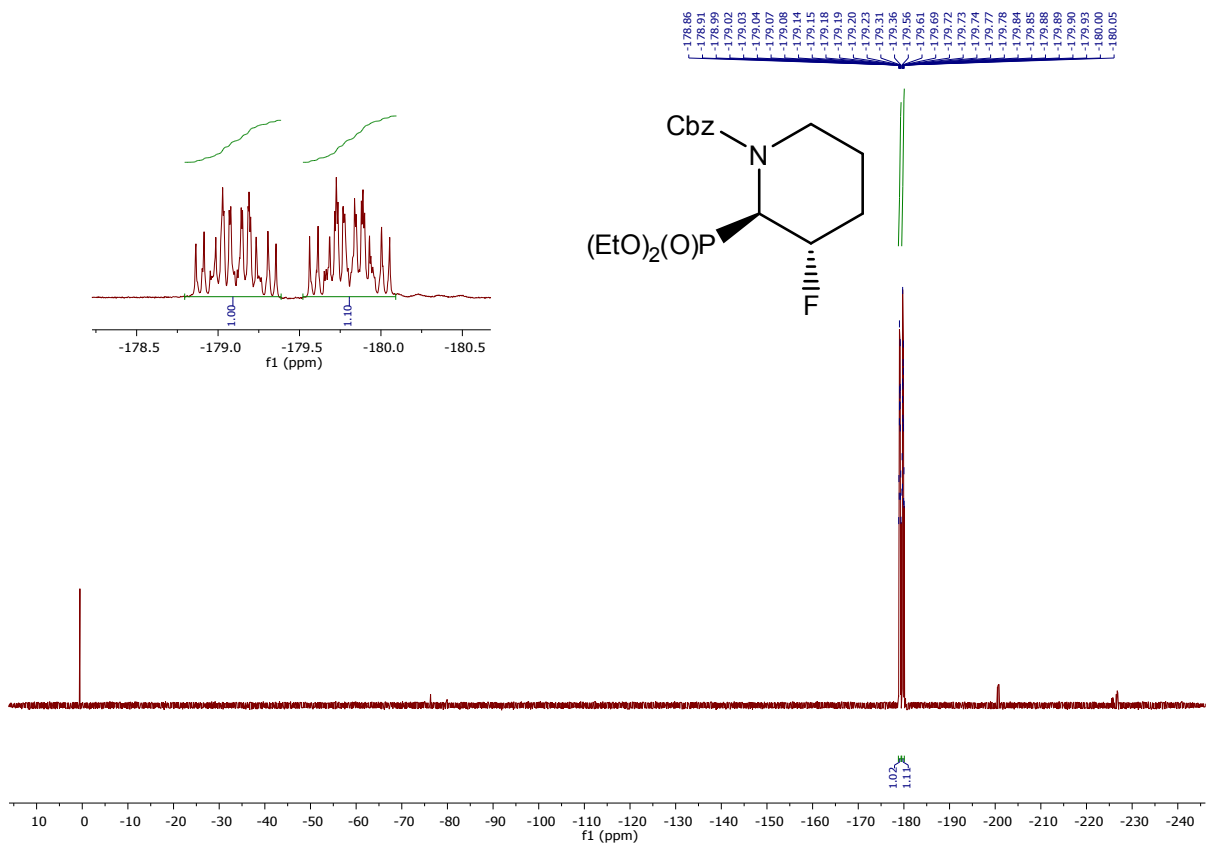

**$^{19}\text{F}$  NMR of 4**

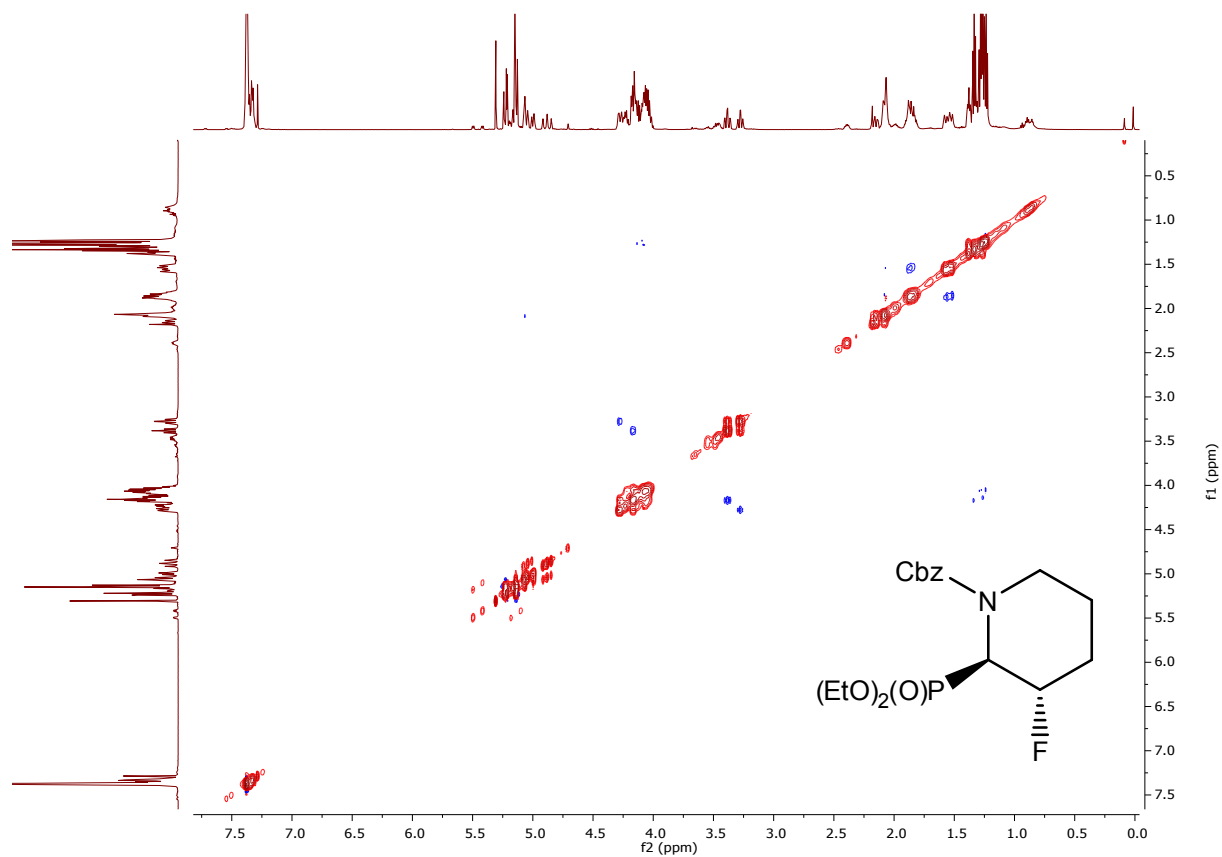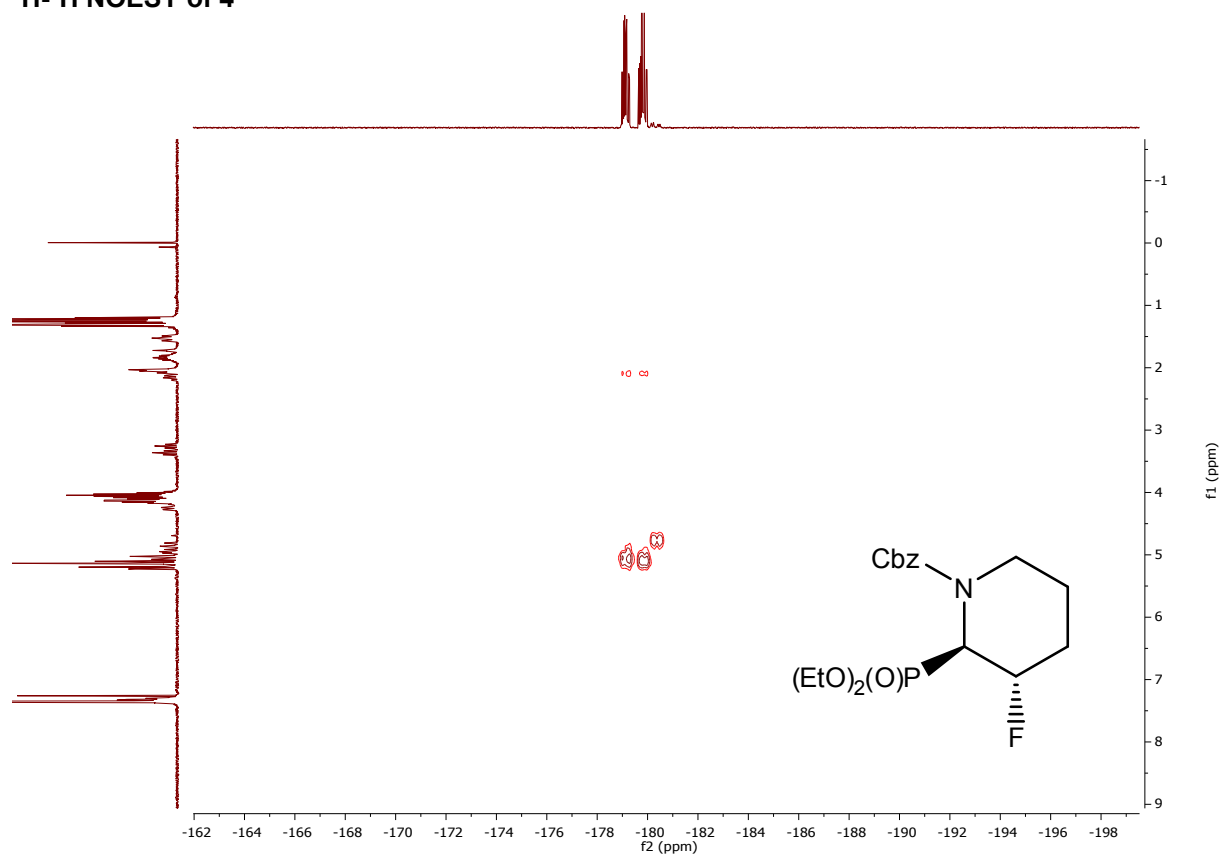

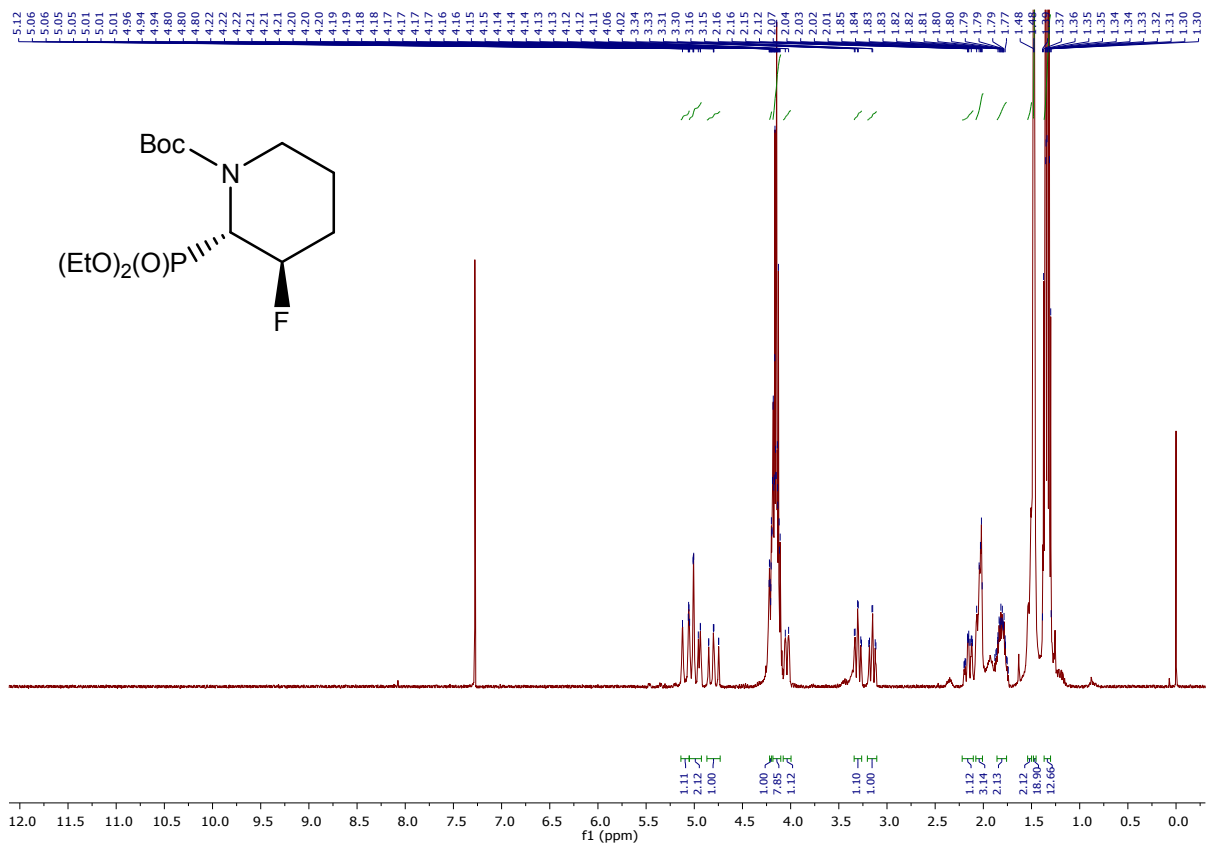

**<sup>1</sup>H NMR of 5**

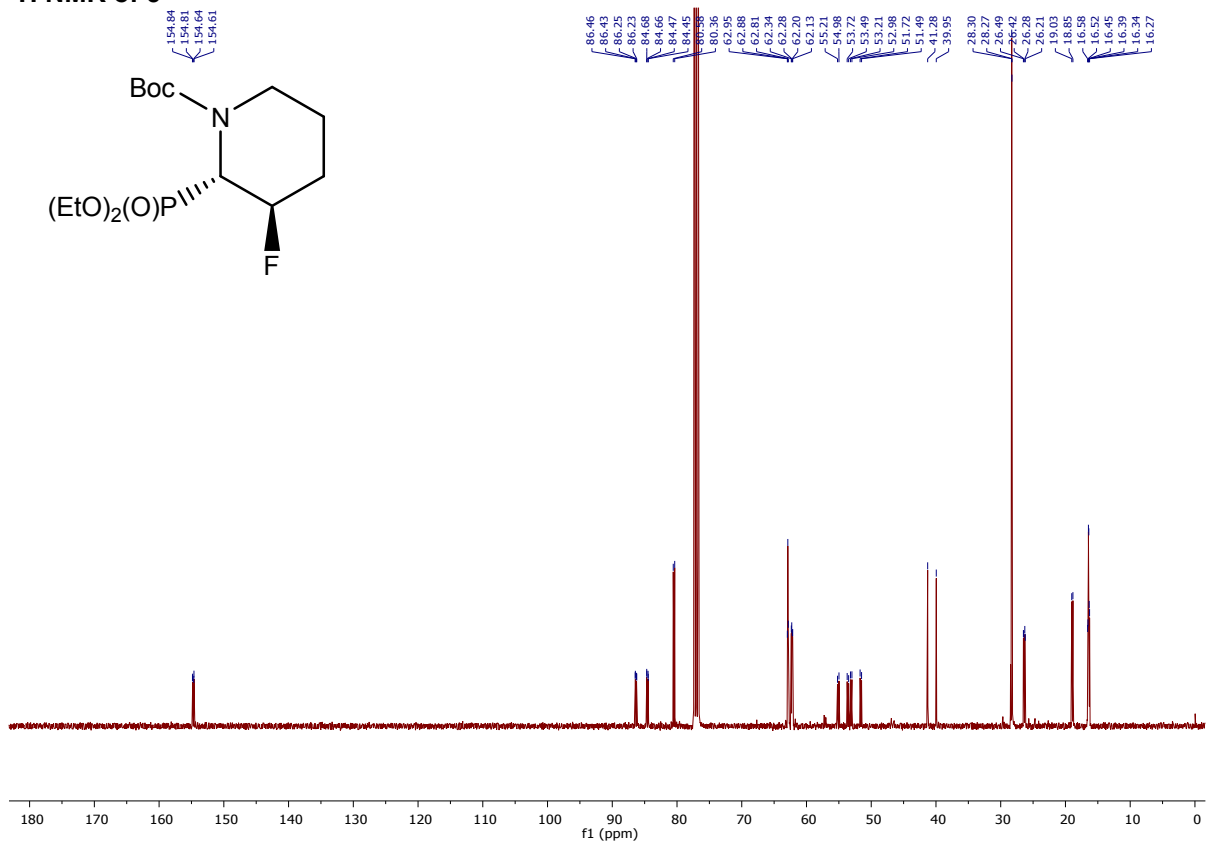

**<sup>13</sup>C NMR of 5**

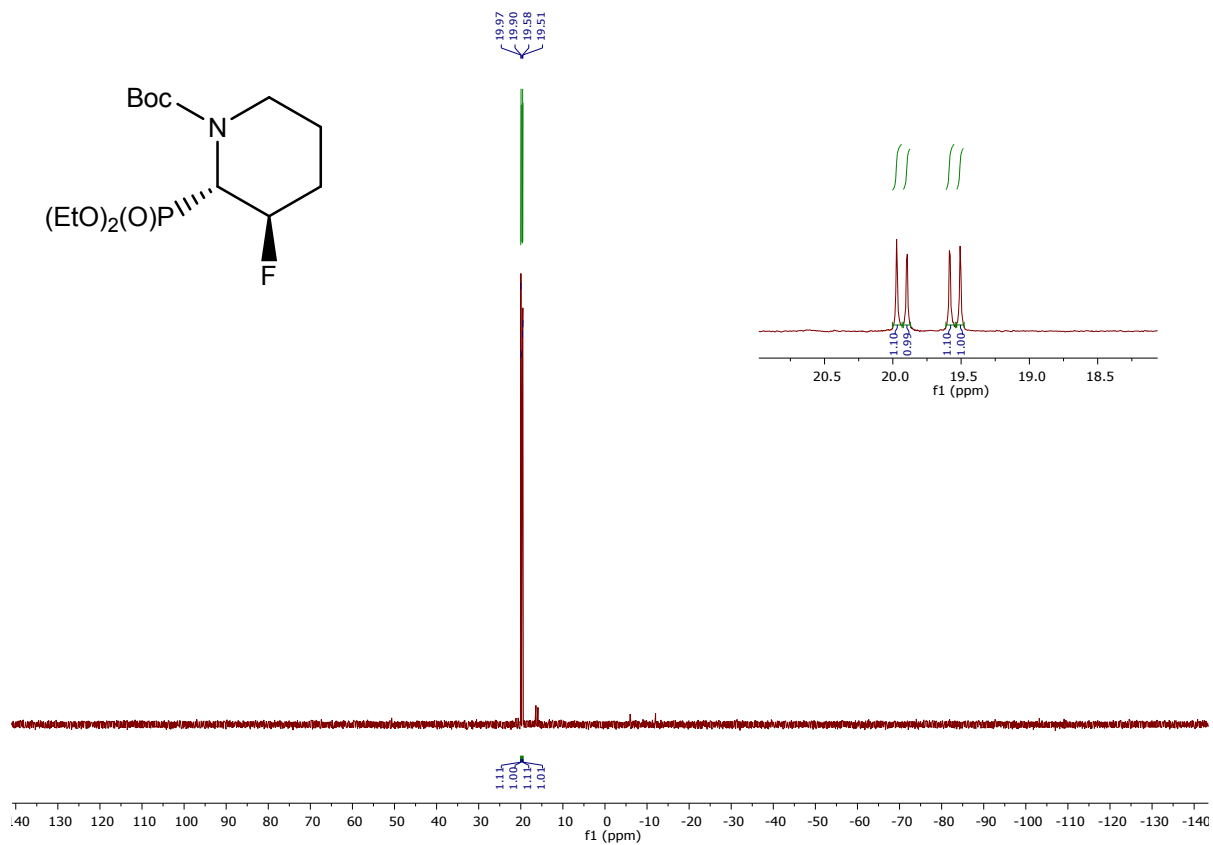

**$^{31}\text{P}\{^1\text{H}\}$  NMR of 5**

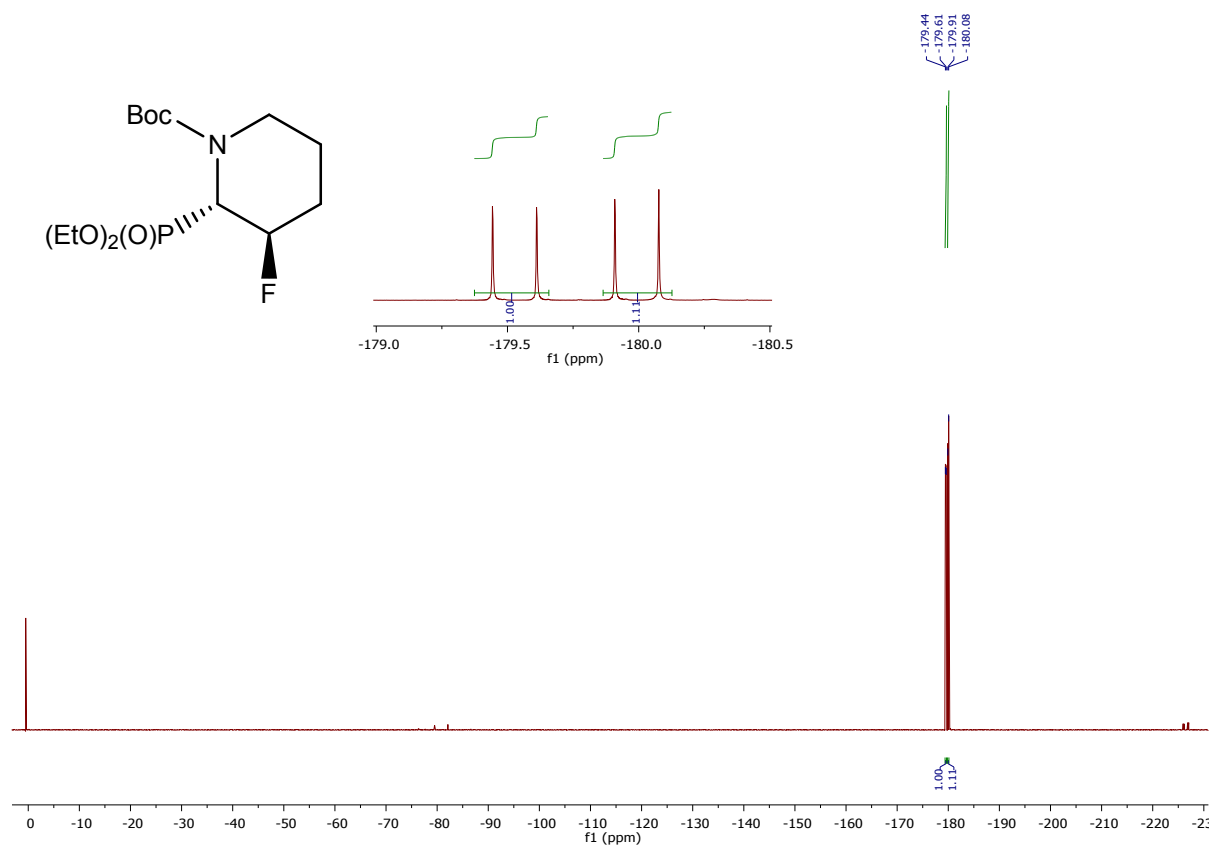

**$^{19}\text{F}\{^1\text{H}\}$  NMR of 5**

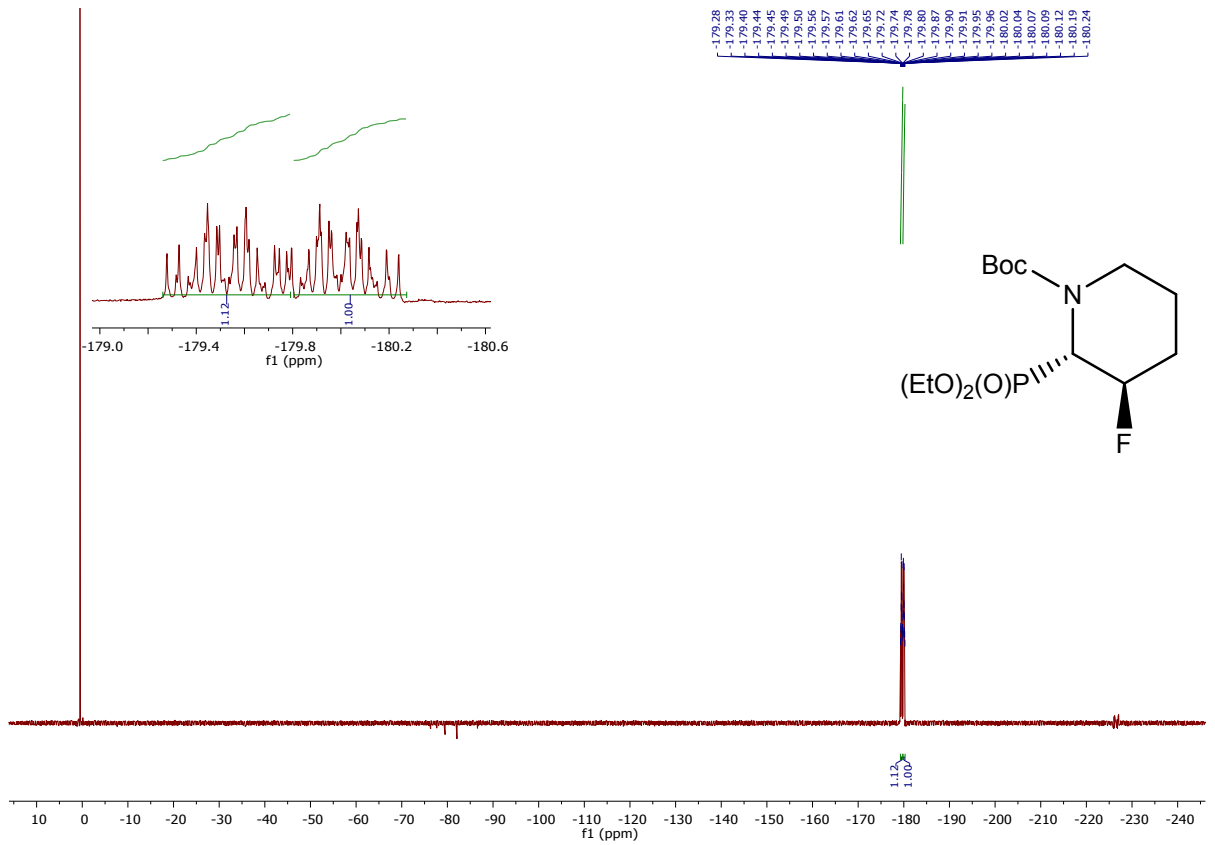

**<sup>19</sup>F NMR of 5**

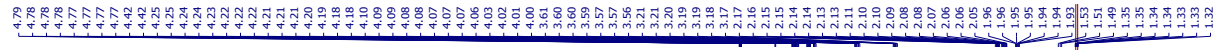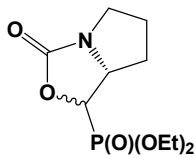

**<sup>1</sup>H NMR of 6a,b/7a,b**



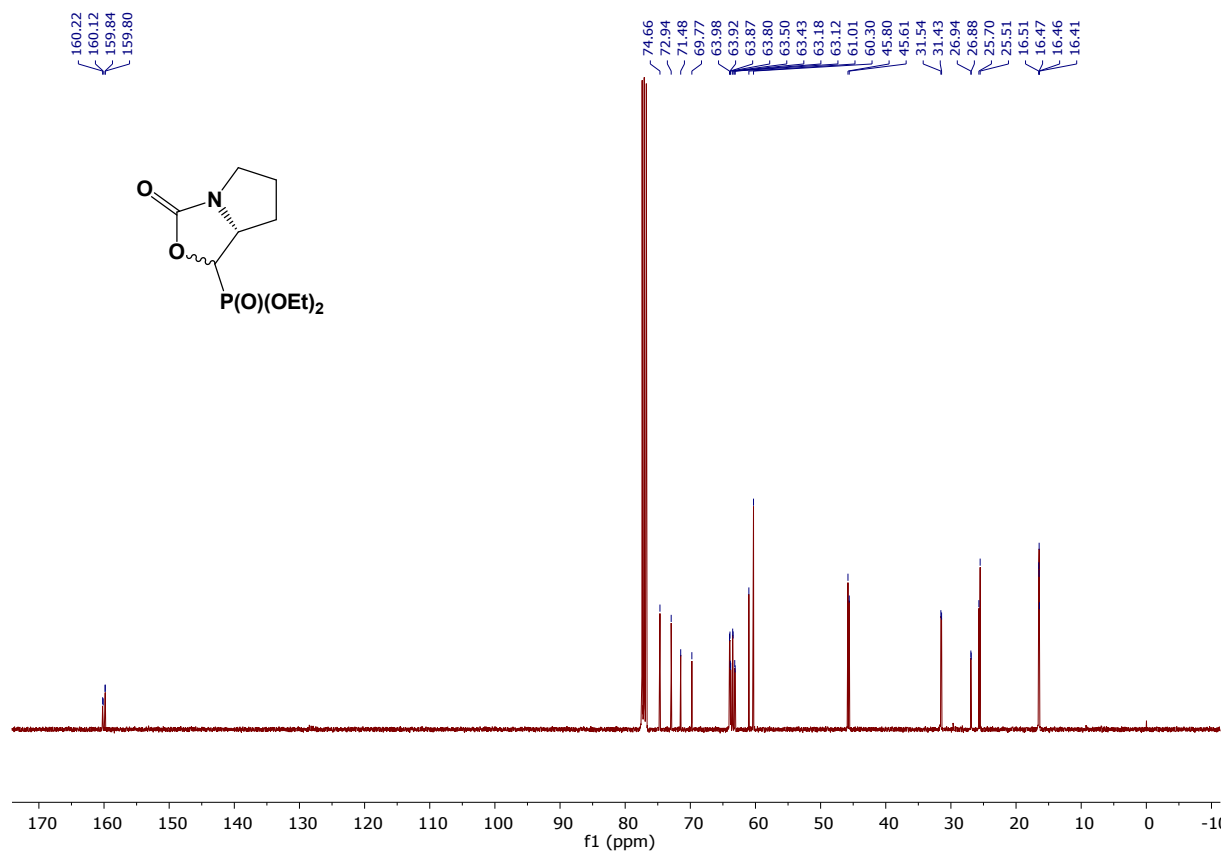

**<sup>13</sup>C NMR of 6a,b/7a,b**

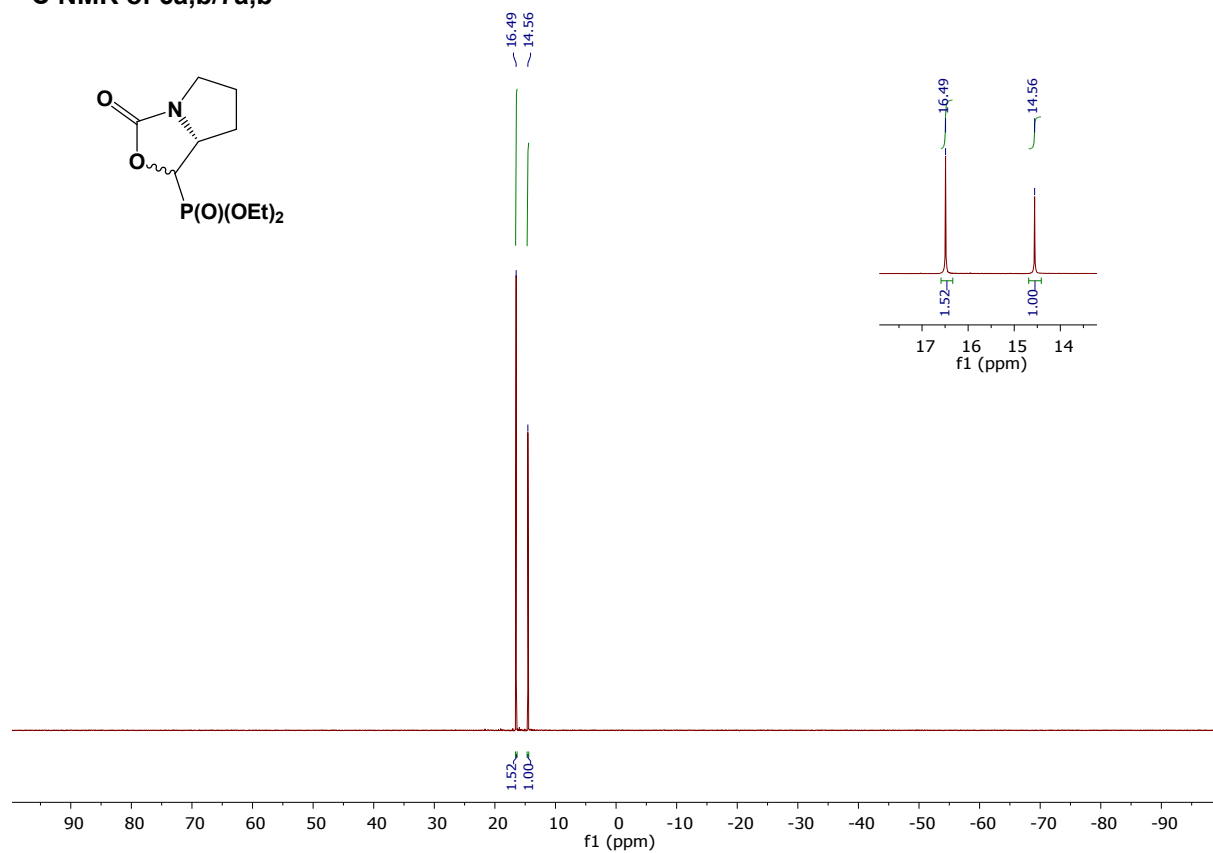

**<sup>31</sup>P{<sup>1</sup>H} NMR of 6a,b/7a,b**



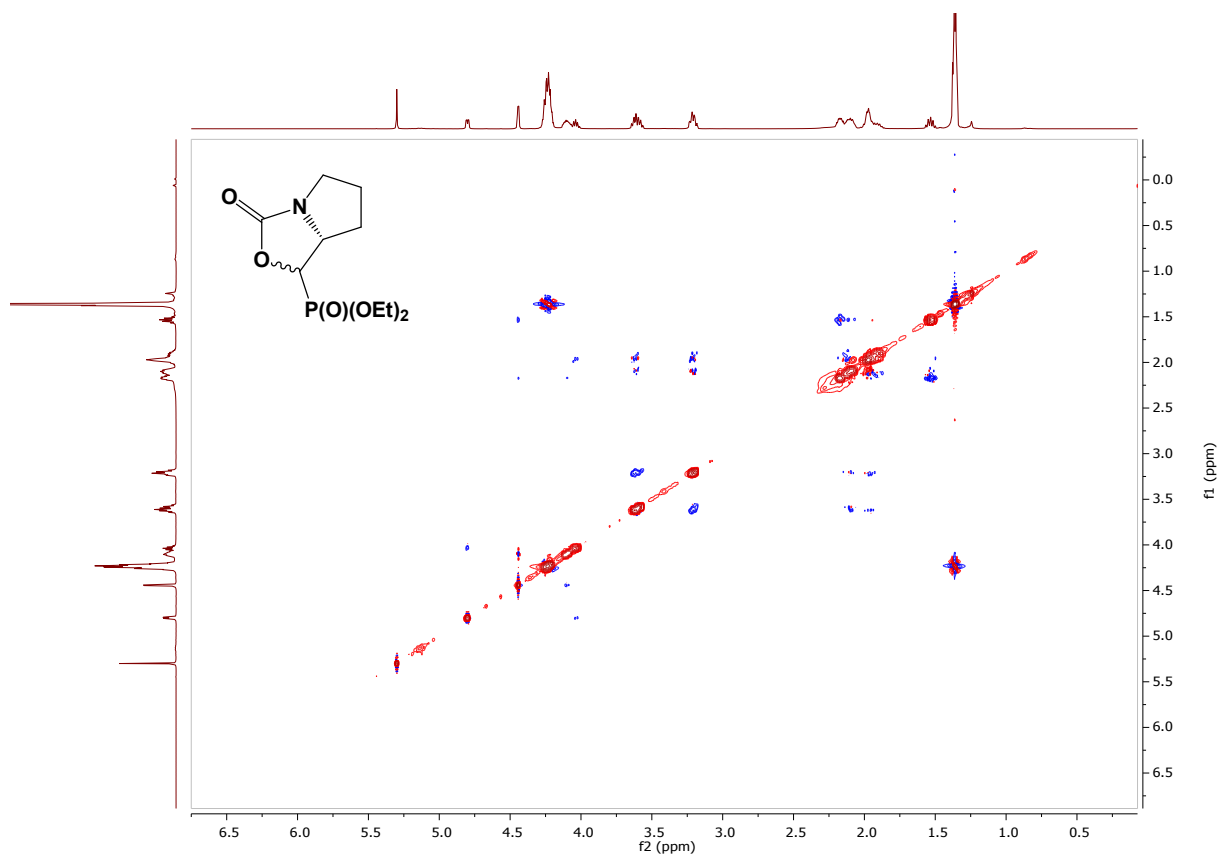

**<sup>1</sup>H-<sup>1</sup>H NOESY of 6a,b/7a,b**

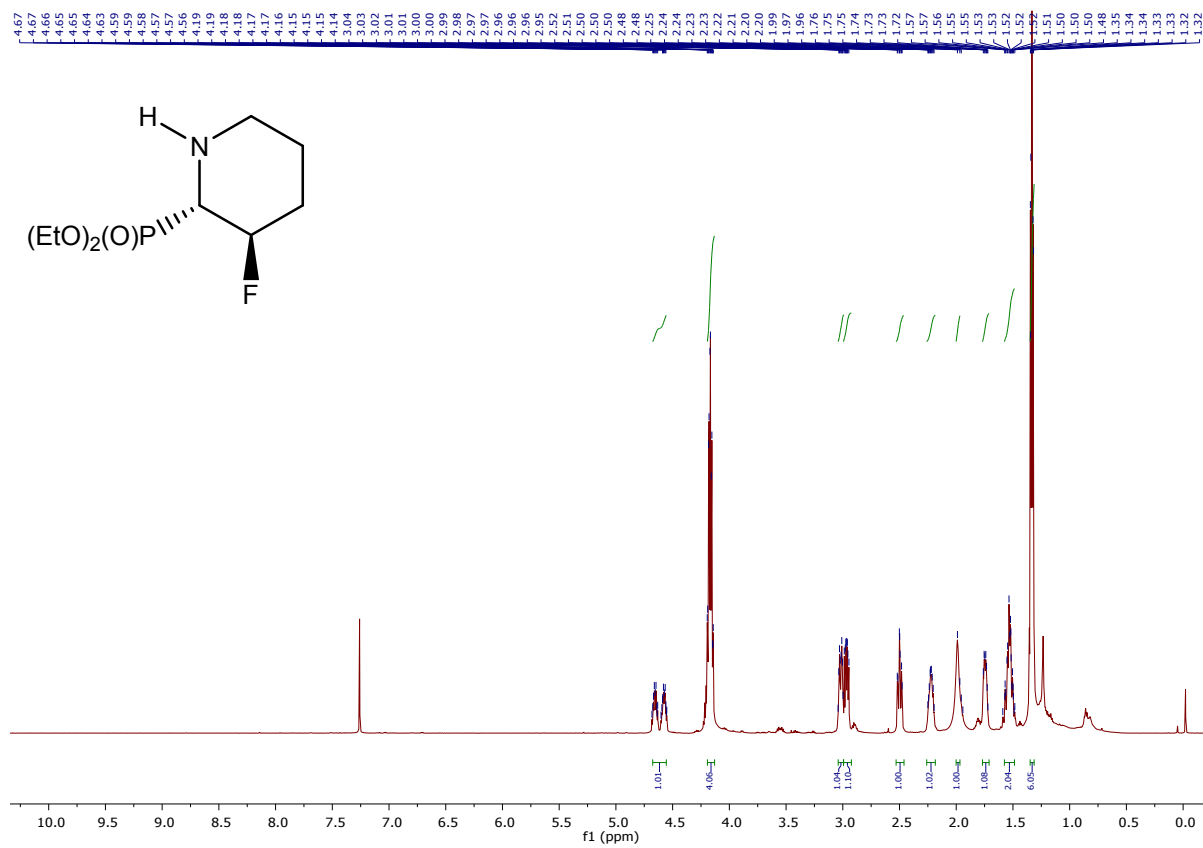

**<sup>1</sup>H NMR of 8**

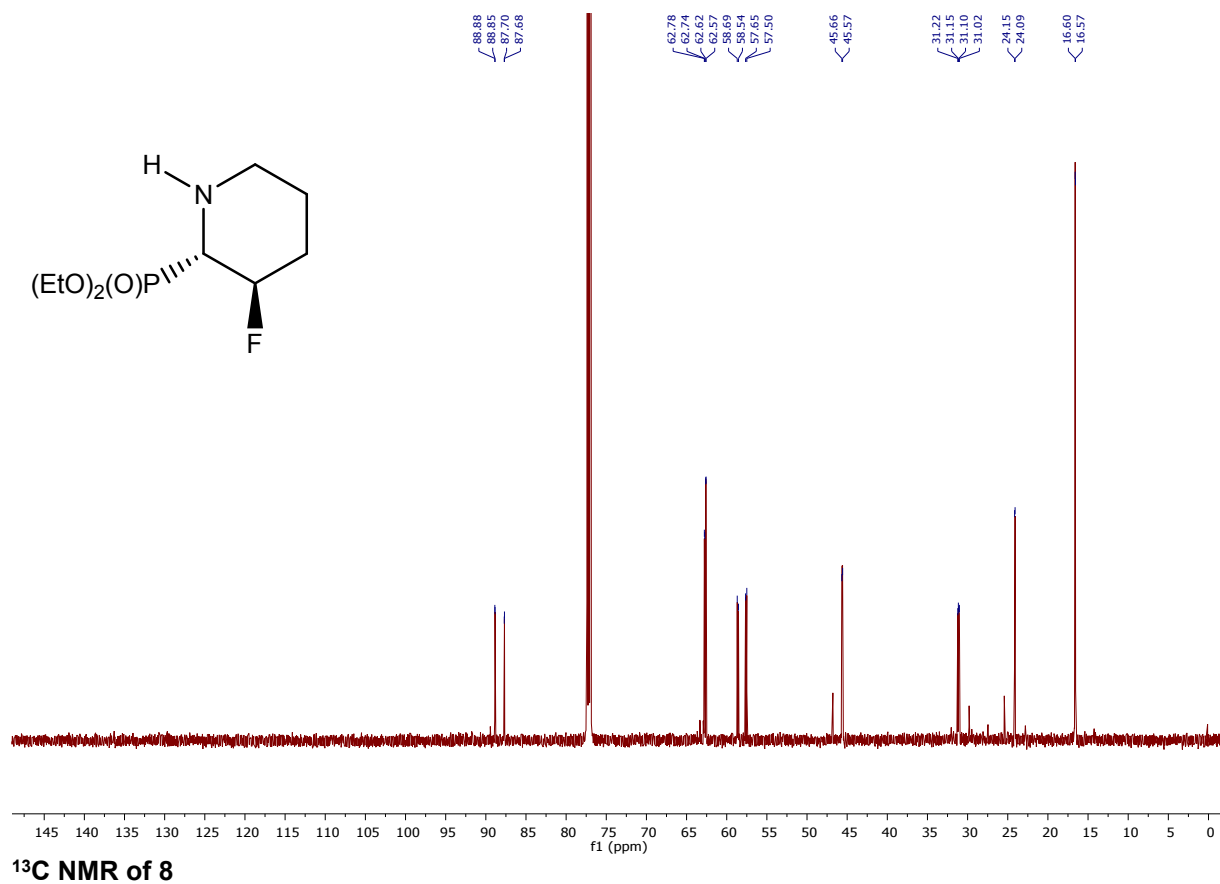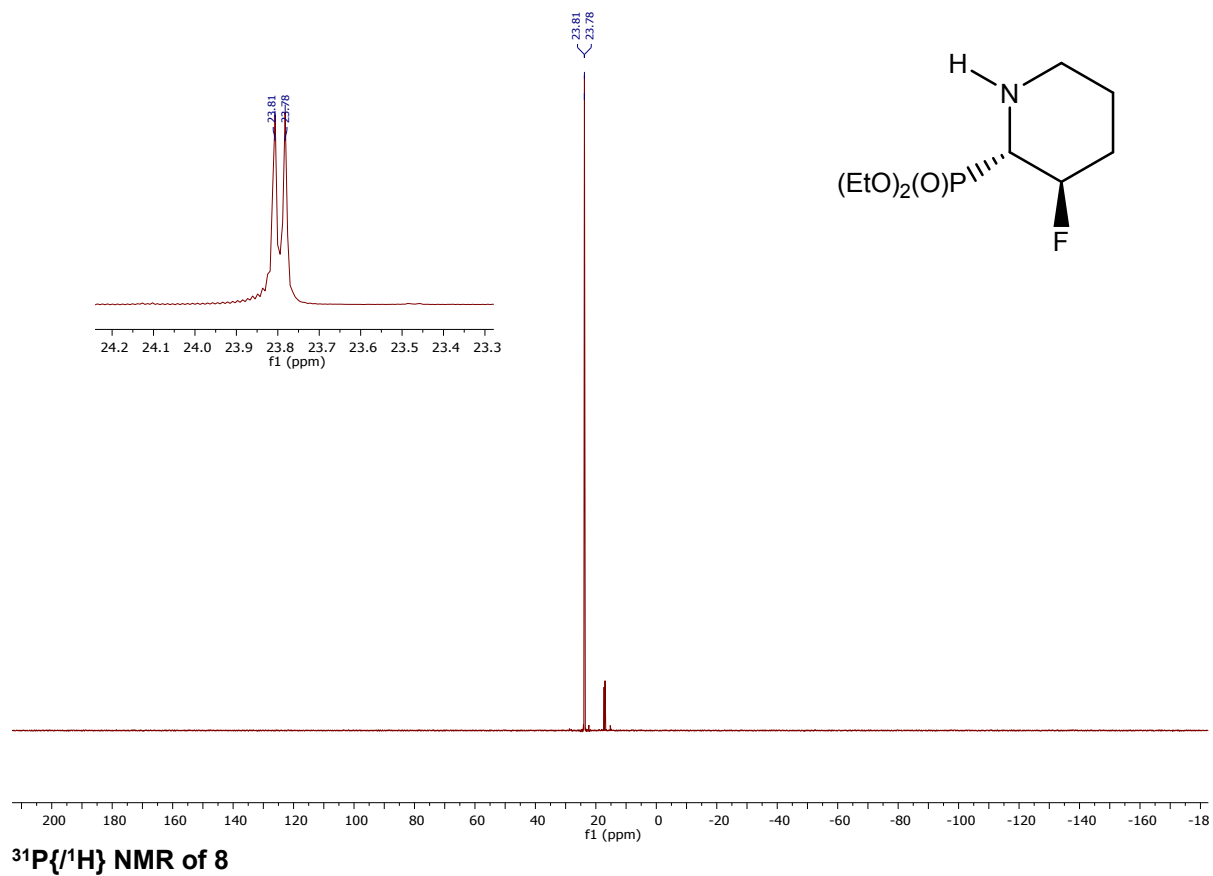

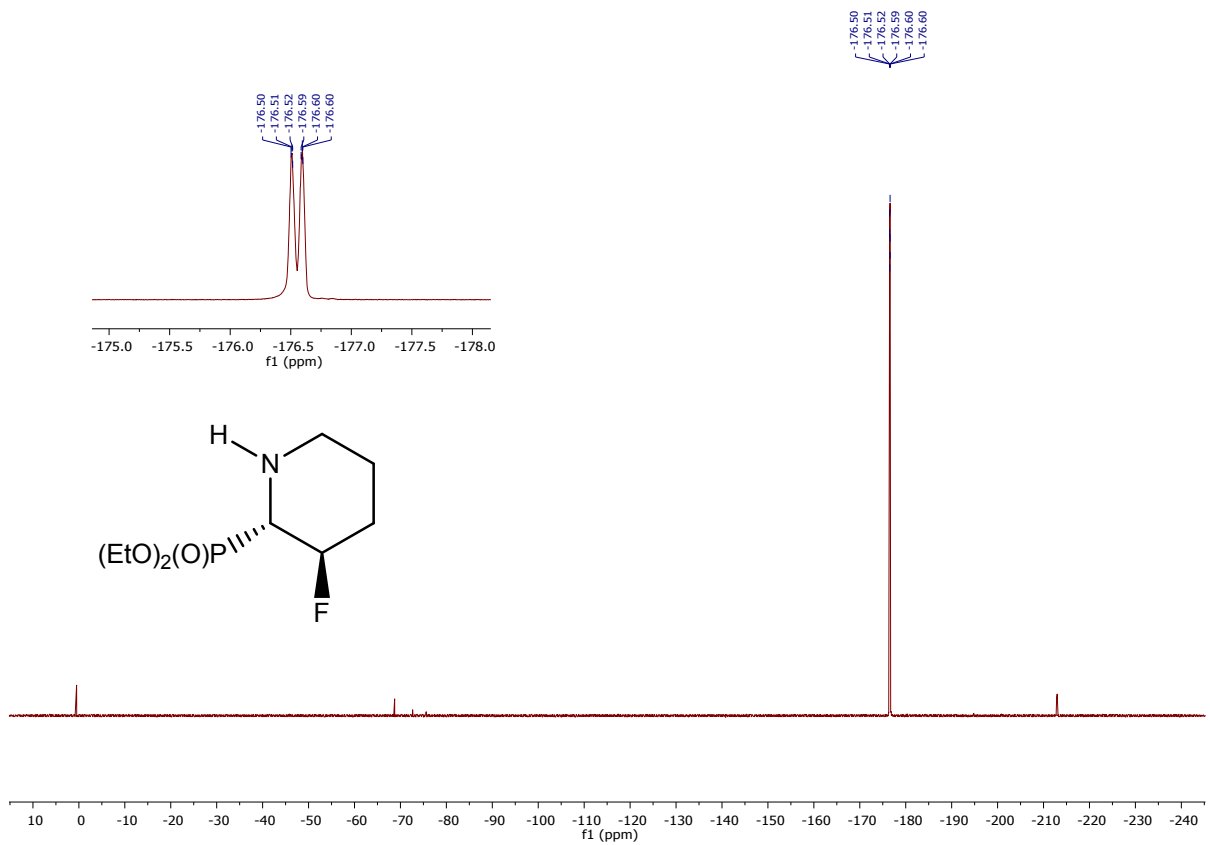

**<sup>19</sup>F NMR of 8**

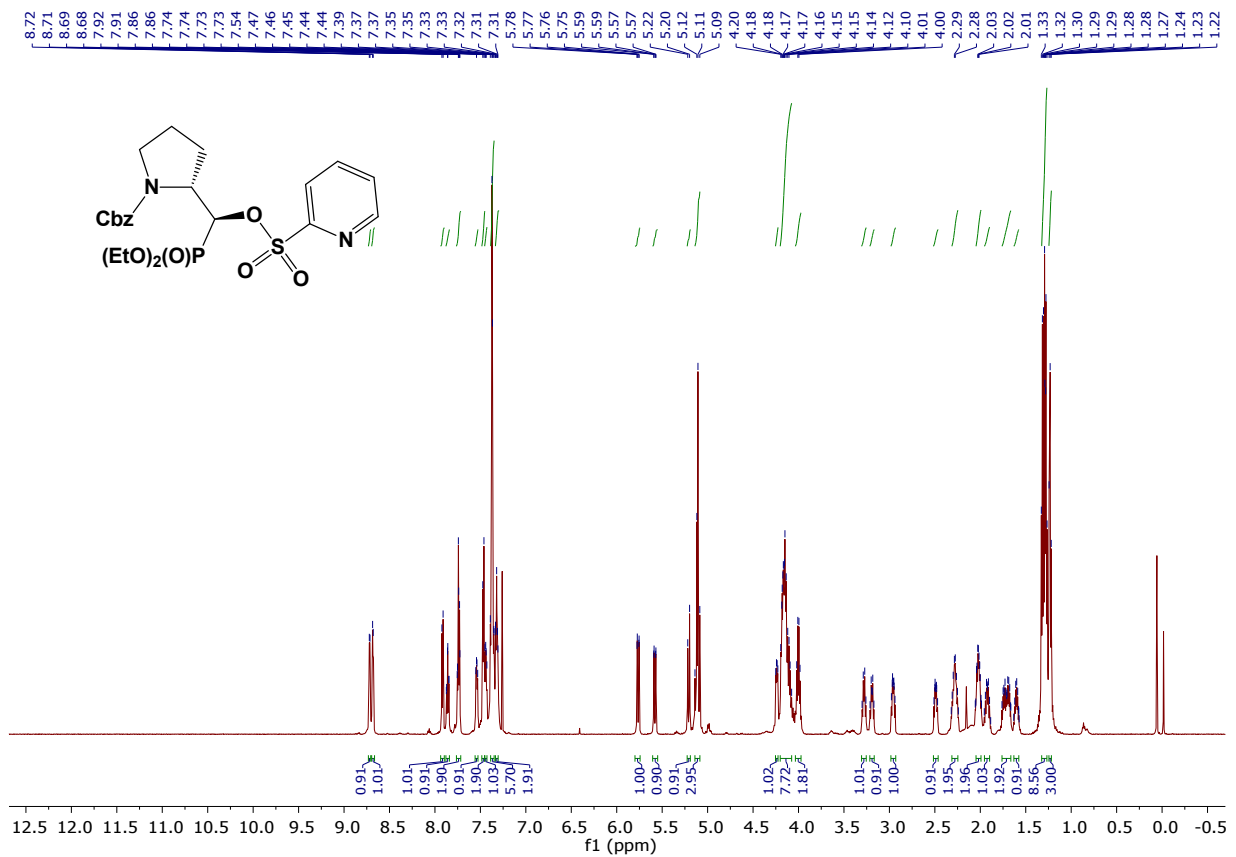

**<sup>1</sup>H NMR of 11a**

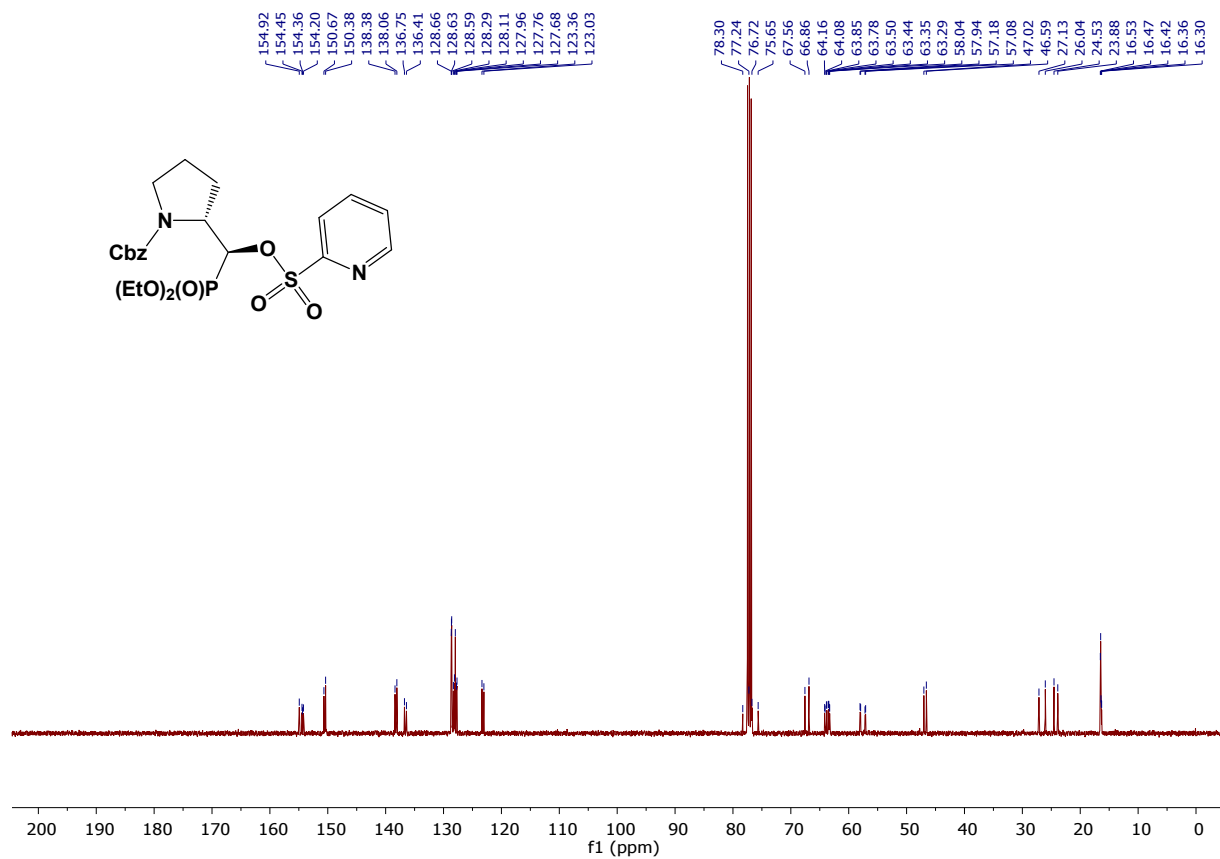

**<sup>13</sup>C NMR of 11a**

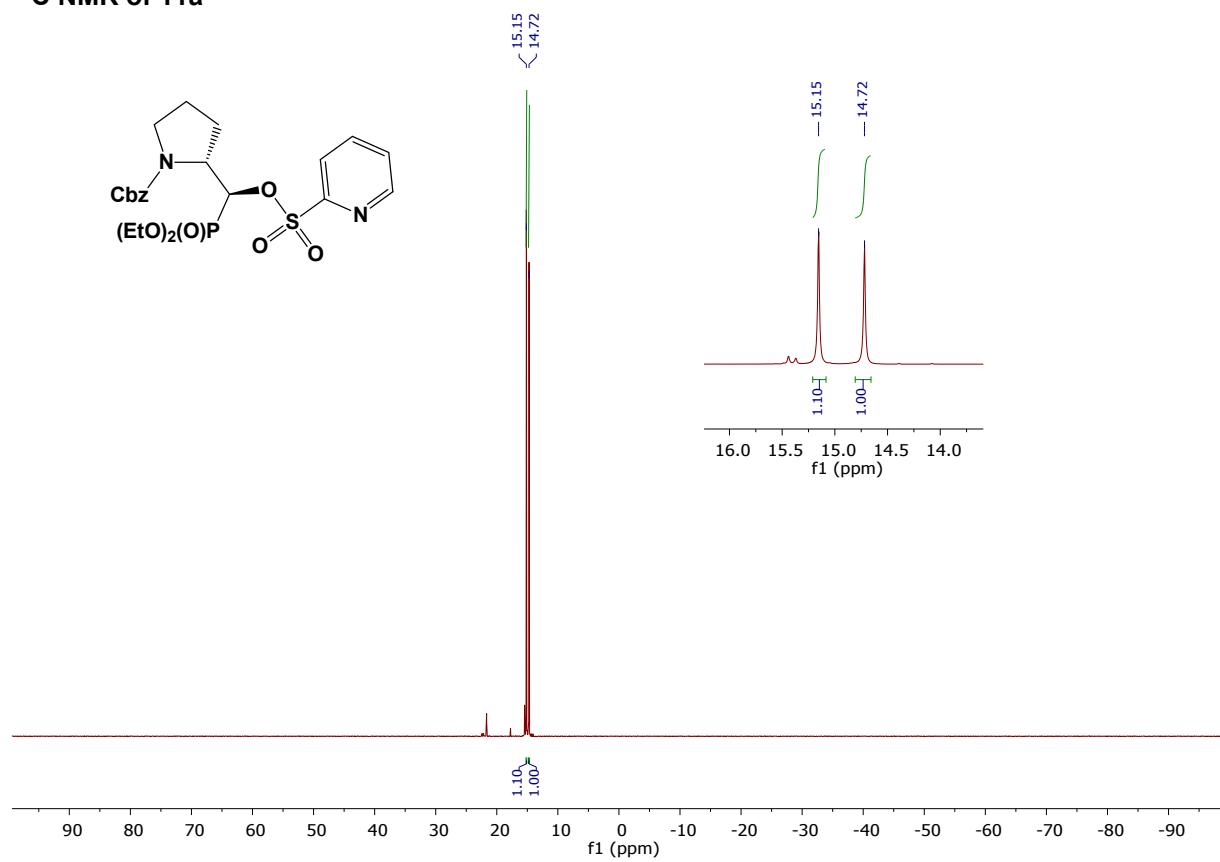

**<sup>31</sup>P{<sup>1</sup>H} NMR of 11a**

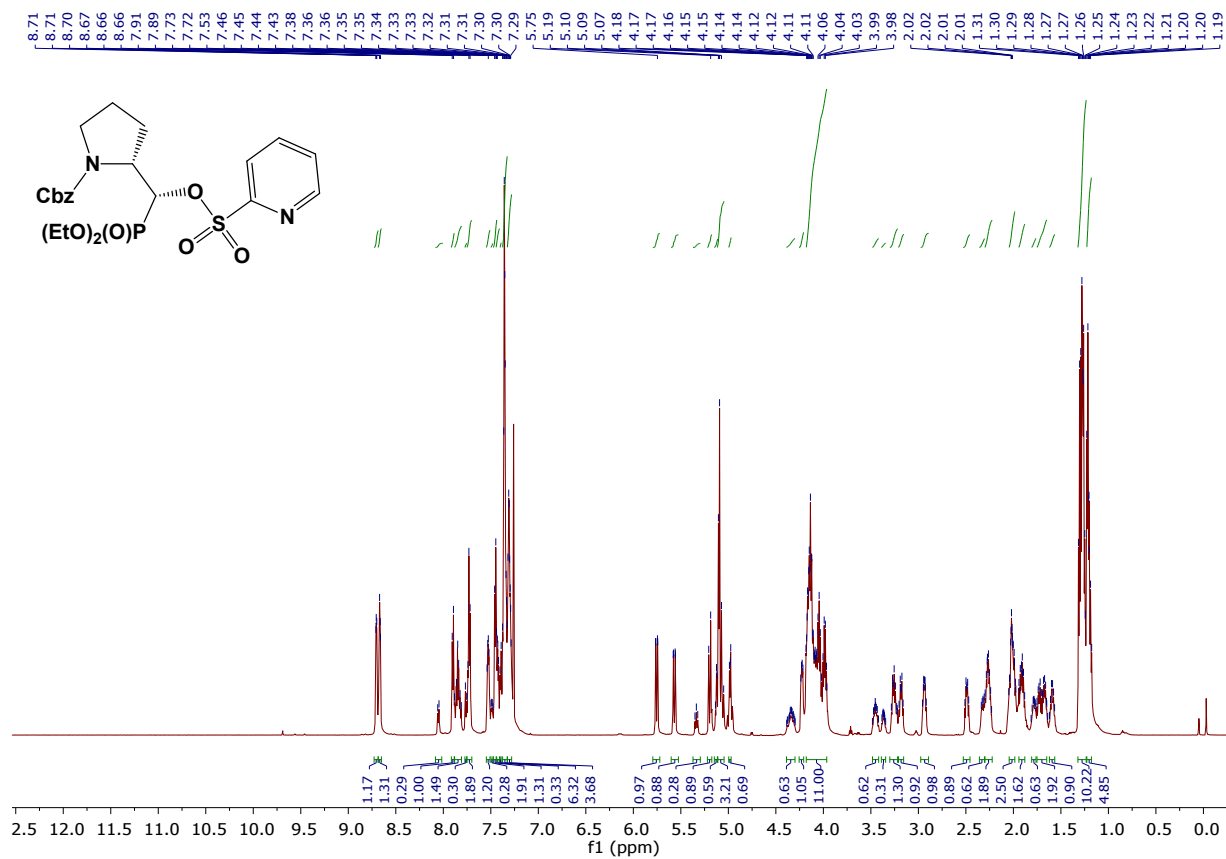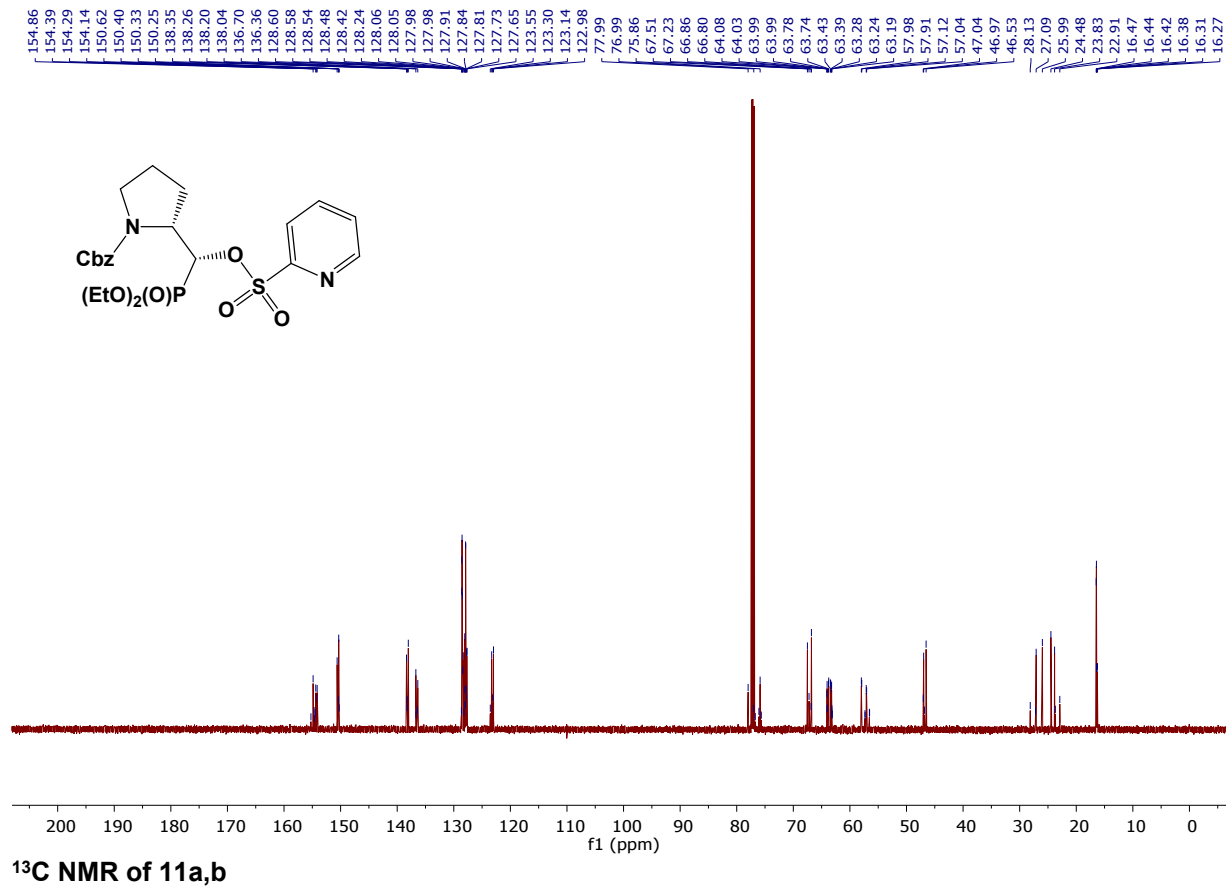

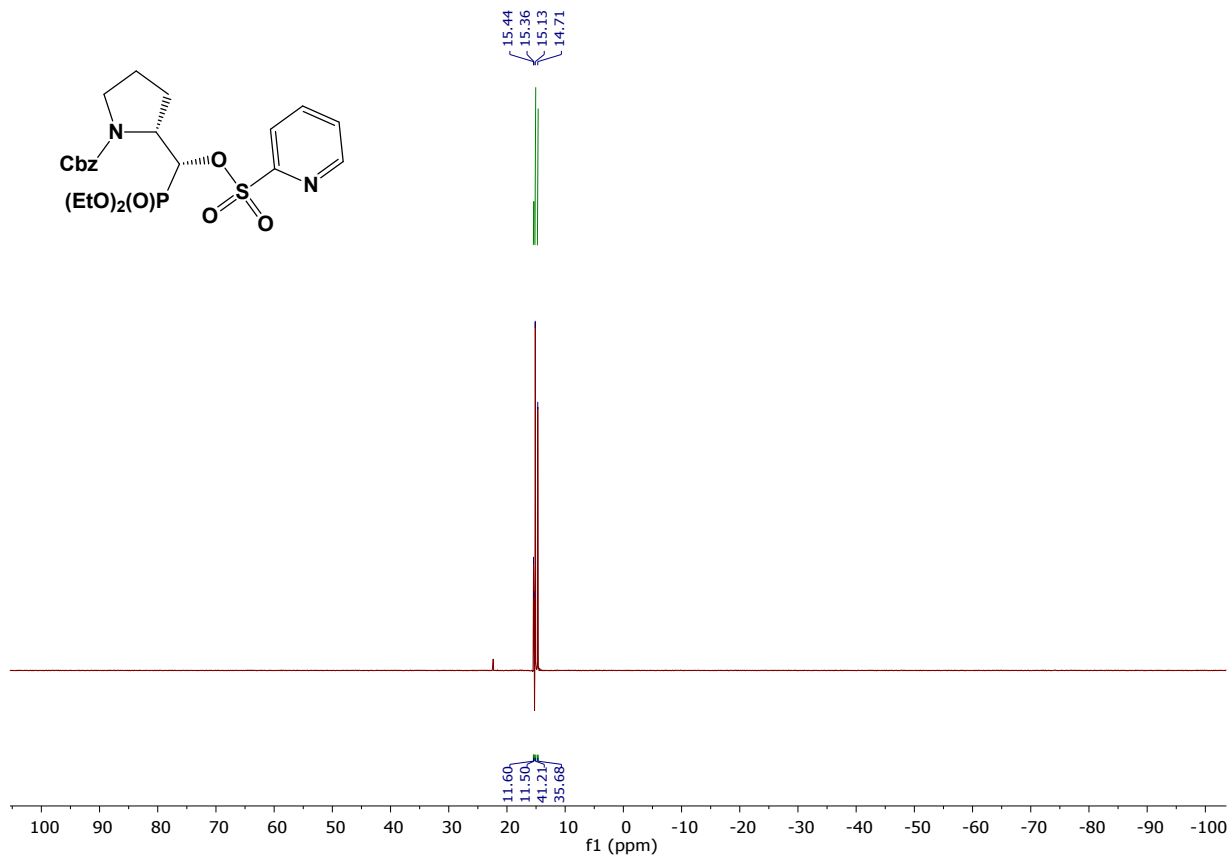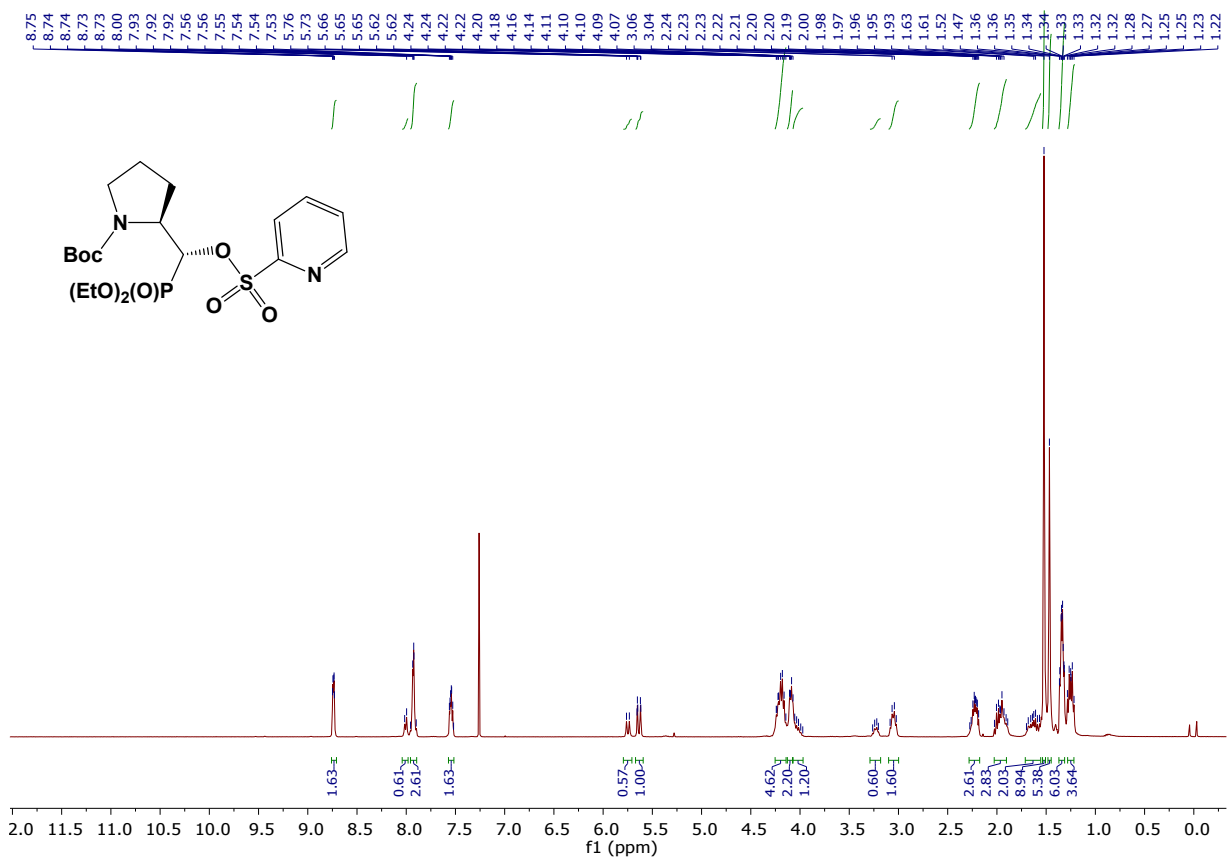

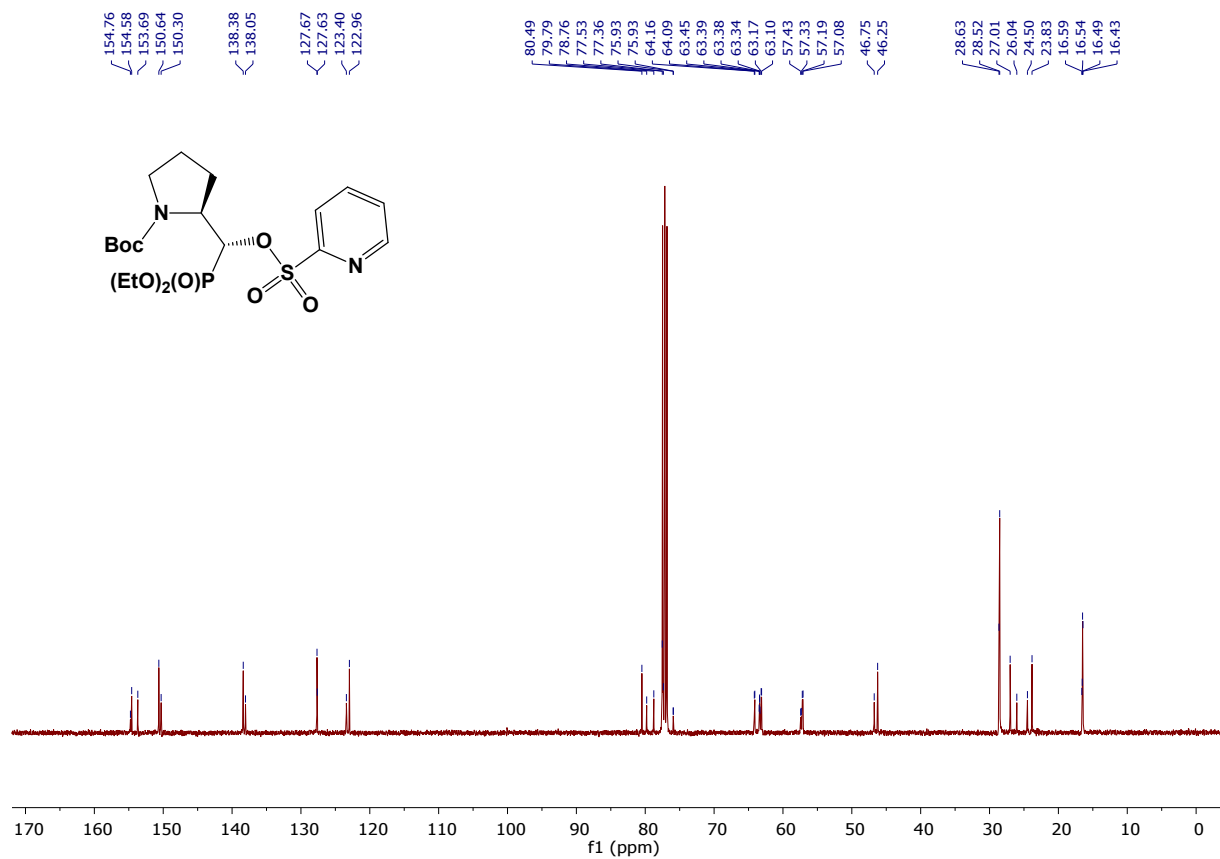

$^{13}\text{C}$  NMR of 12a

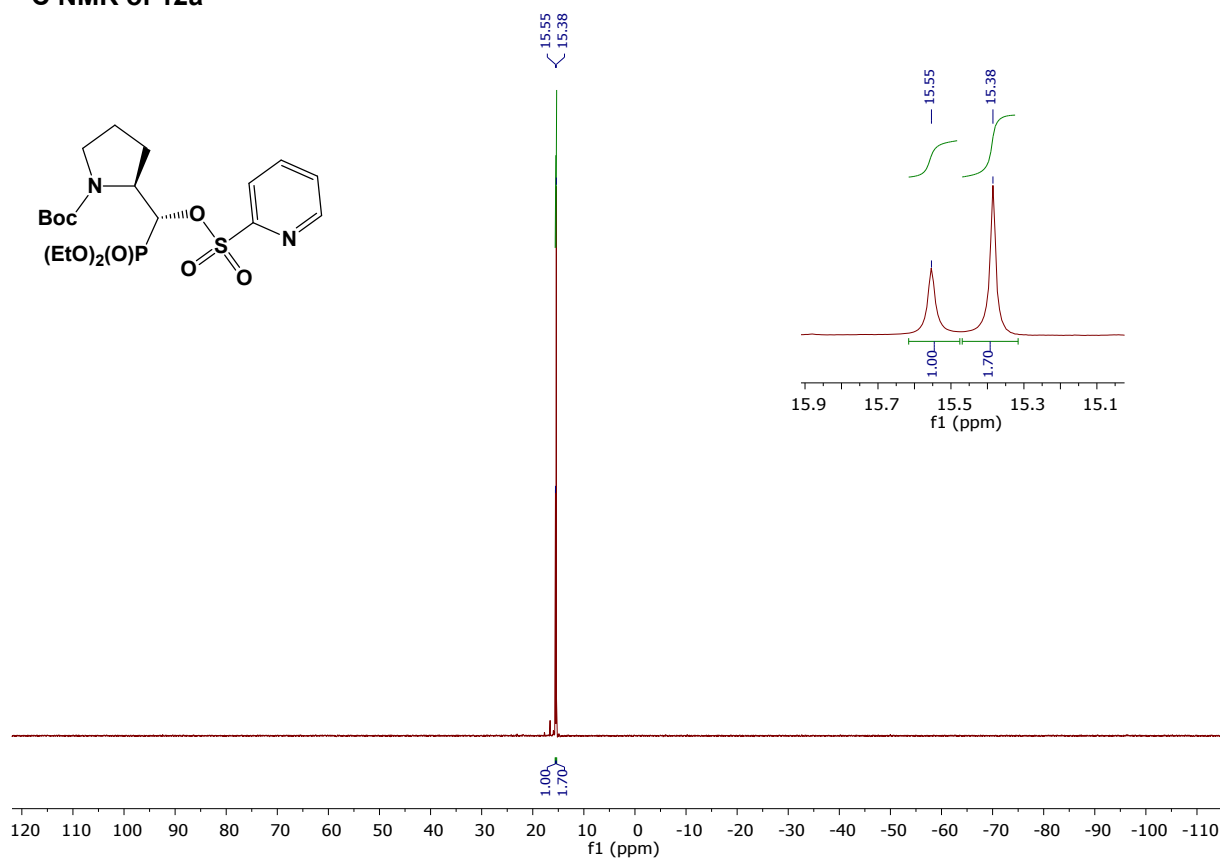

$^{31}\text{P}\{^1\text{H}\}$  NMR of 12a

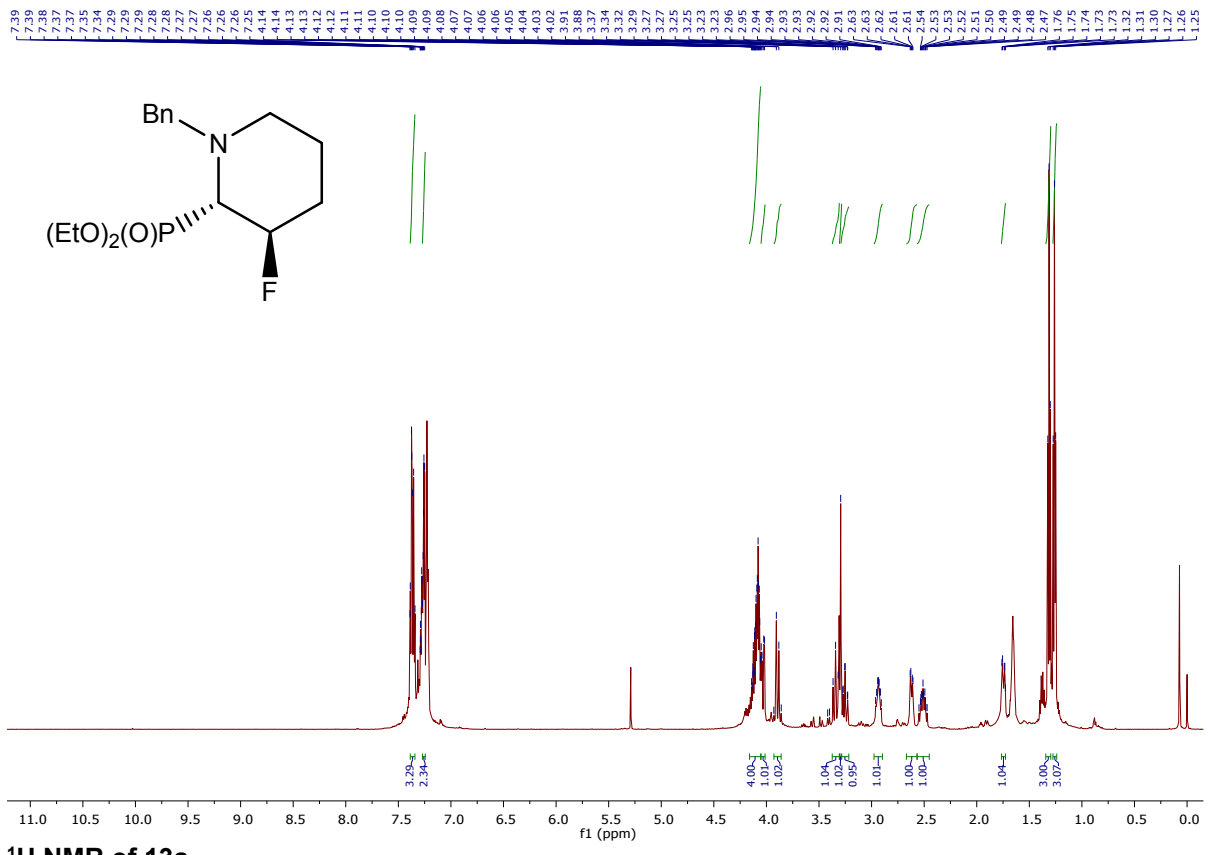

**<sup>1</sup>H NMR of 13a**

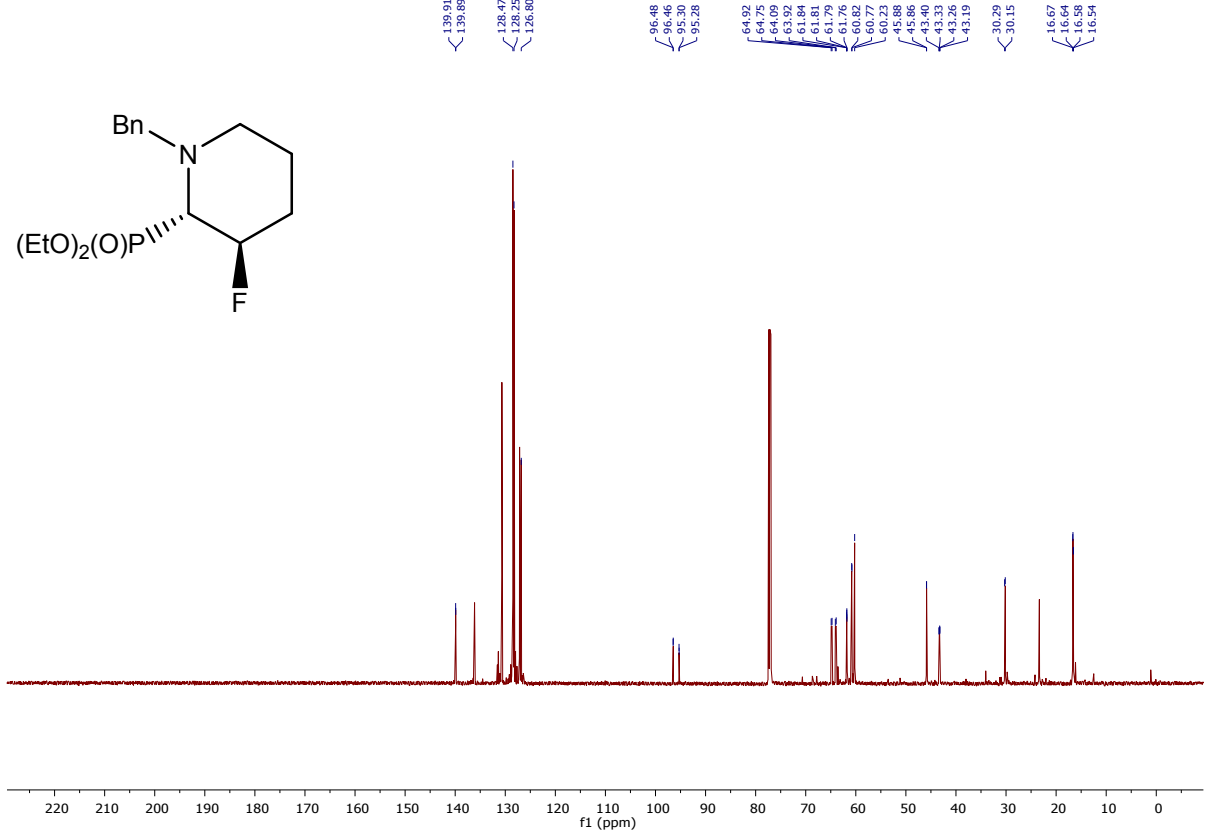

**<sup>13</sup>C NMR of 13a**



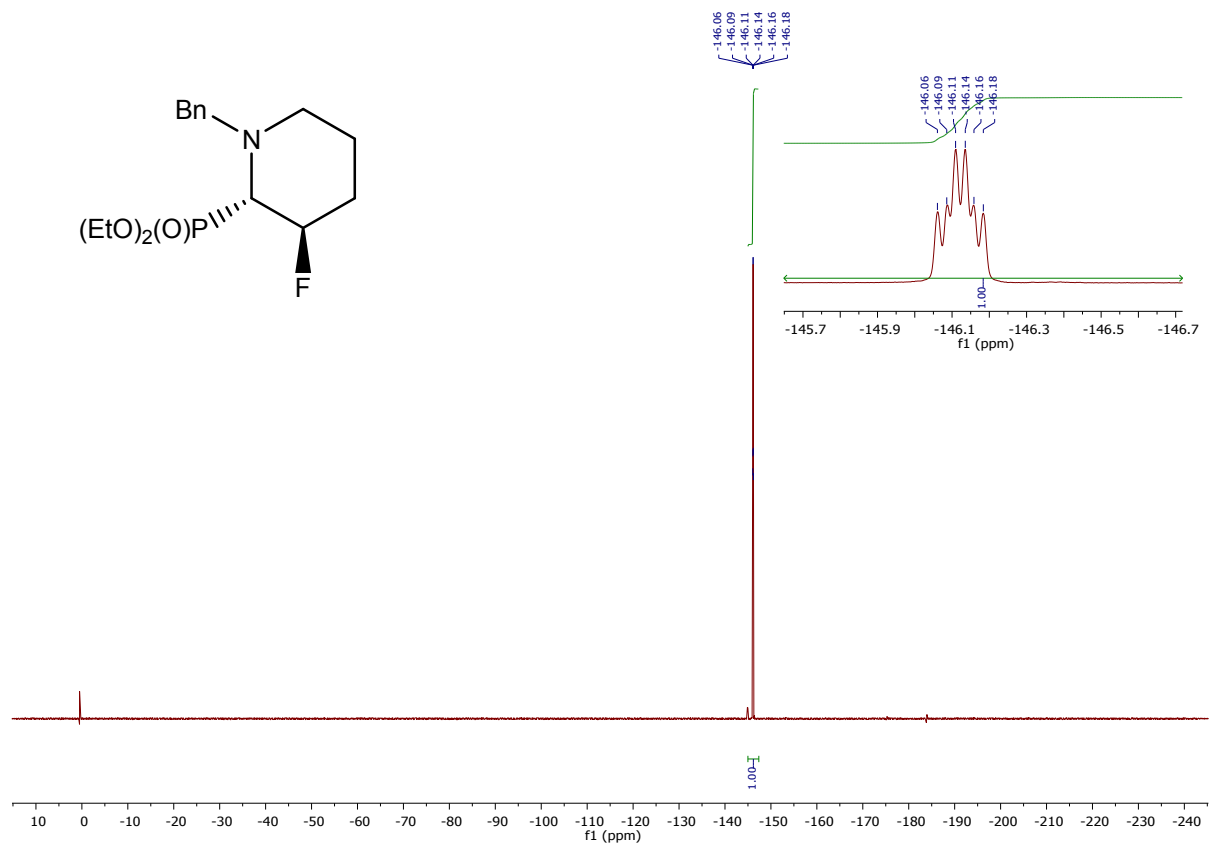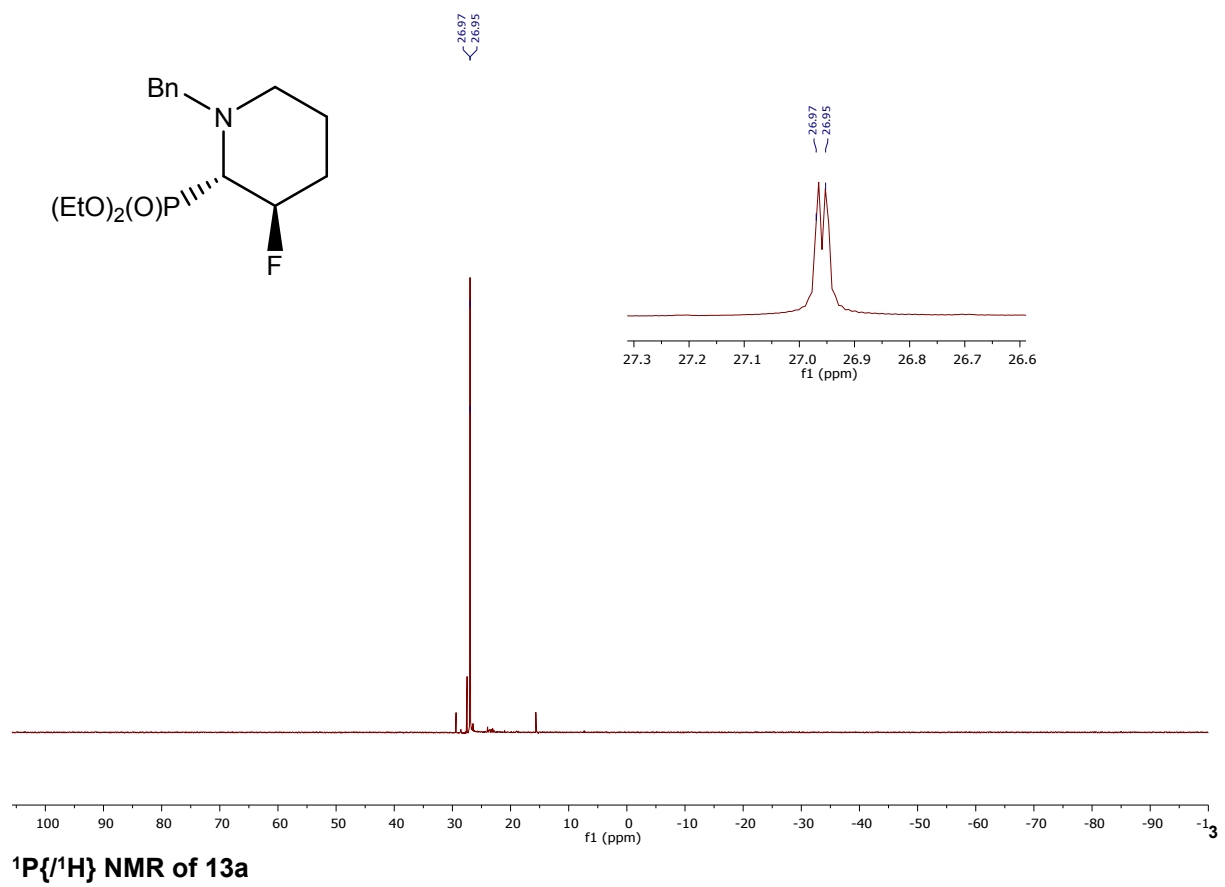

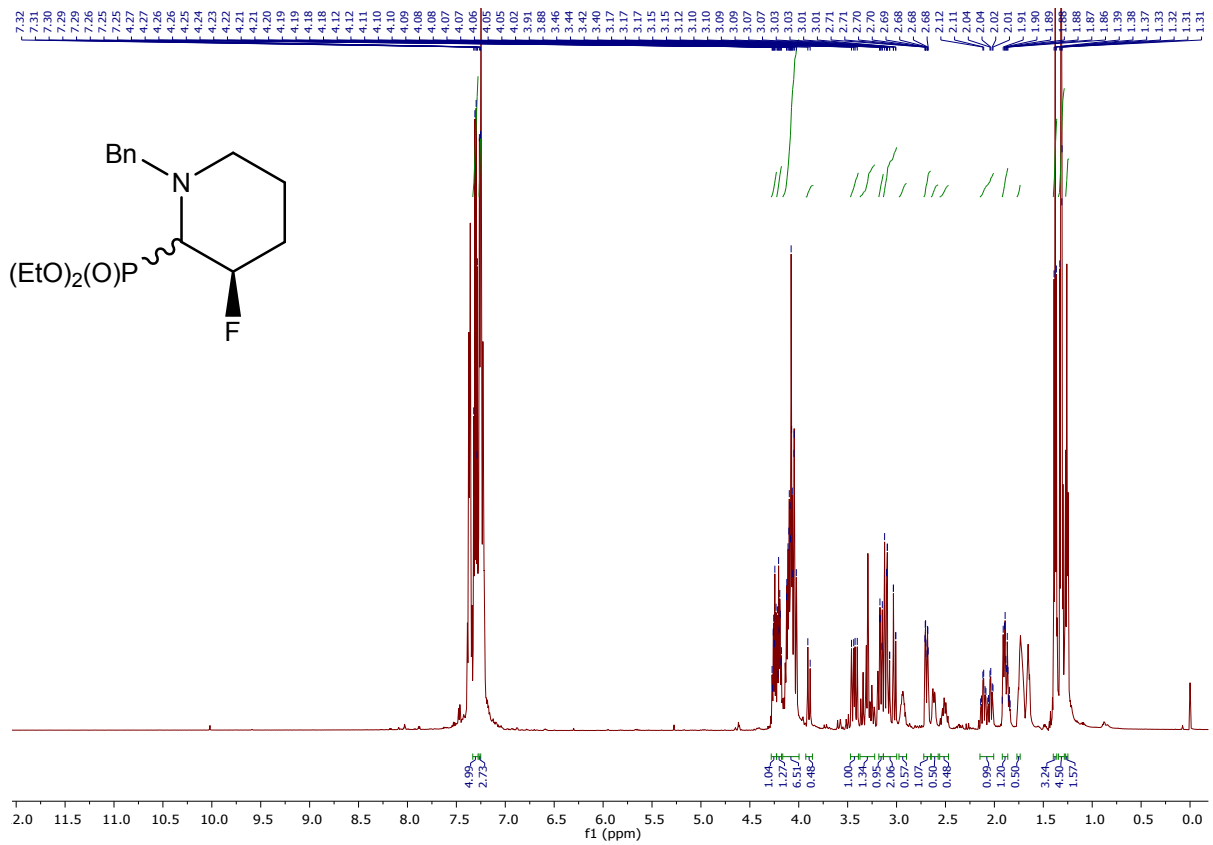

**<sup>1</sup>H NMR of 13a:13b (1:2.08 d.r.)**

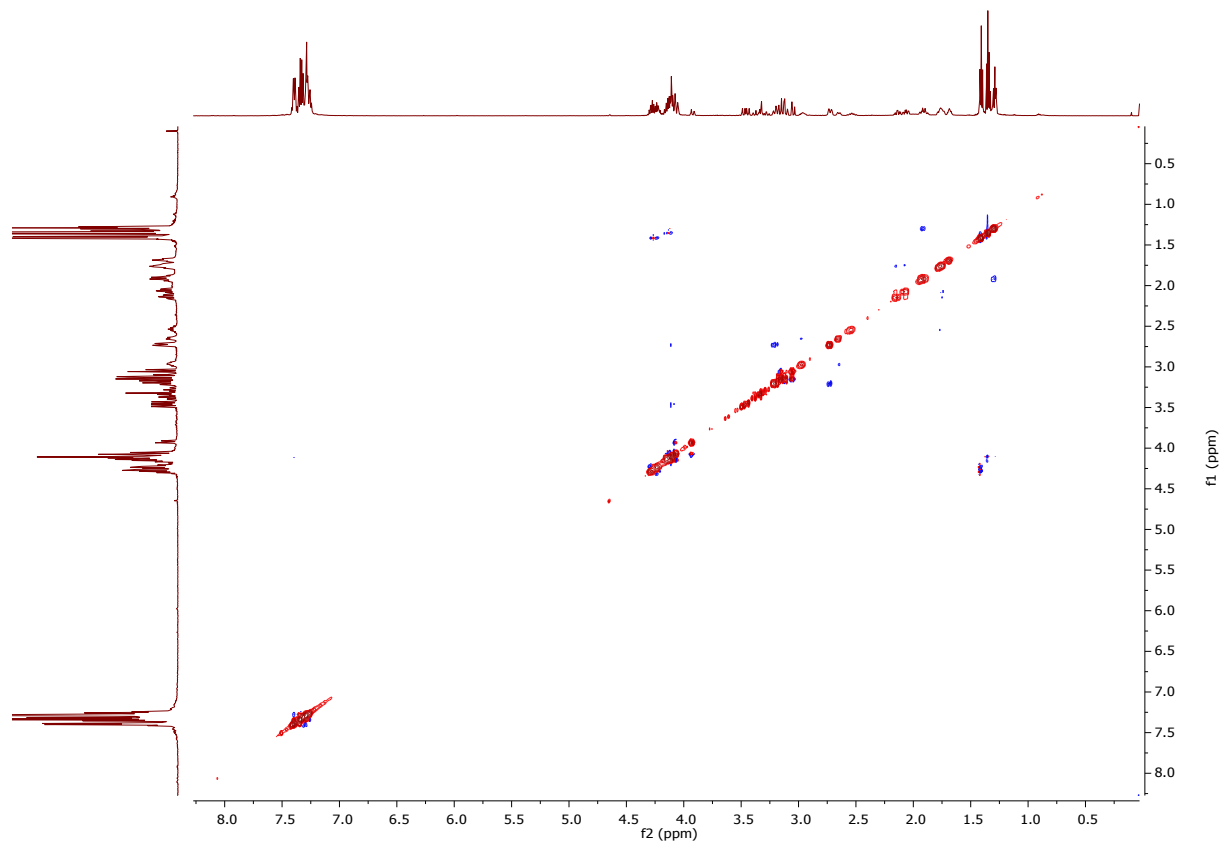

**<sup>1</sup>H-<sup>1</sup>H NOESY of 13a:13b (1:2.08 d.r.)**

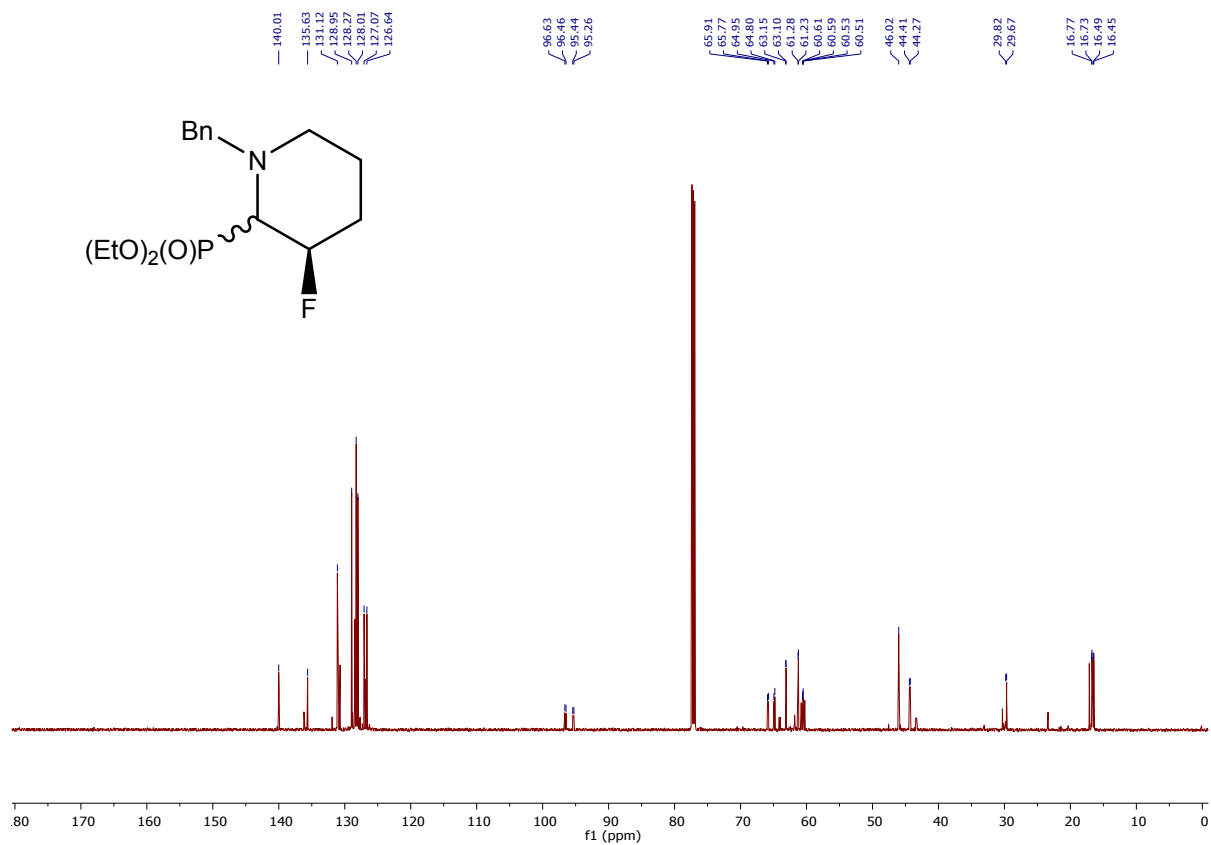

**<sup>13</sup>C NMR of 13a:13b (1:2.8 d.r.)**

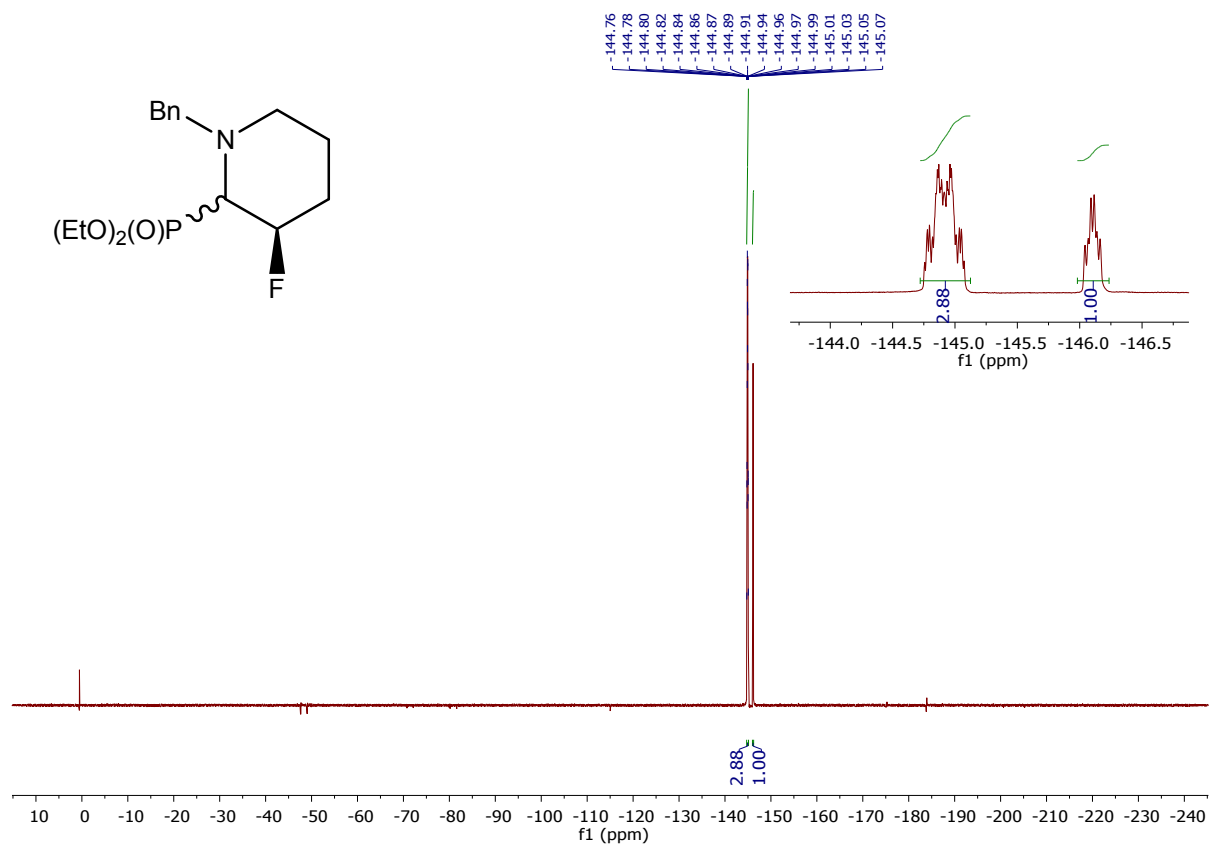

**<sup>19</sup>F NMR of 13a:13b (1:2.8 d.r.)**

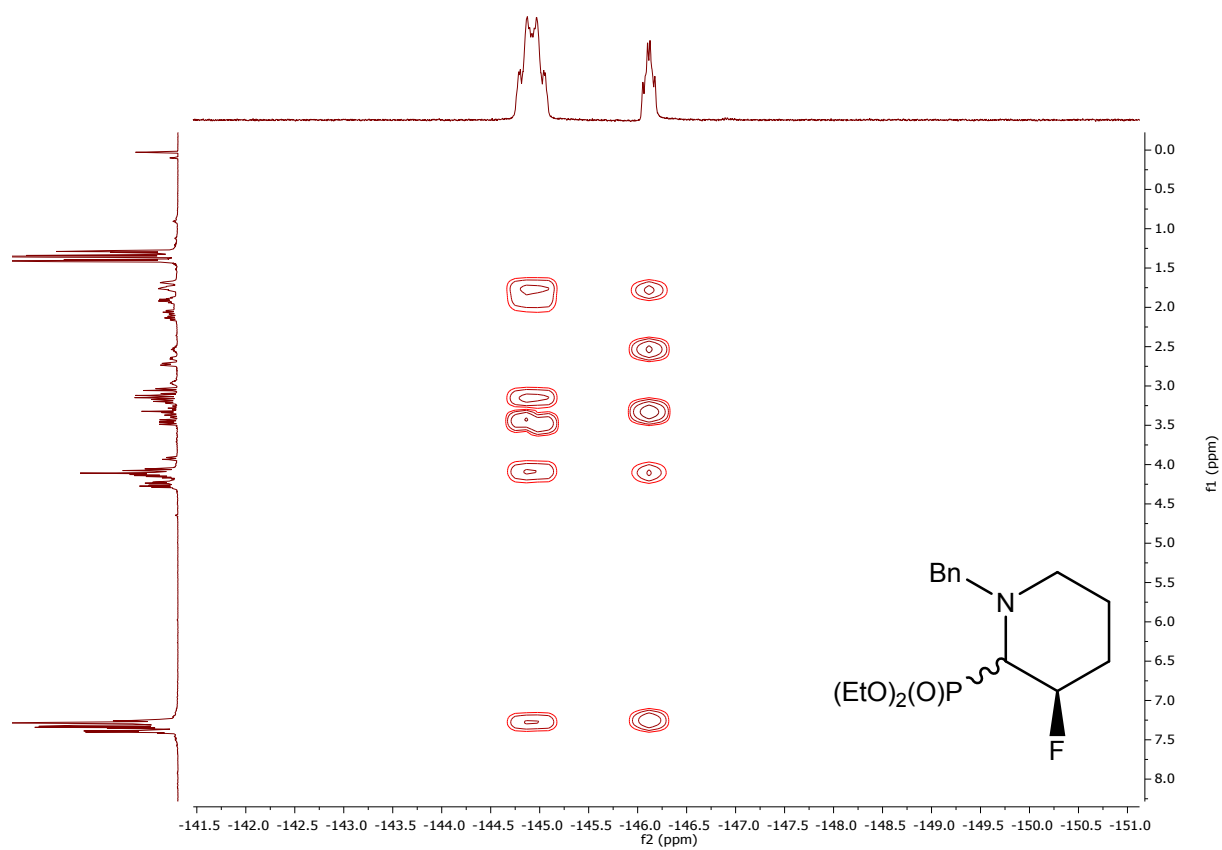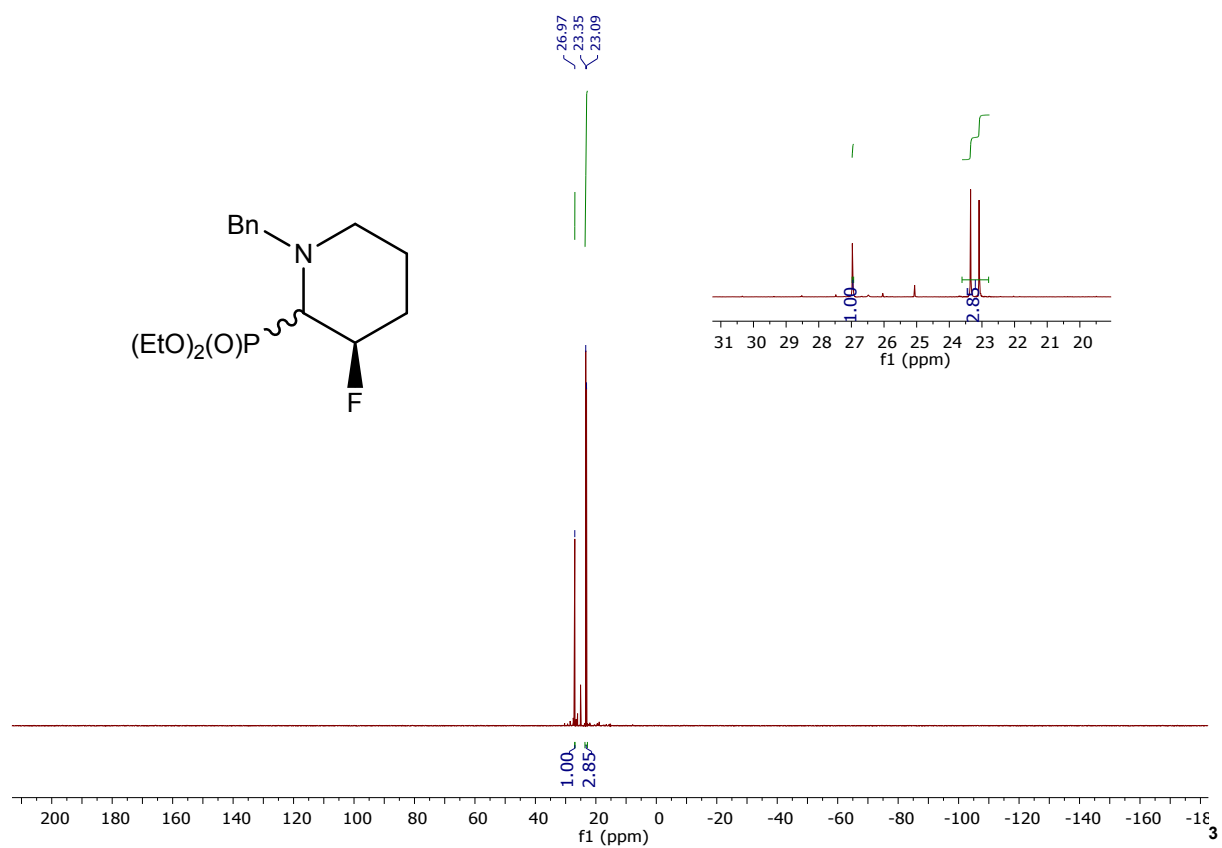

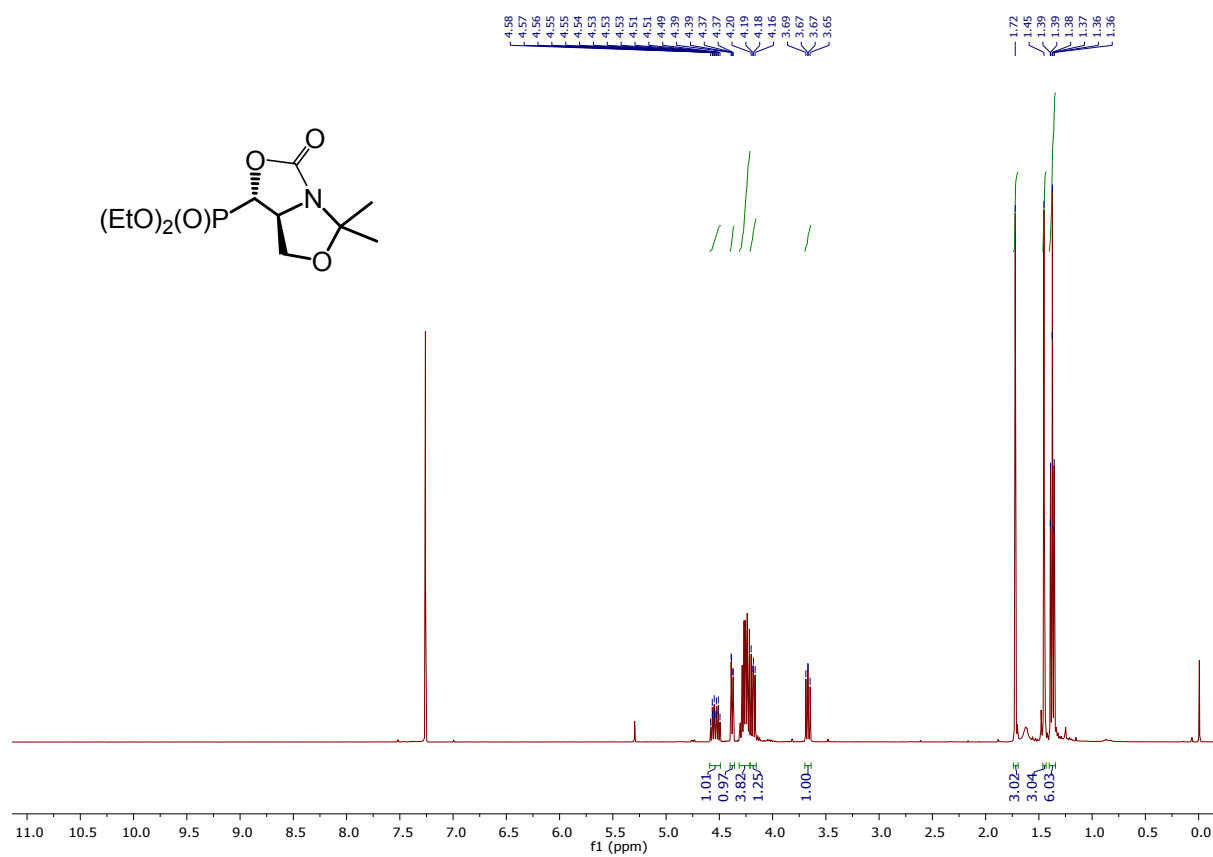

**<sup>1</sup>H NMR of 17**

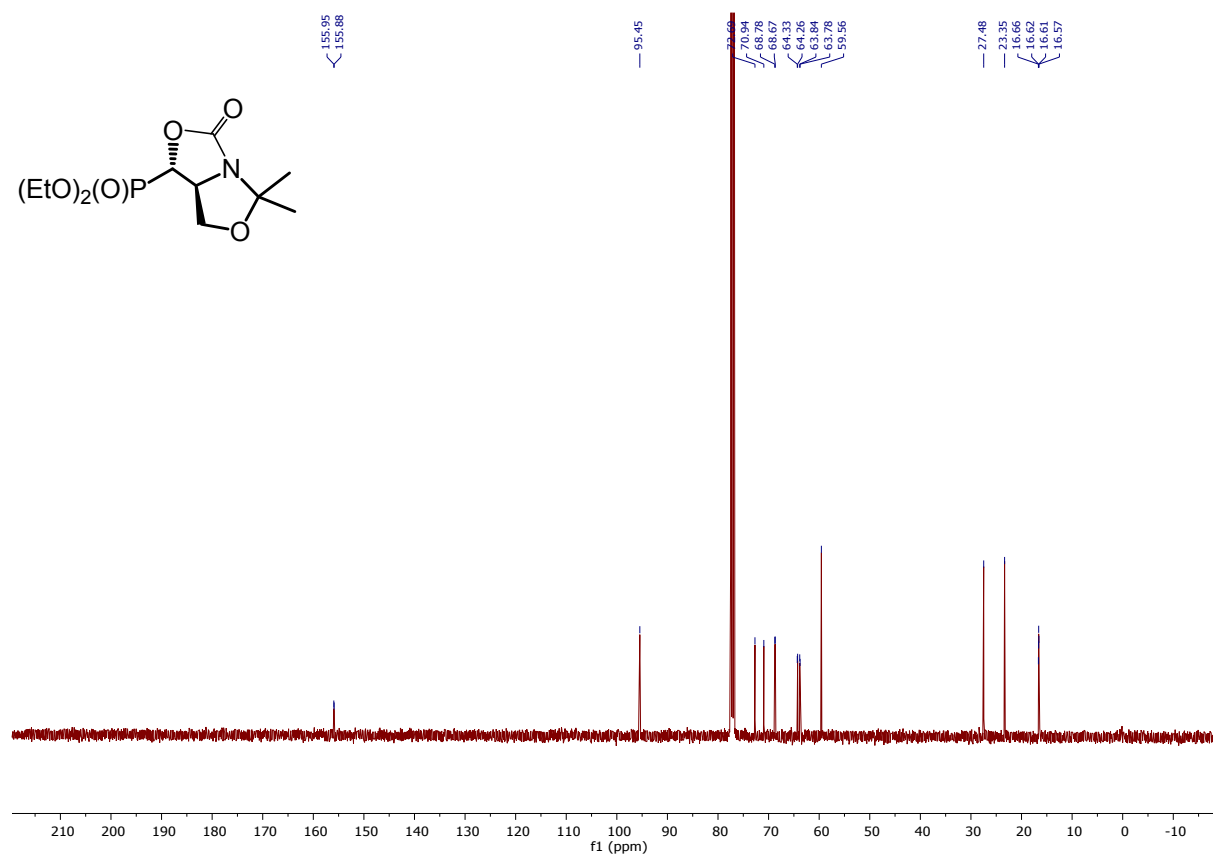

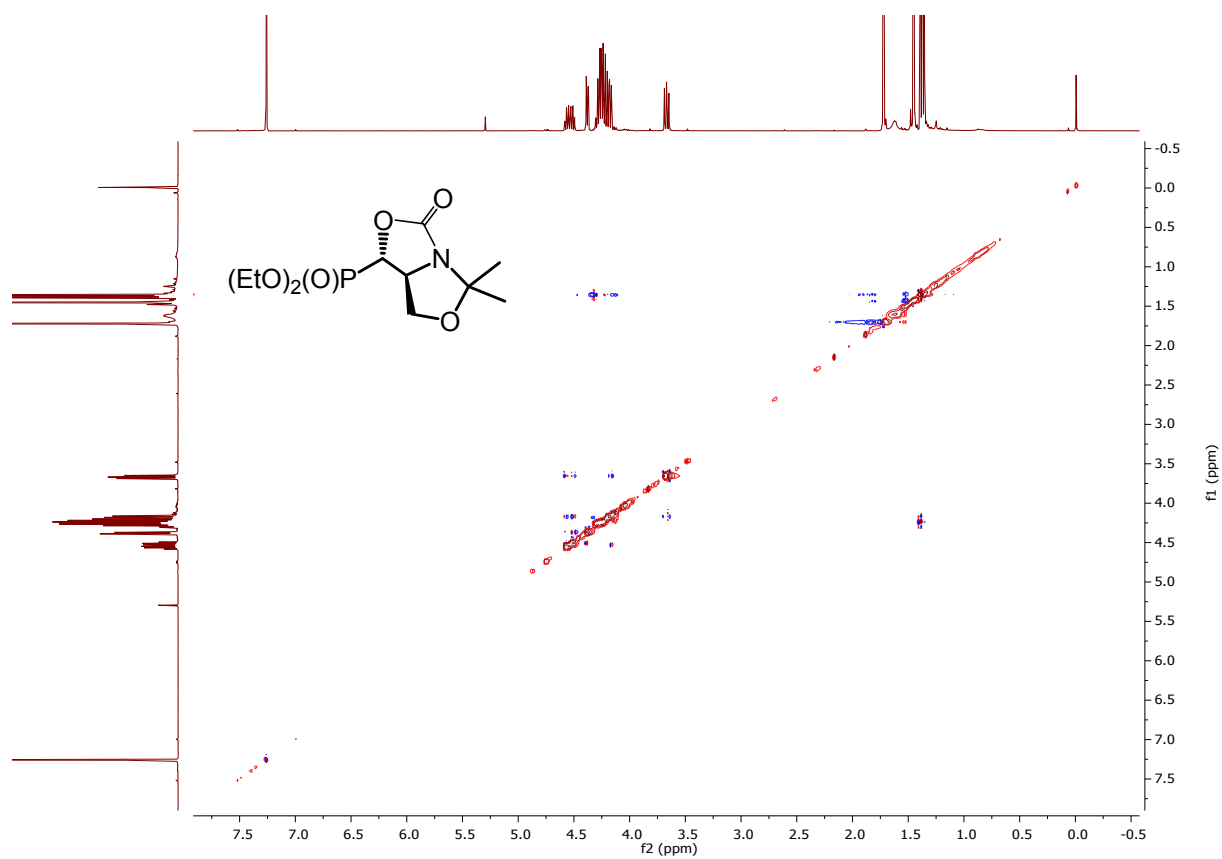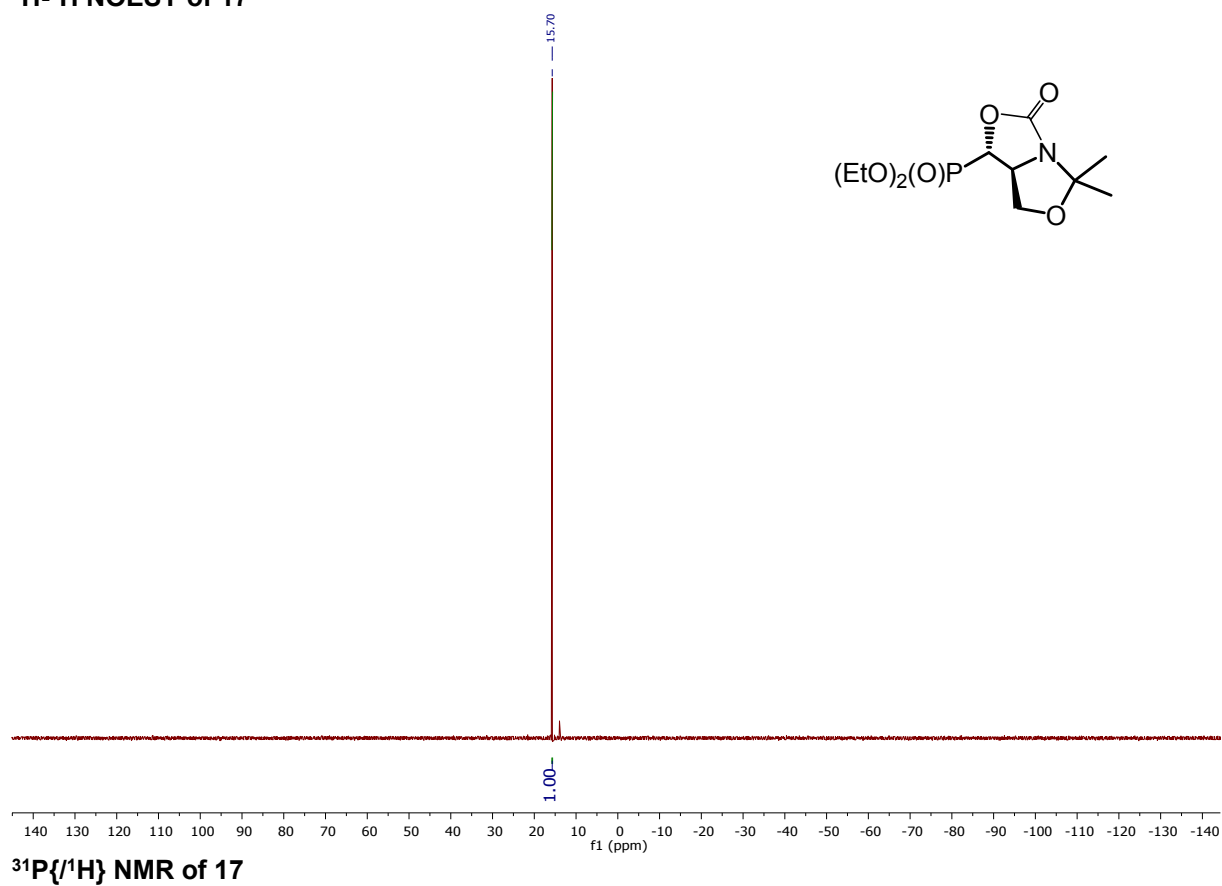

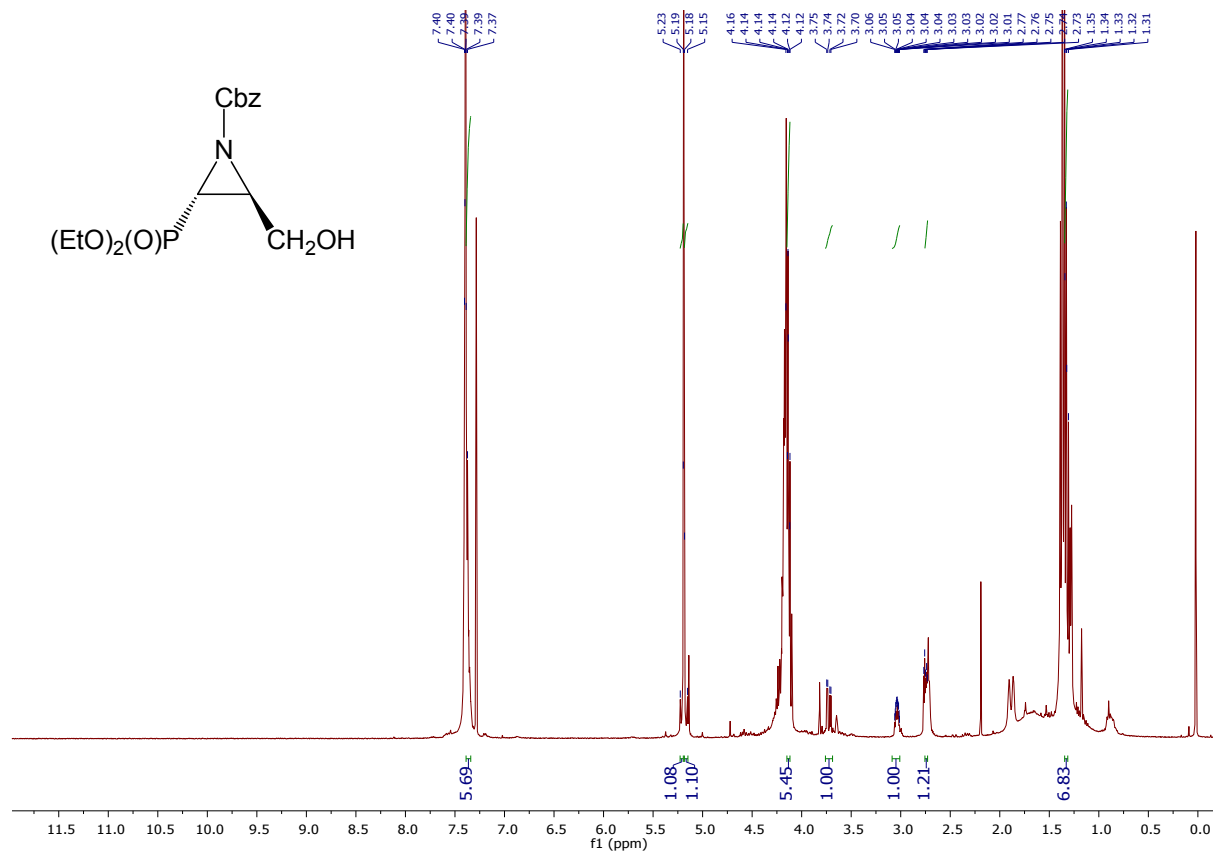

**<sup>1</sup>H NMR of 18**

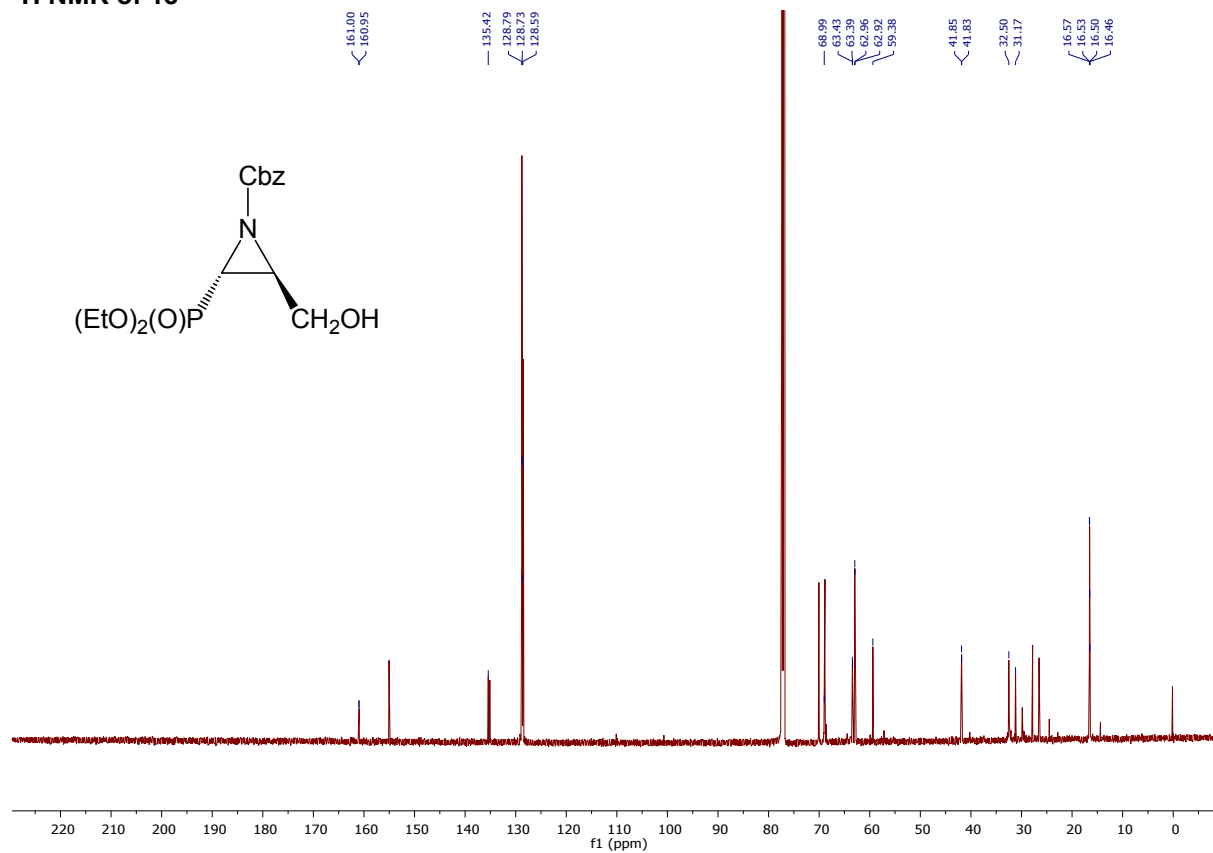

**<sup>13</sup>C NMR of 18**

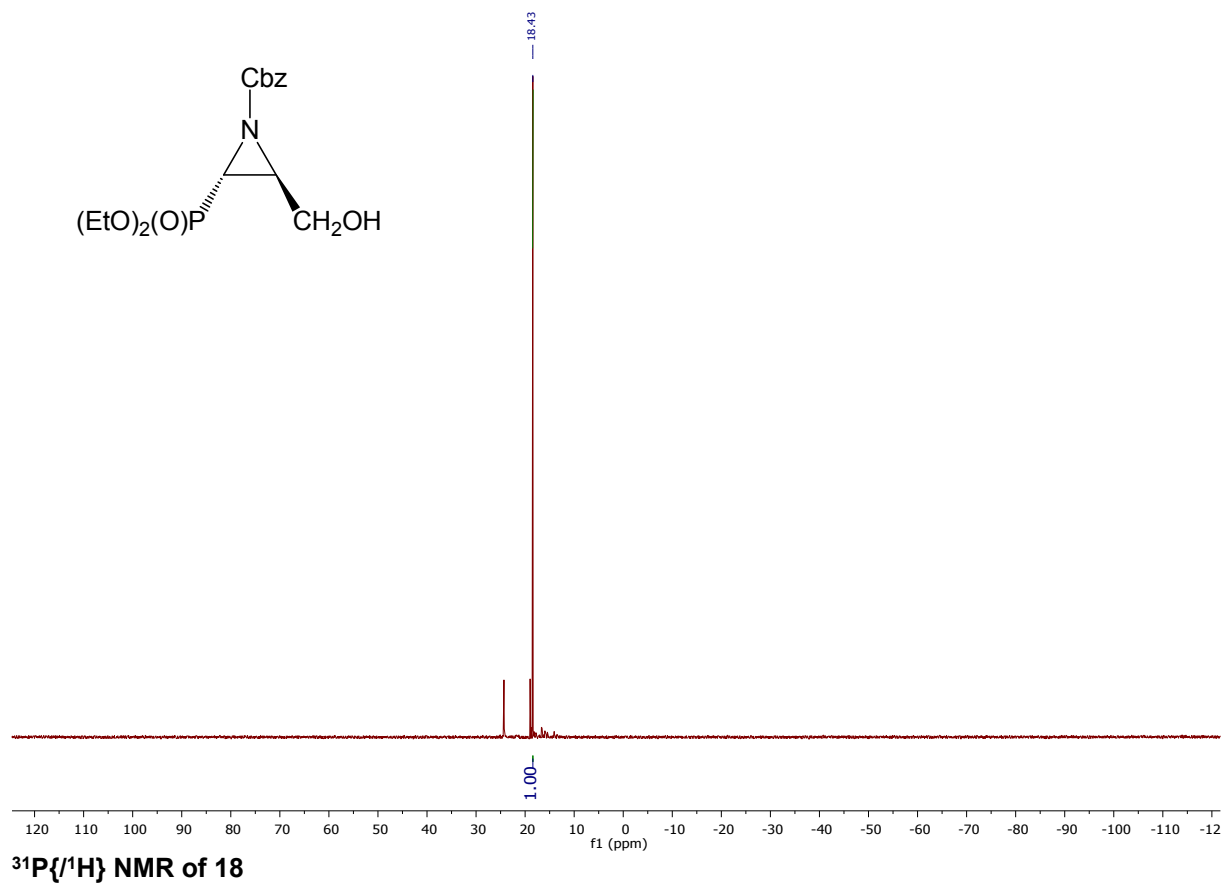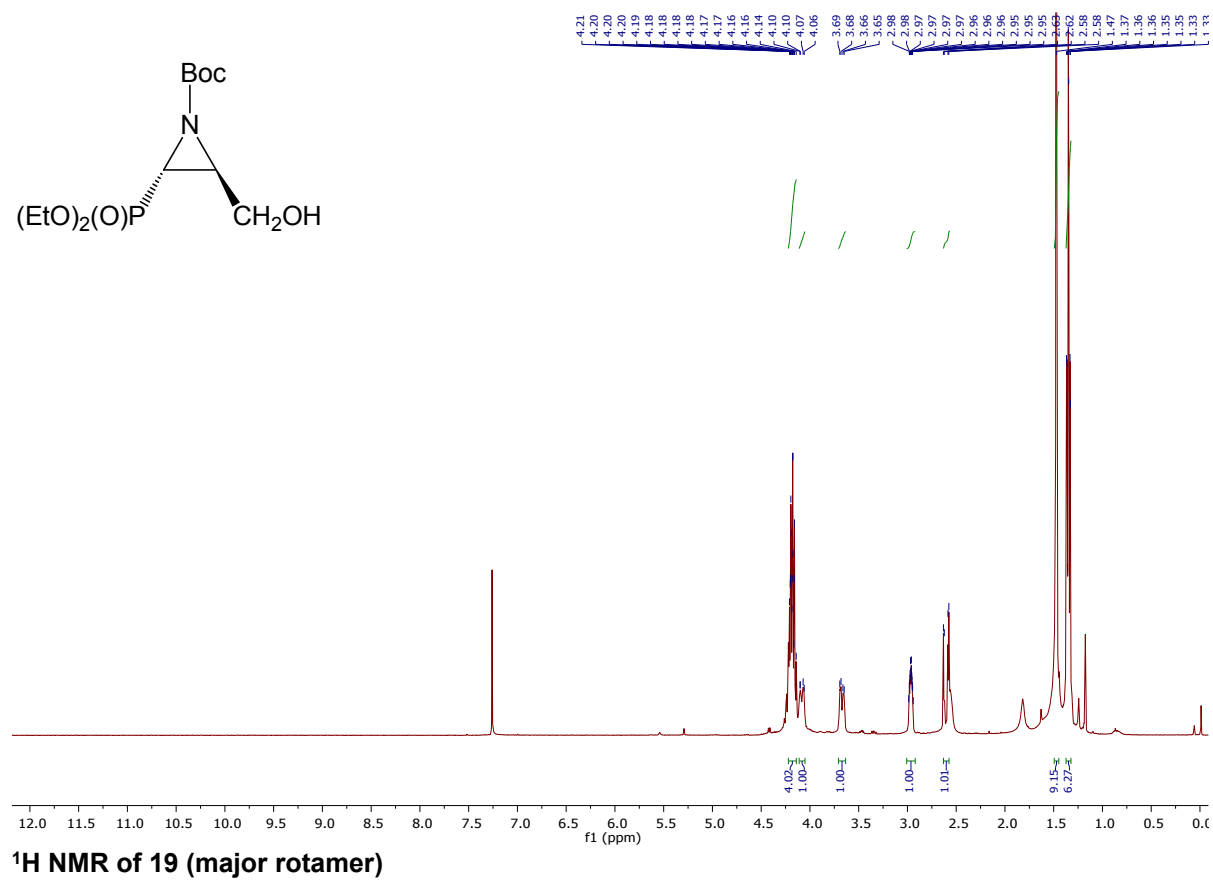



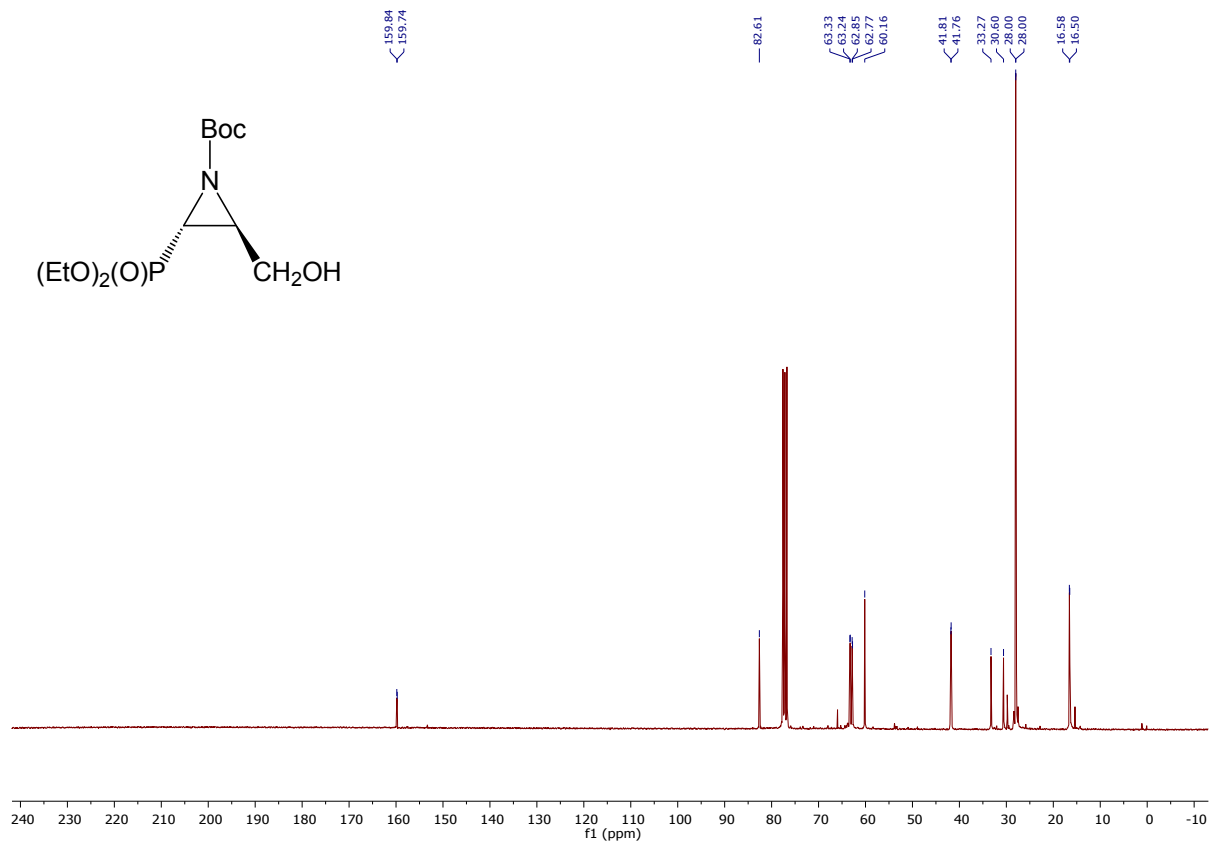

<sup>13</sup>C NMR of 19 (major rotamer)

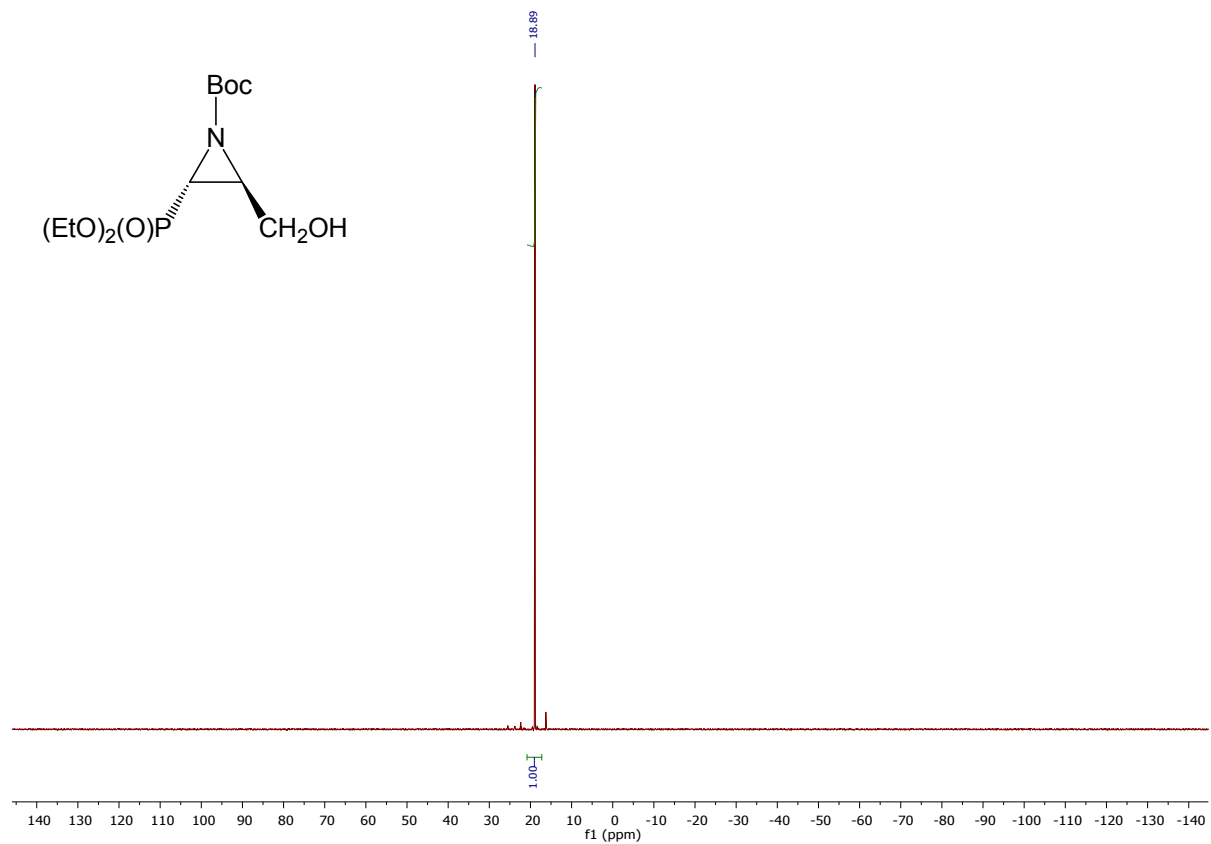

<sup>31</sup>P{<sup>1</sup>H} NMR of 19 (major rotamer)

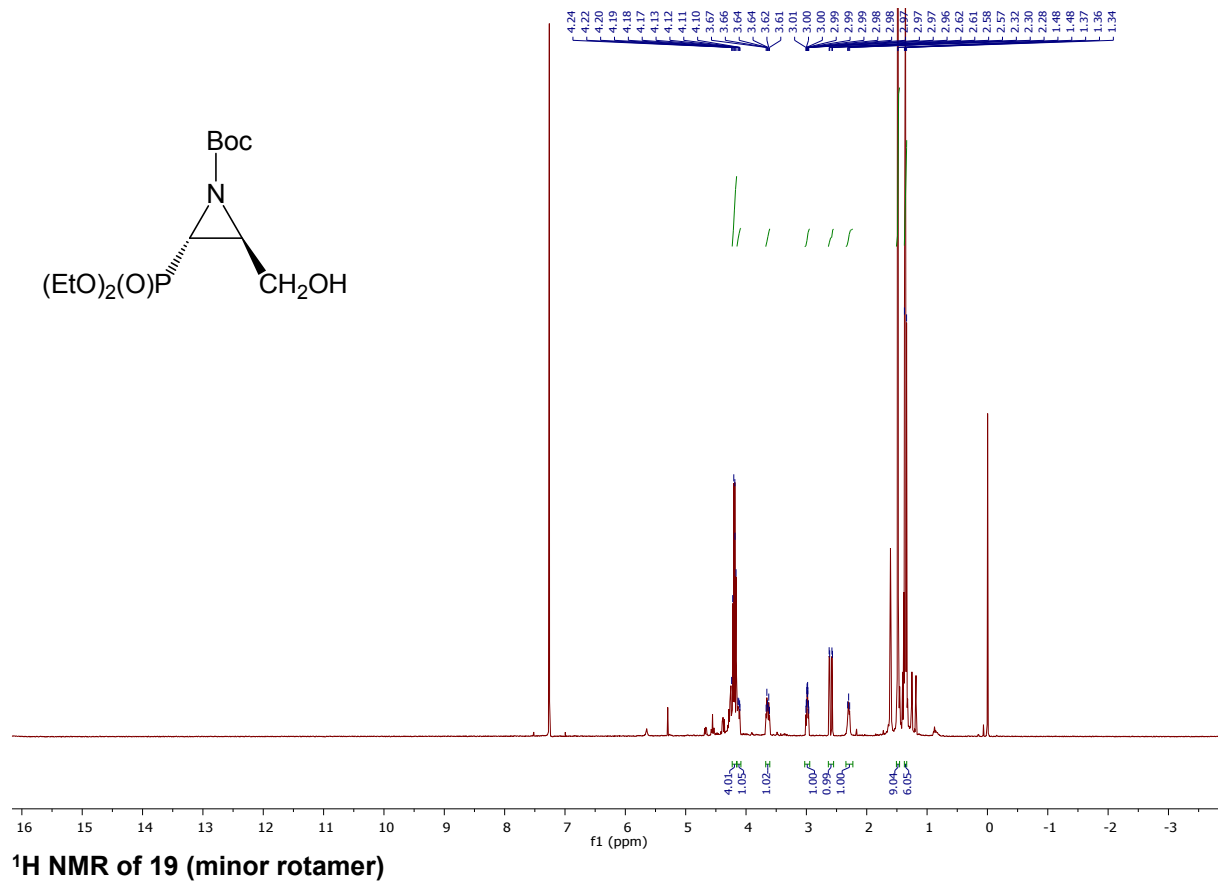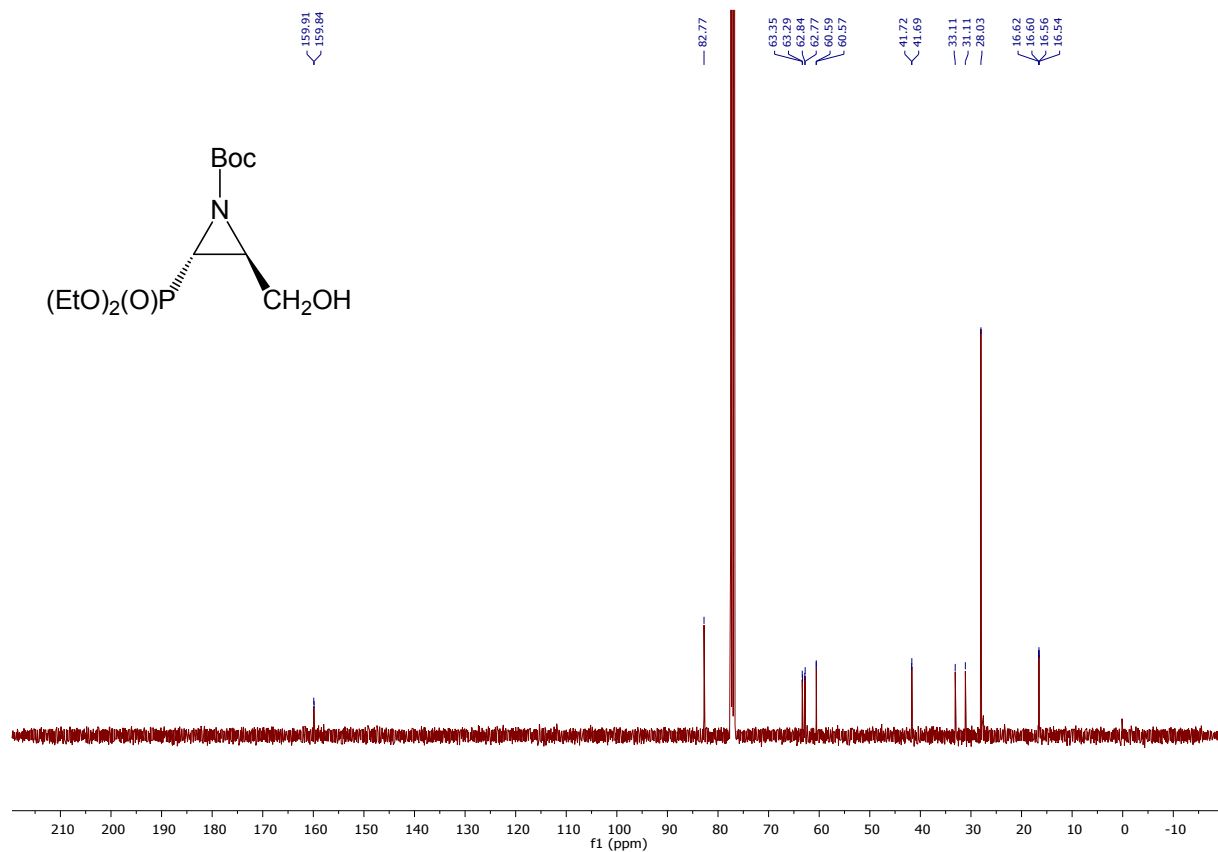

**<sup>13</sup>C NMR of 19 (minor rotamer)**

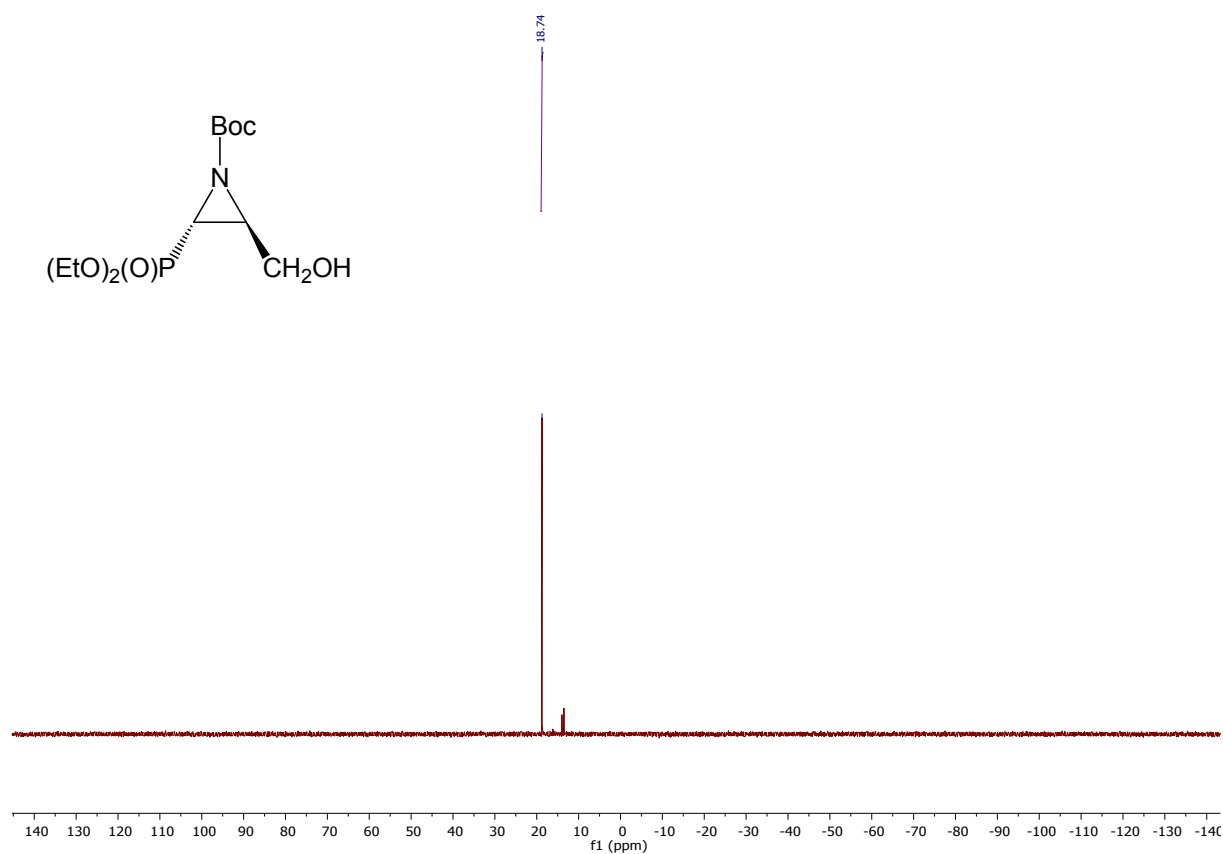

**<sup>31</sup>P{<sup>1</sup>H} NMR of 19 (minor rotamer)**

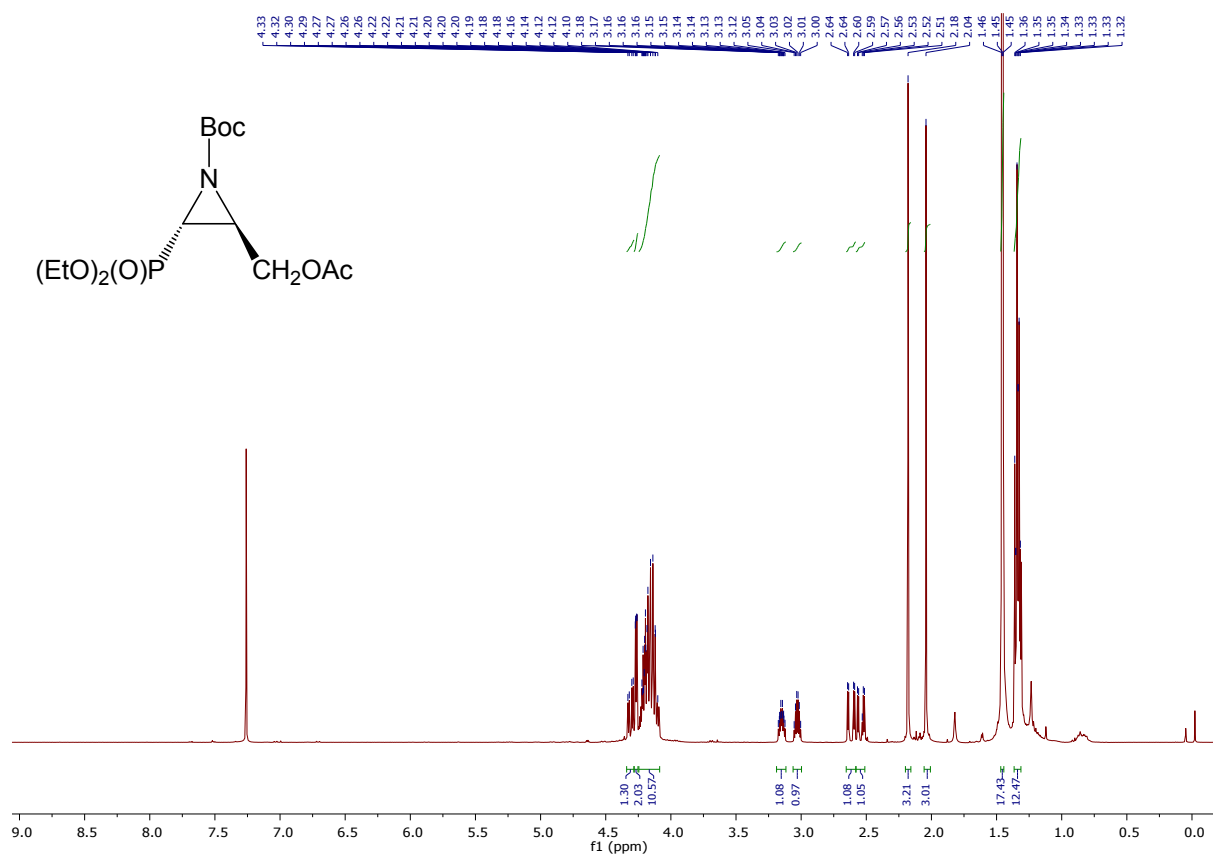

### <sup>1</sup>H NMR of 20 (1.1:1 rotamers ratio)

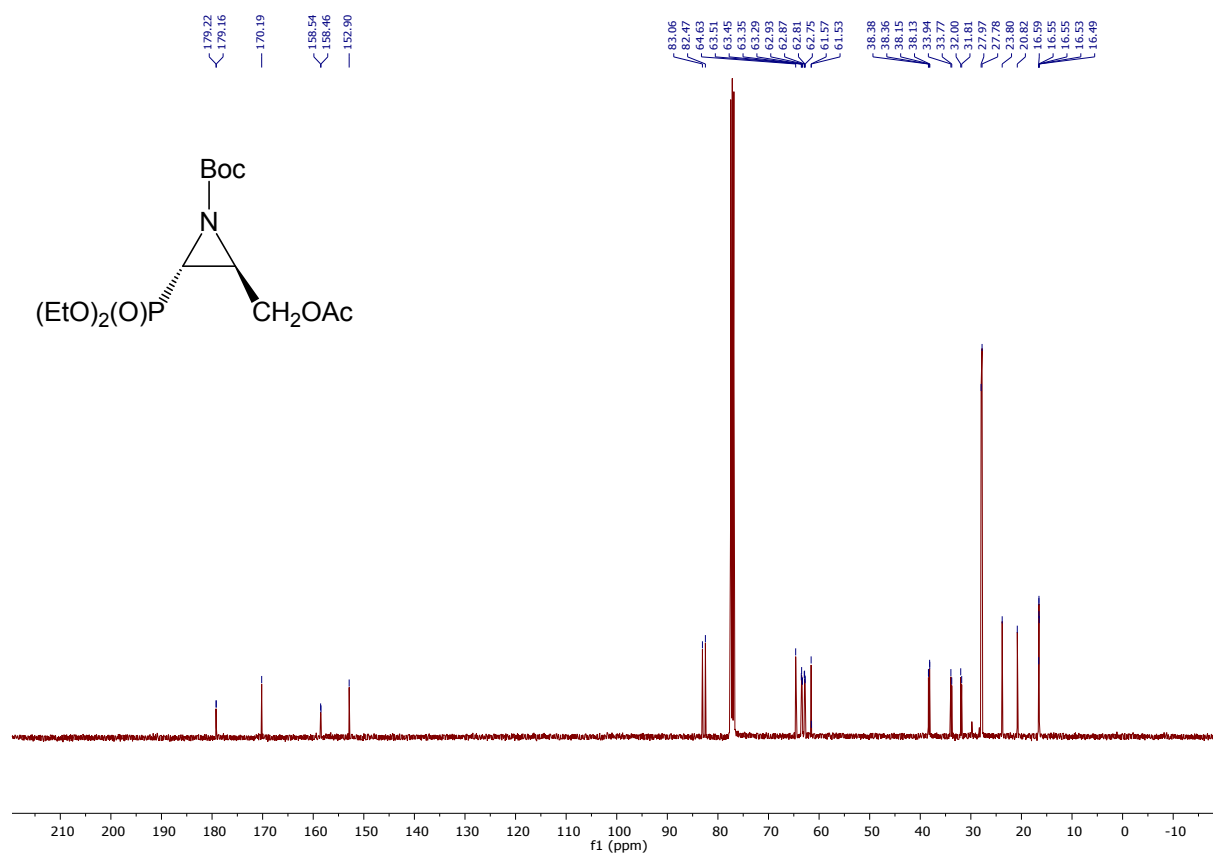

### <sup>13</sup>C NMR of 20 (1.1:1 rotamers ratio)

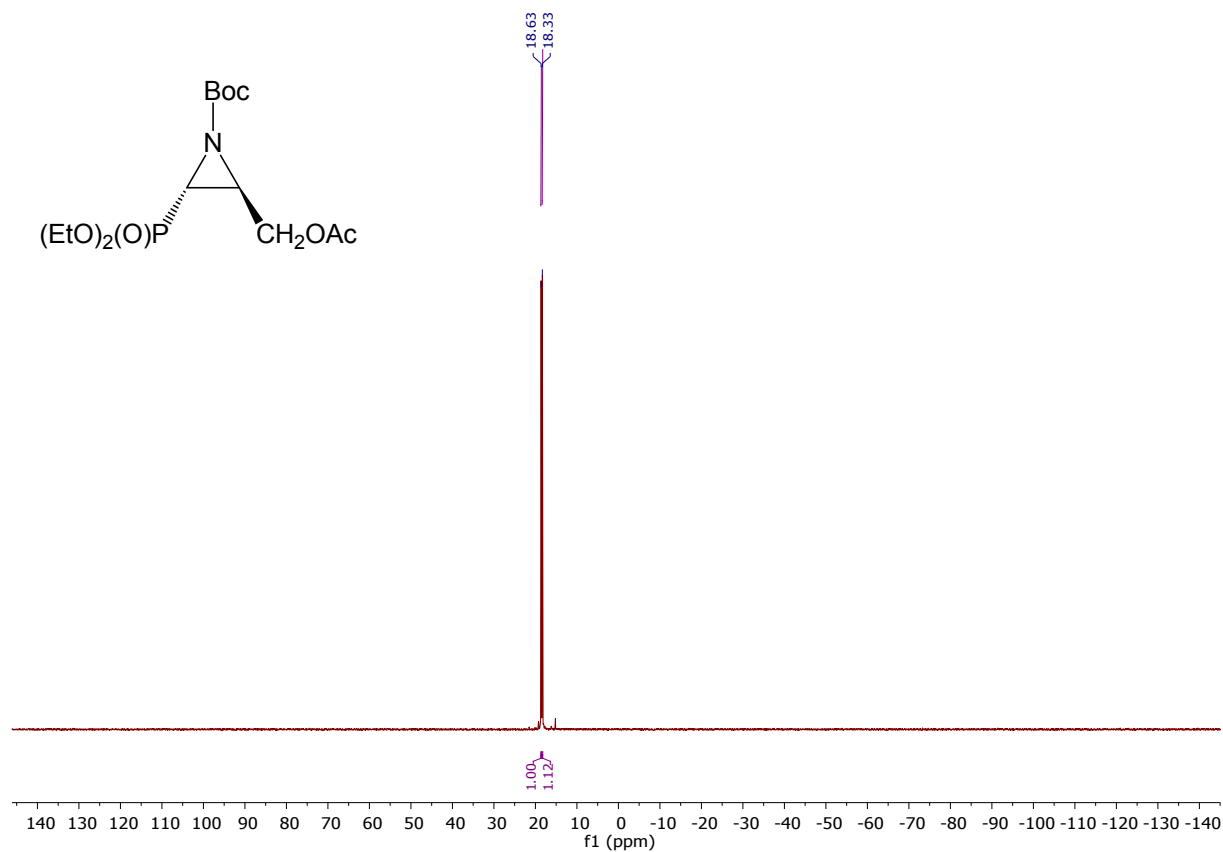

### <sup>31</sup>P{<sup>1</sup>H} NMR of 20 (1.1:1 rotamers ratio)

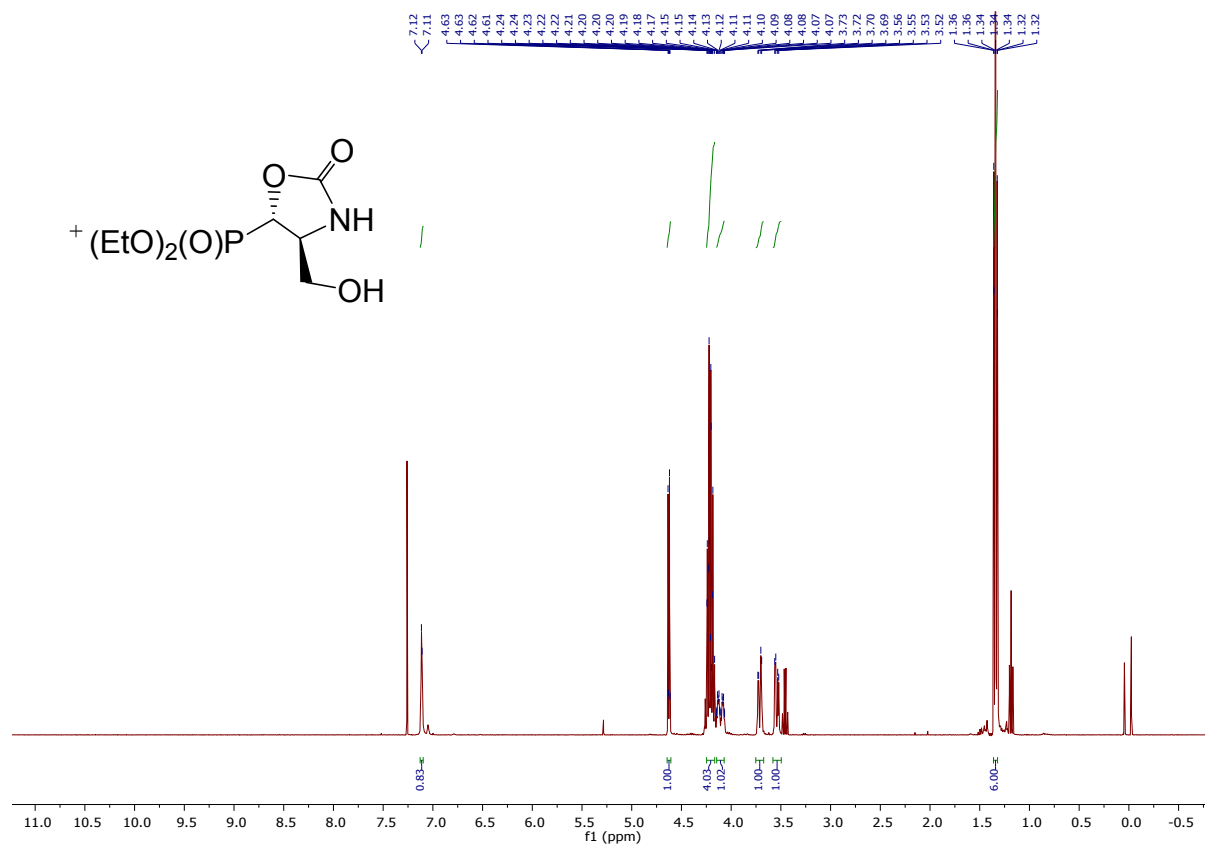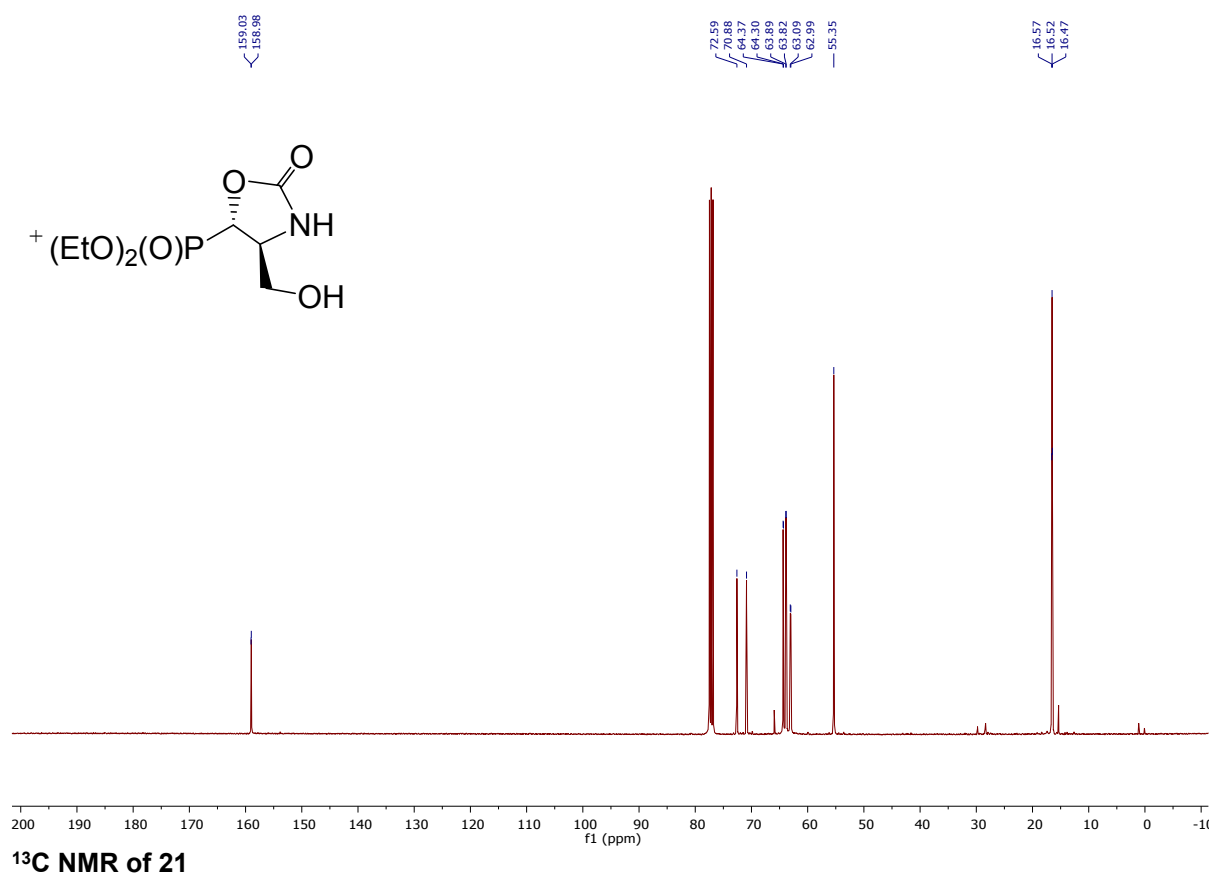

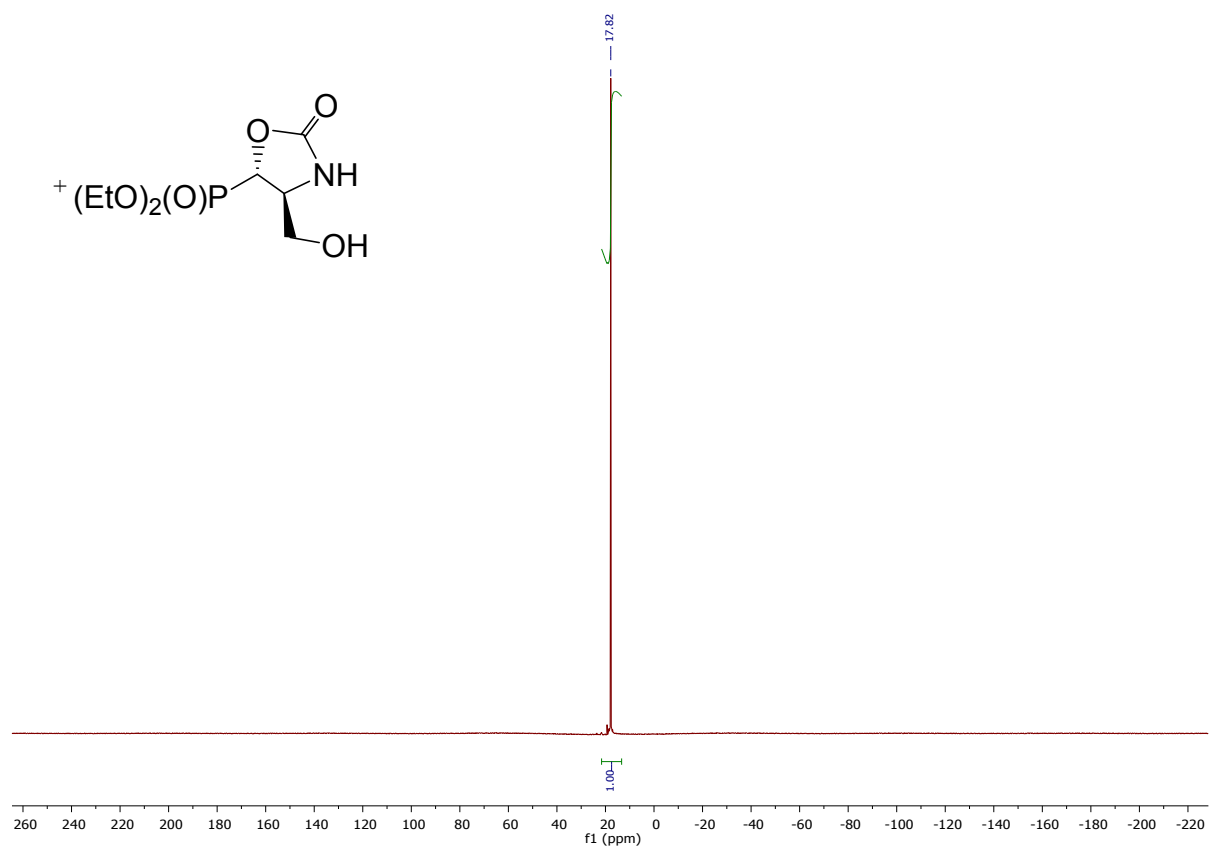

**$^{31}\text{P}\{^1\text{H}\}$  NMR of 21**

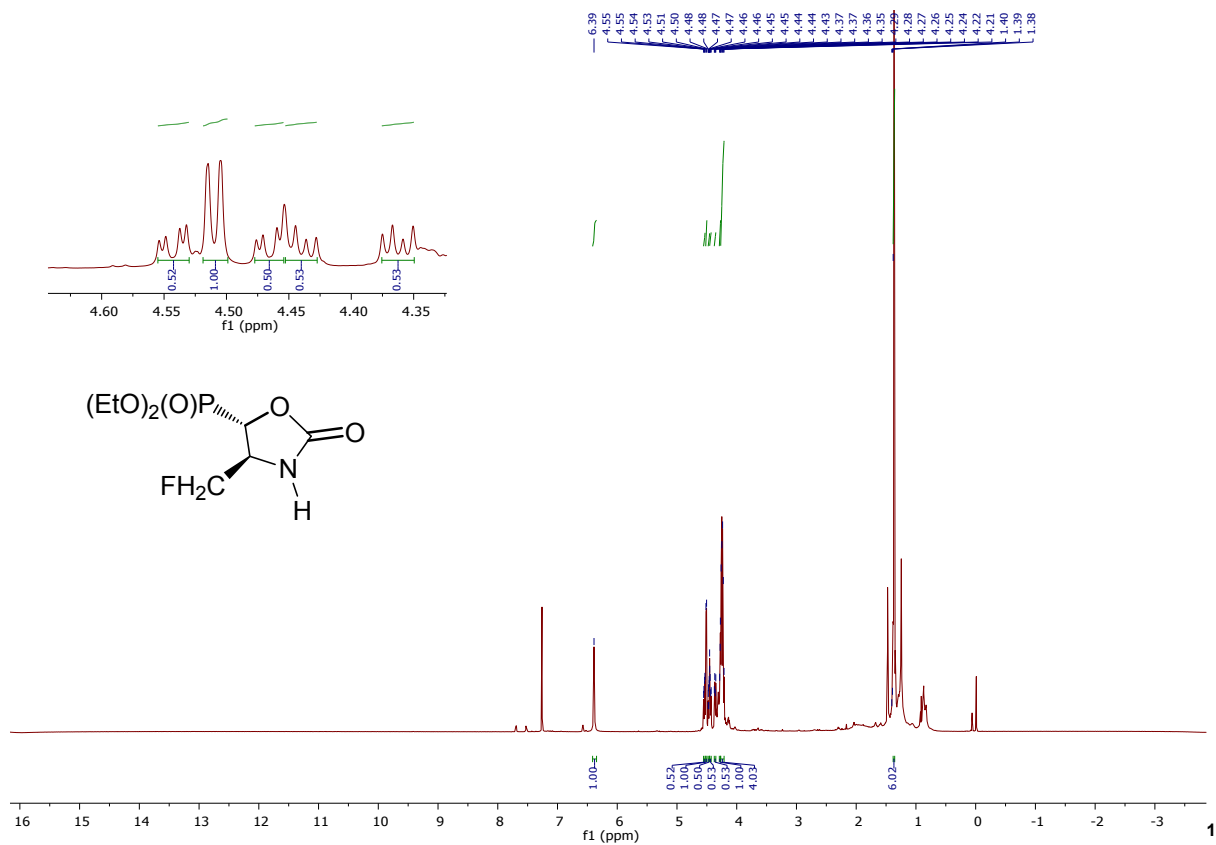

**H NMR of 22a**

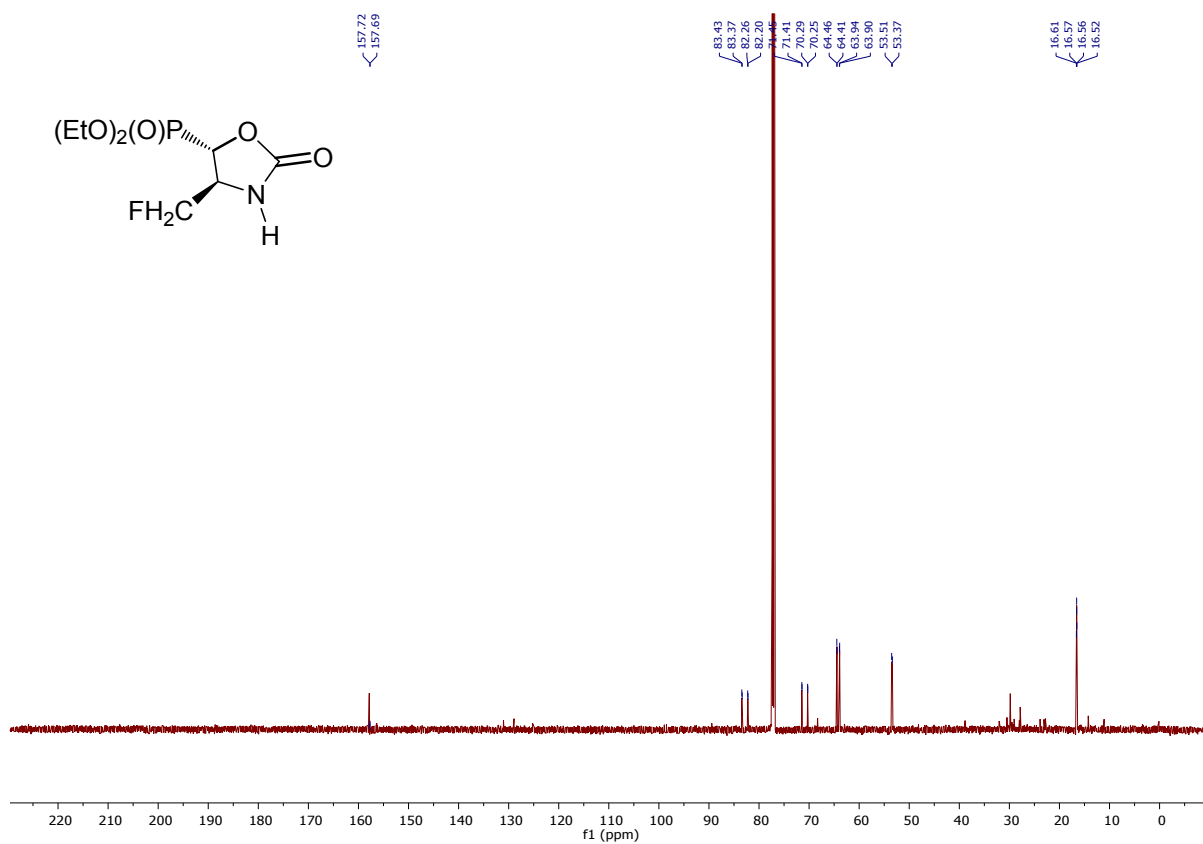

**<sup>13</sup>C NMR of 22a**

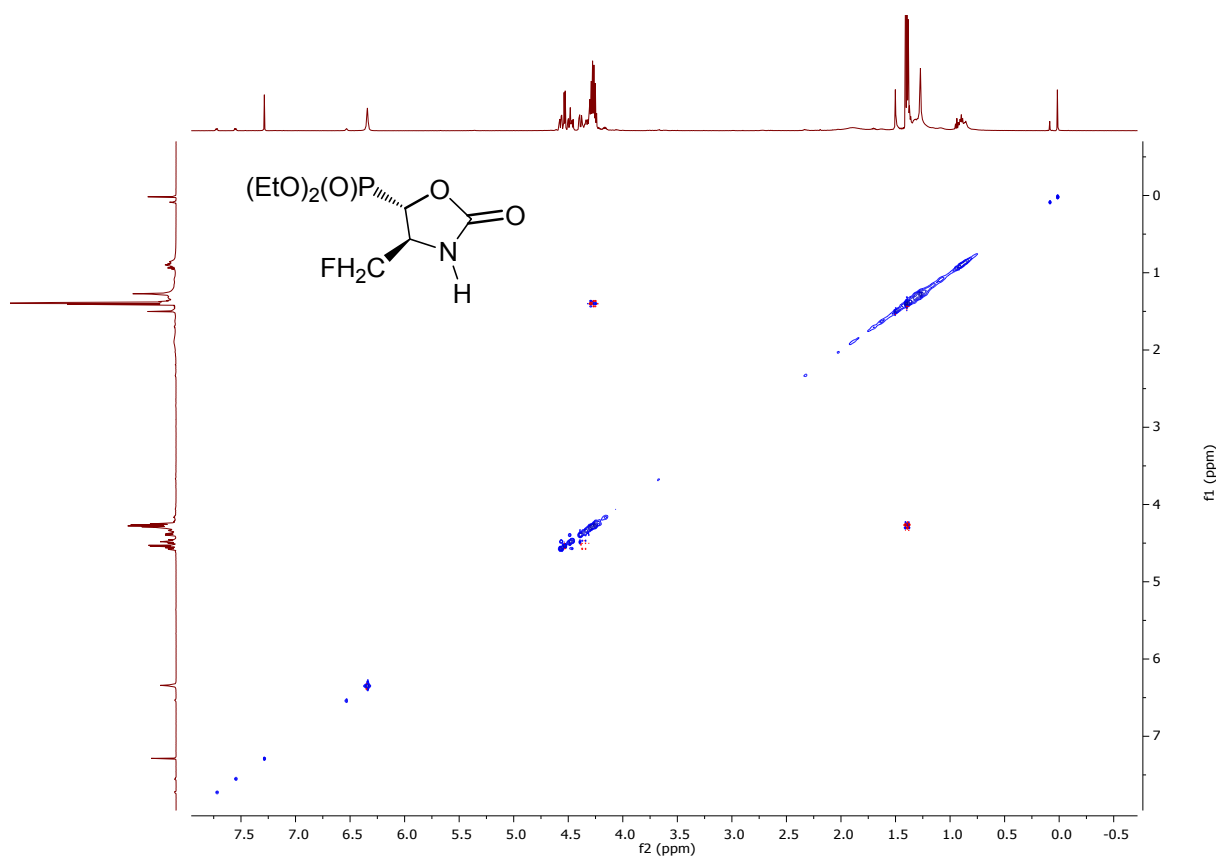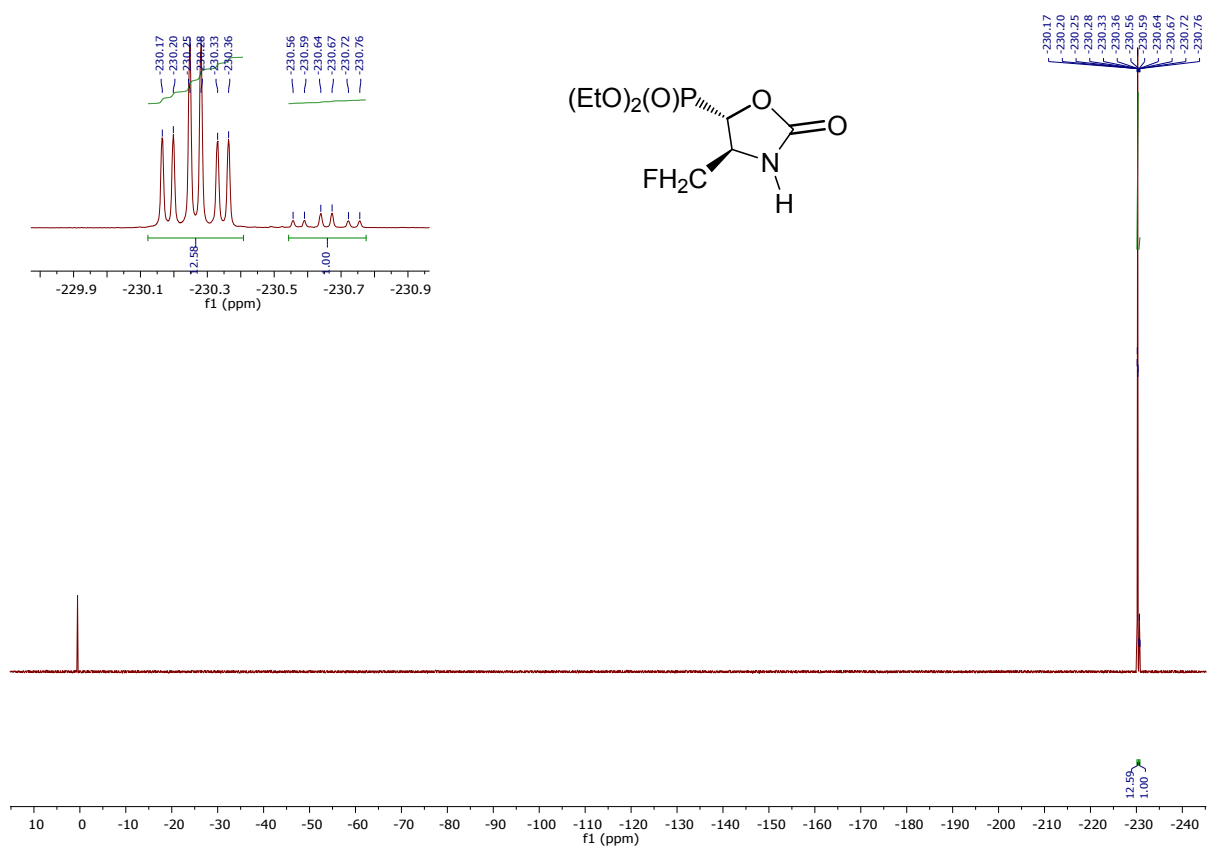



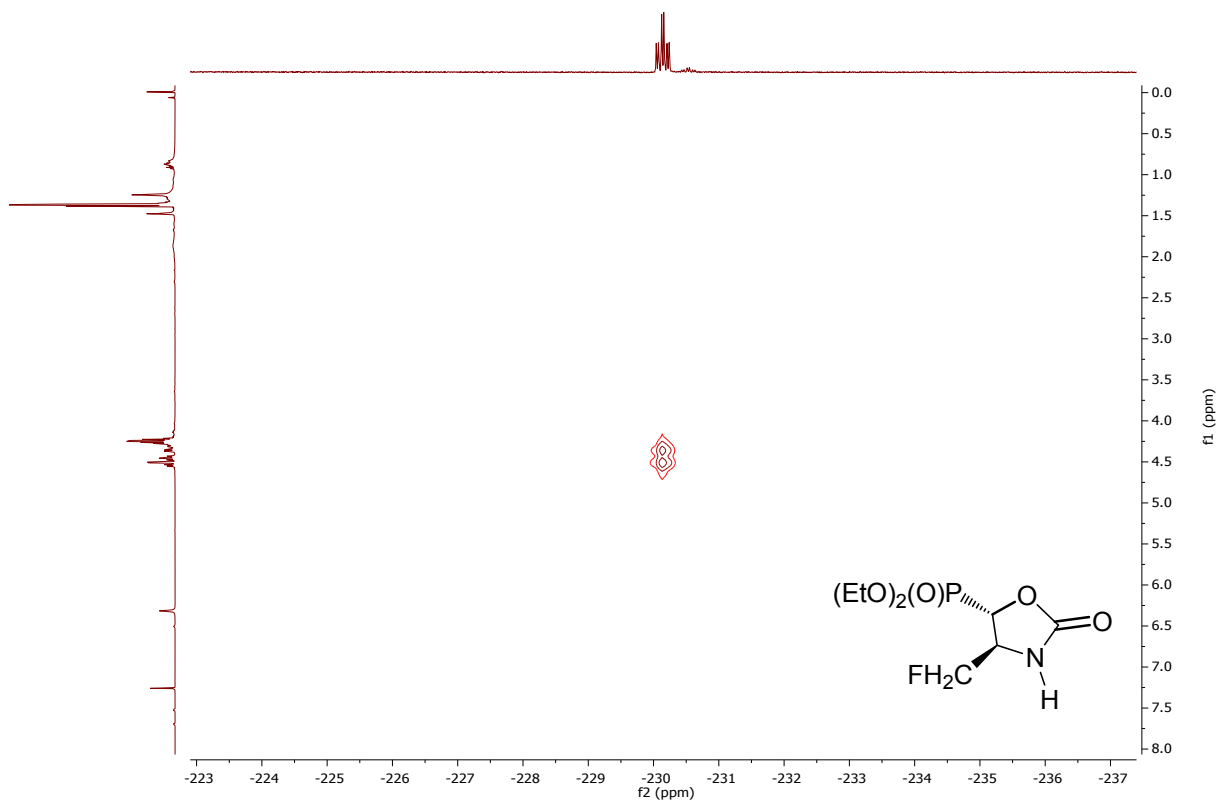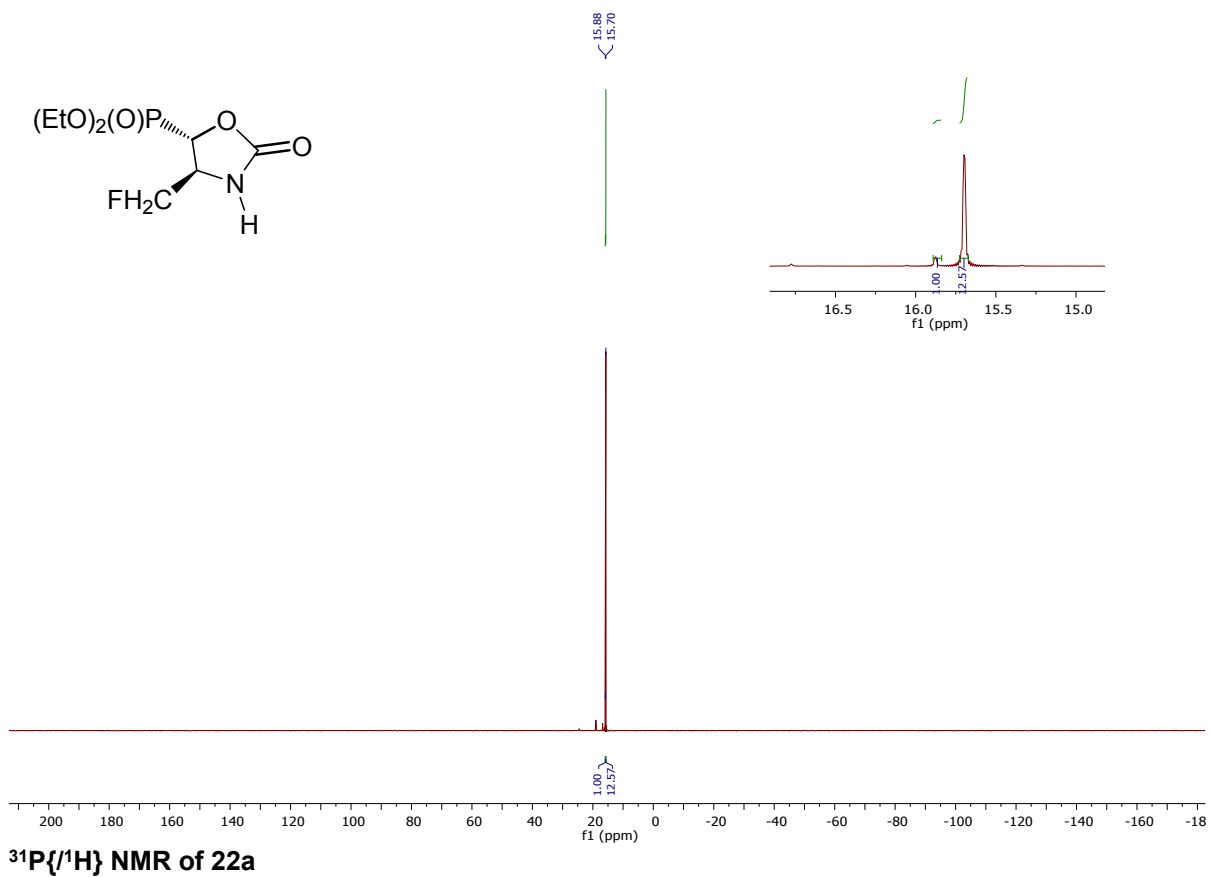

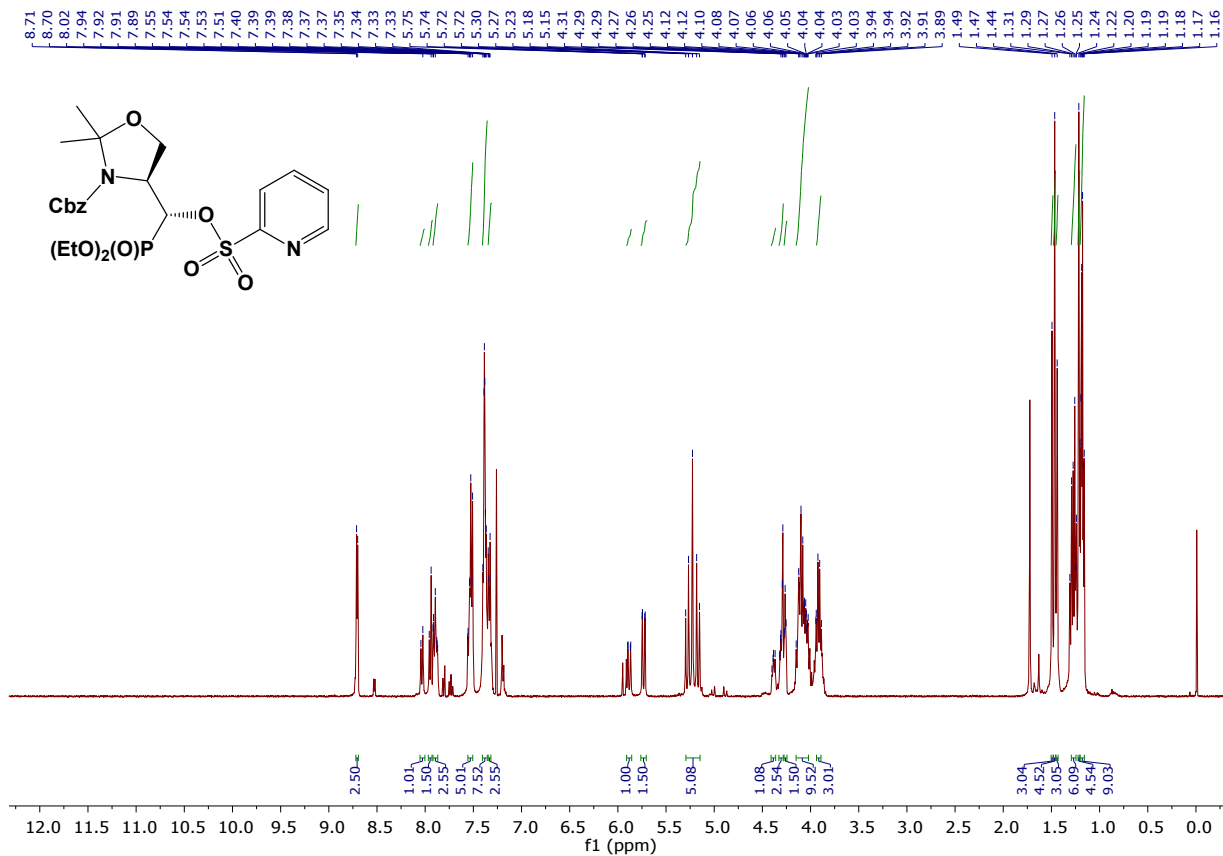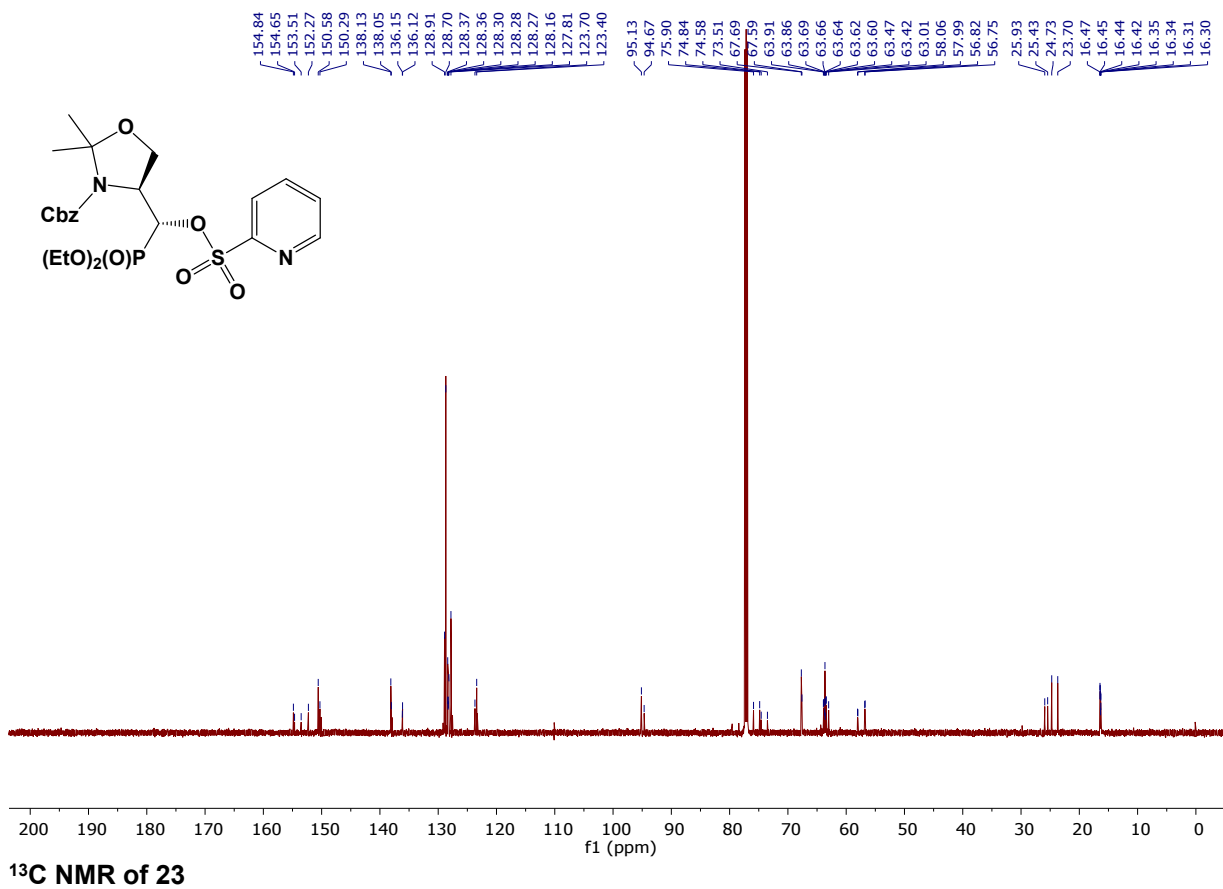

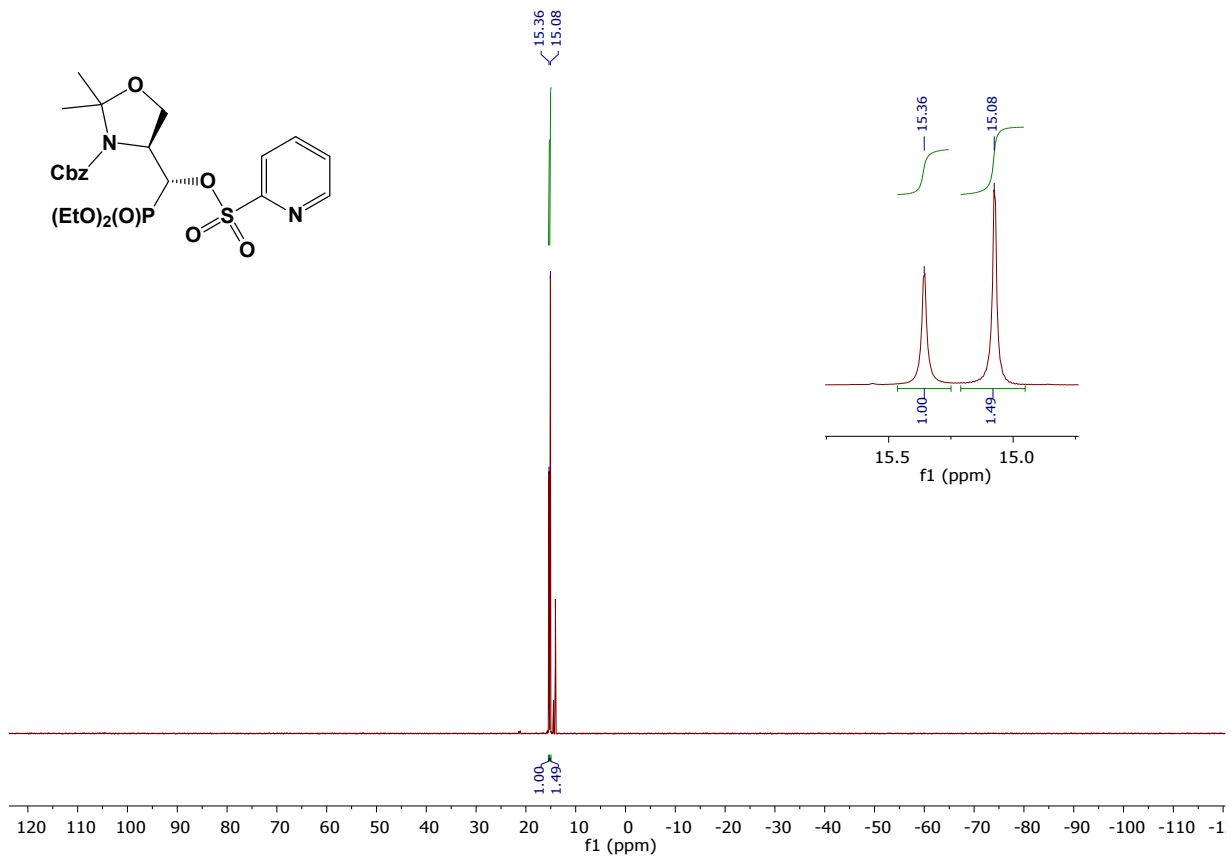

**<sup>31</sup>P{<sup>1</sup>H} NMR of 23**

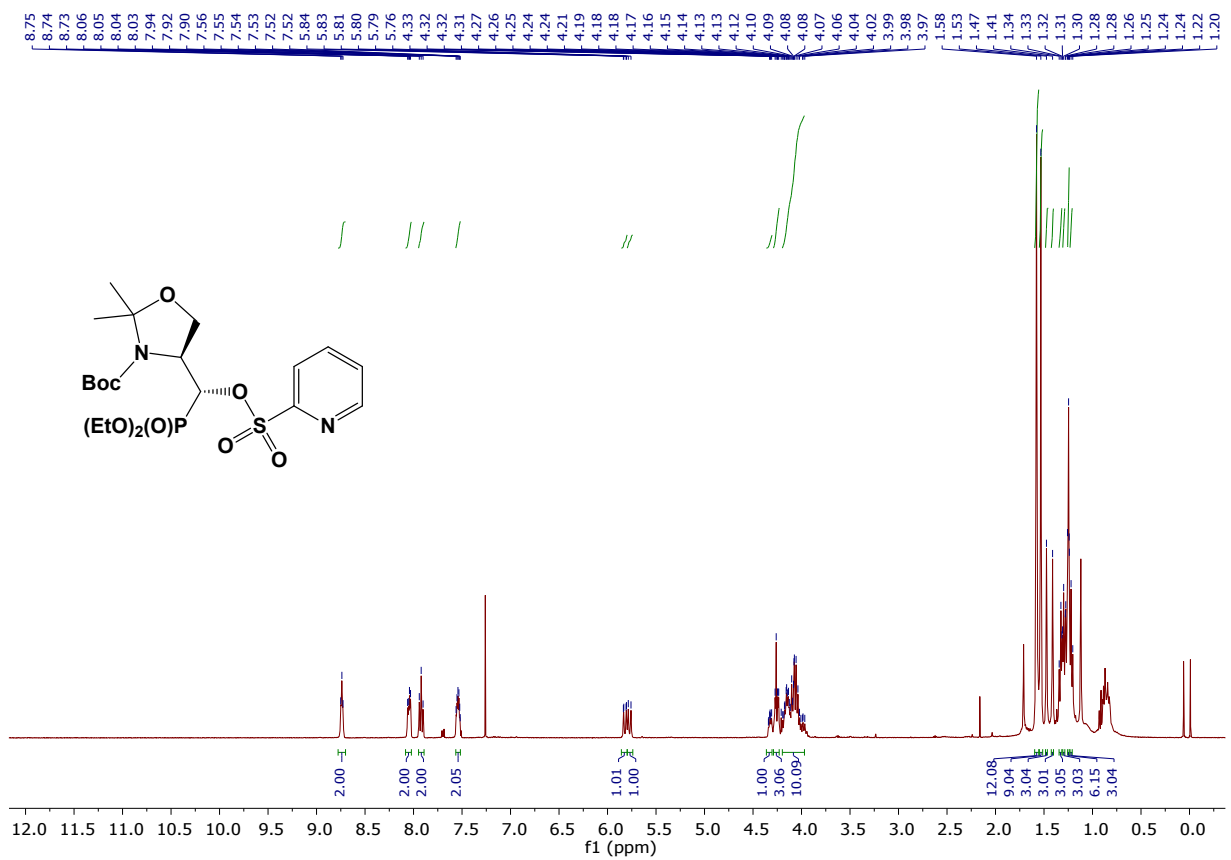

**<sup>1</sup>H NMR of 24**

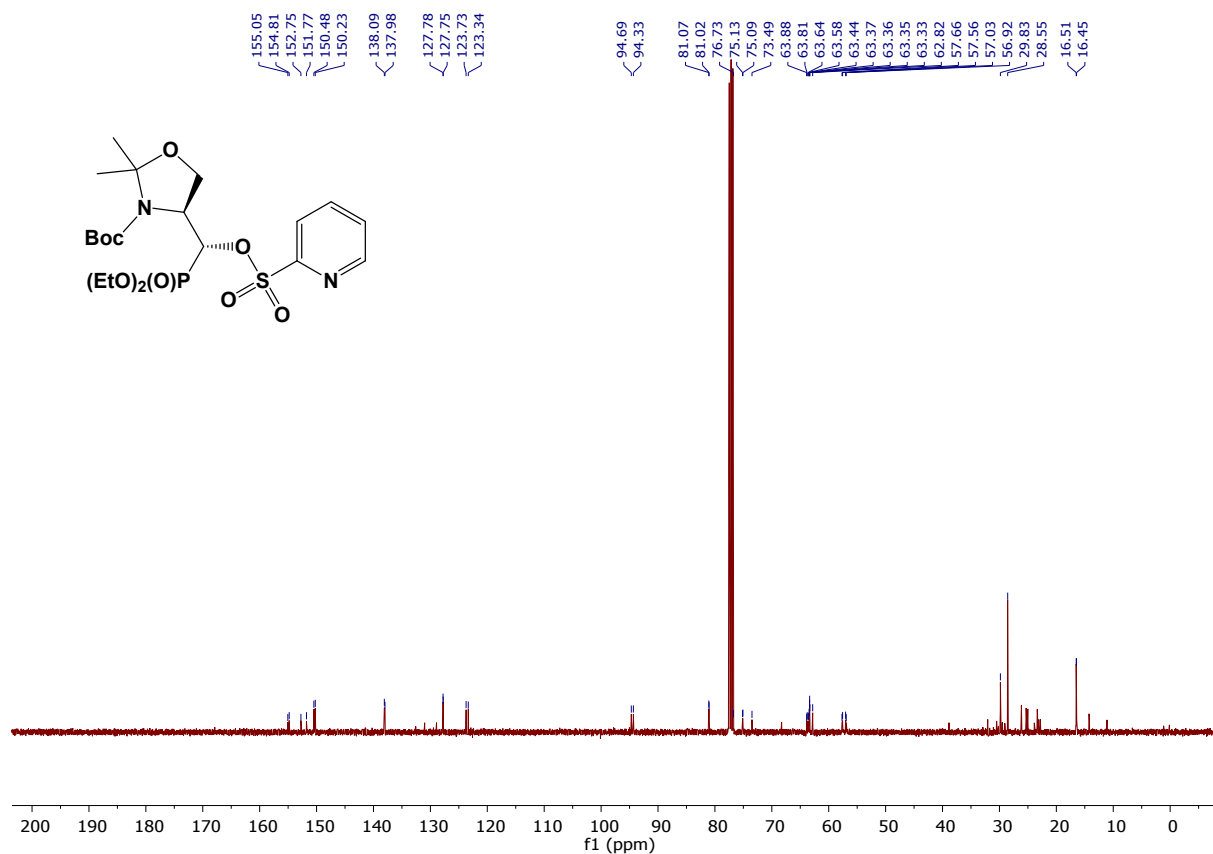

**<sup>31</sup>P{<sup>1</sup>H} NMR of 24**

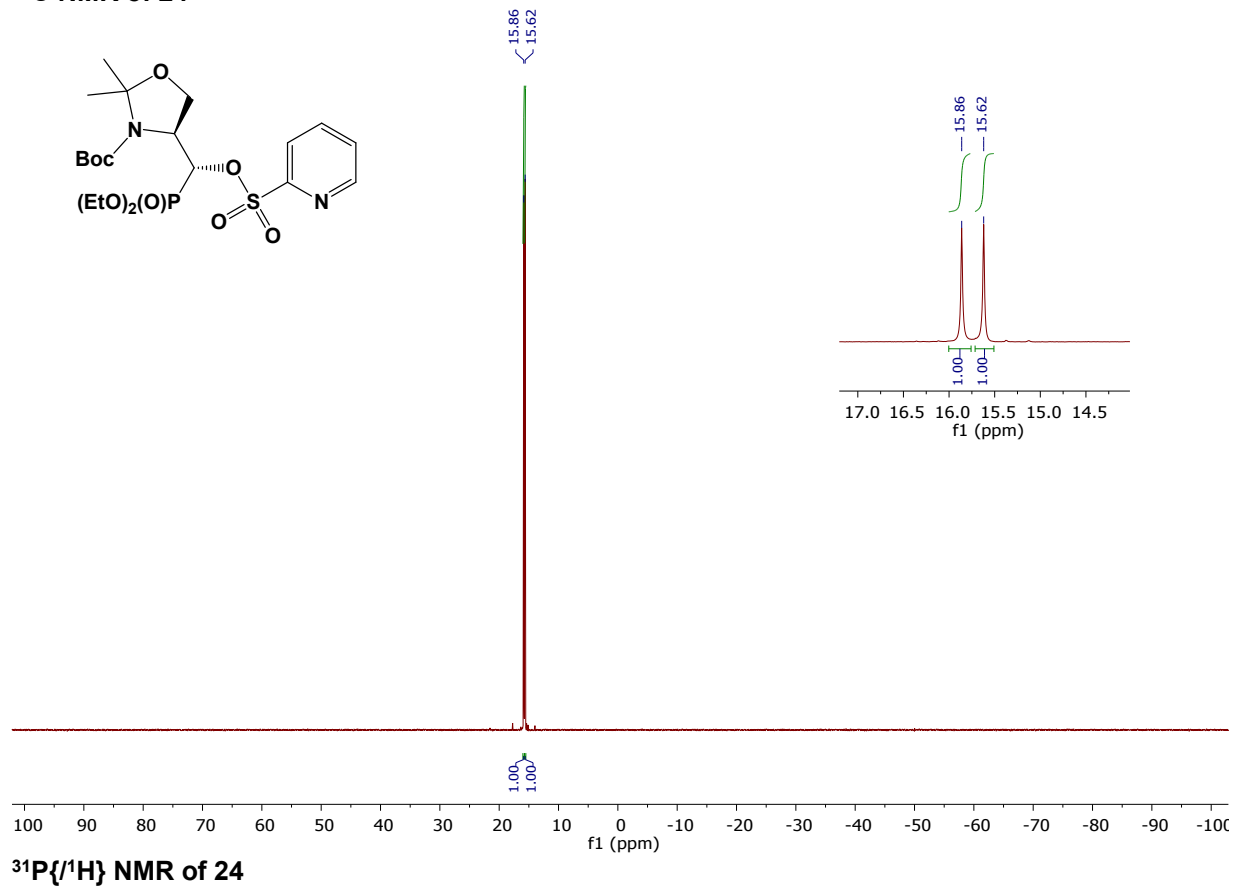

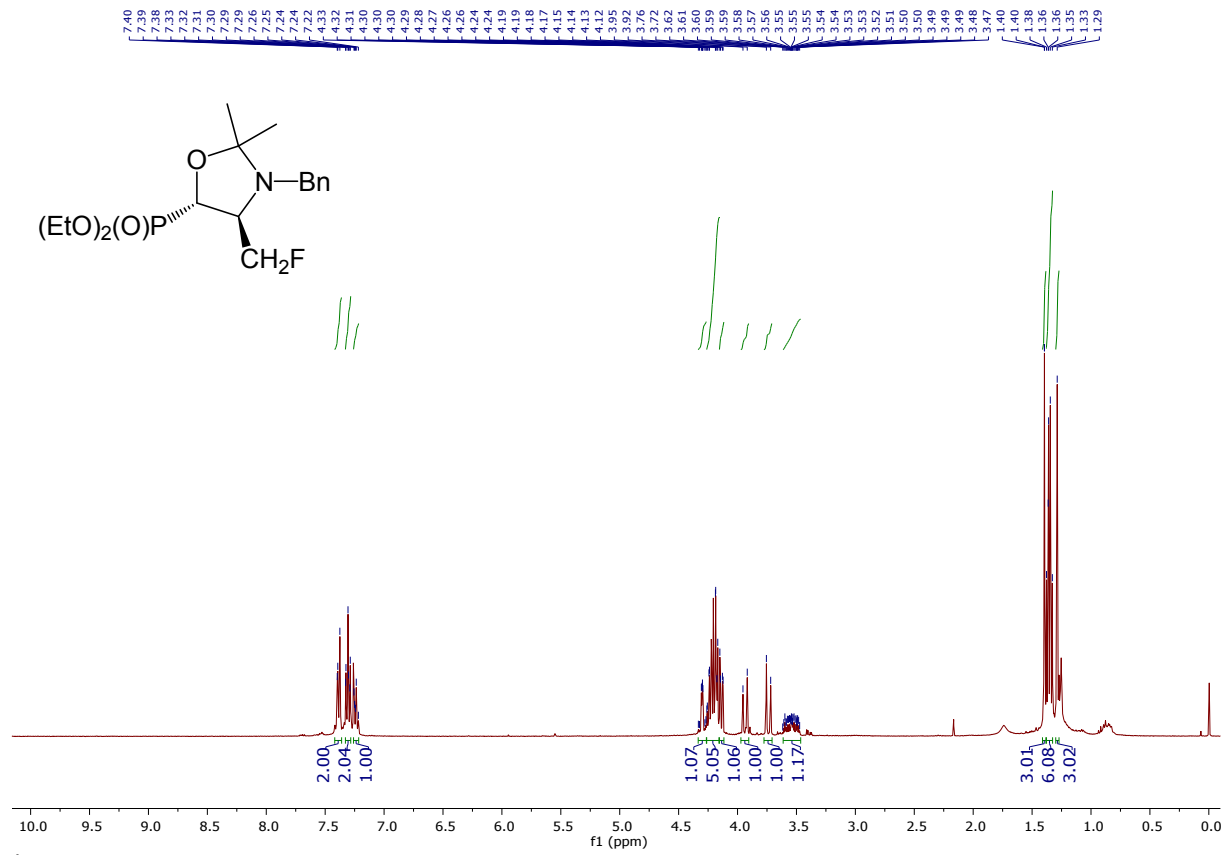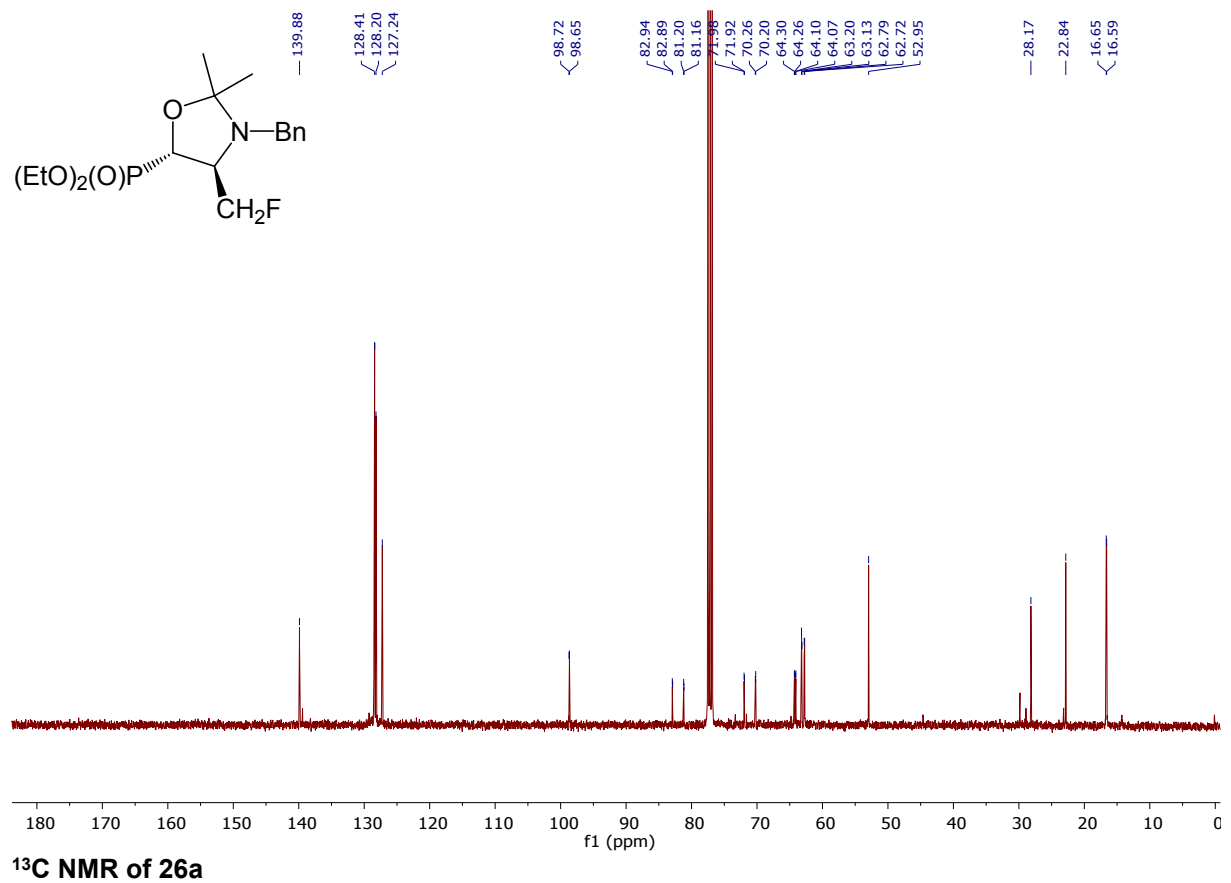

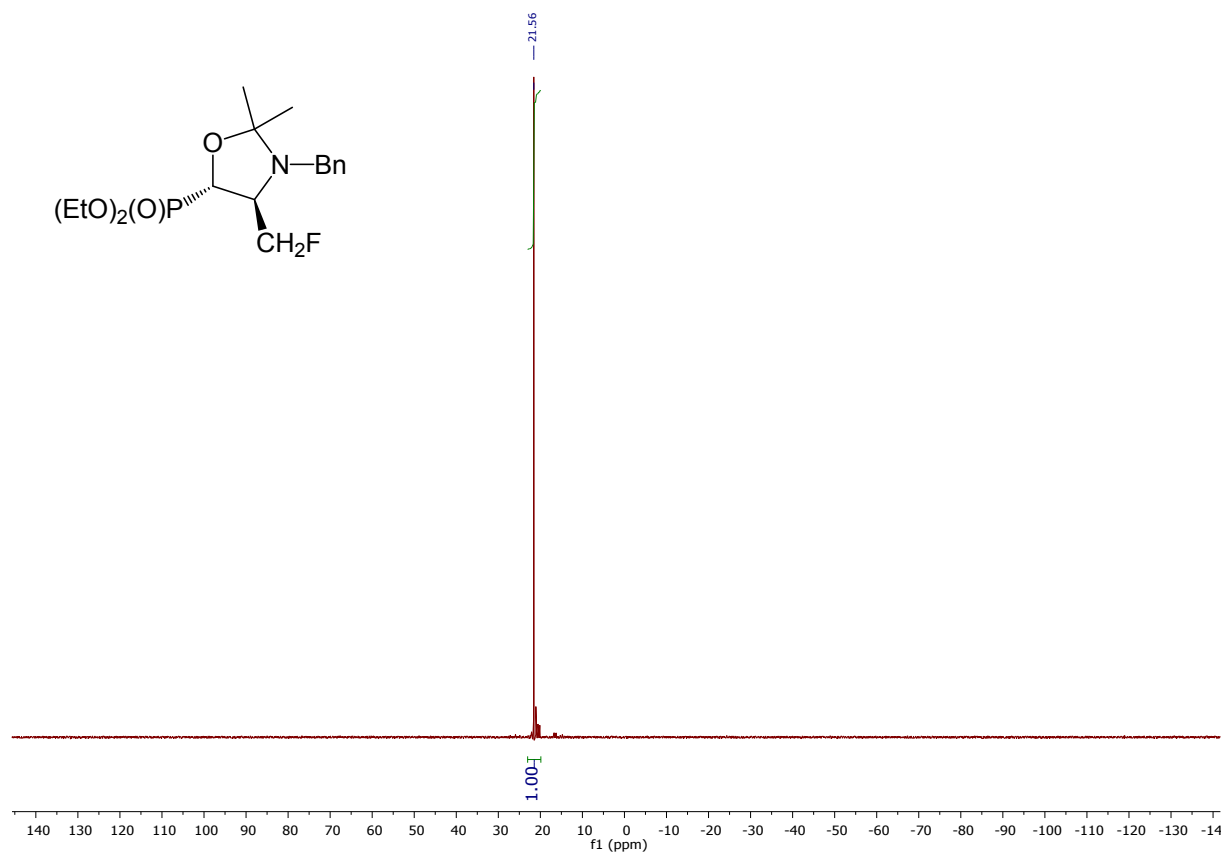

$^{31}\text{P}\{^1\text{H}\}$  NMR of 26a

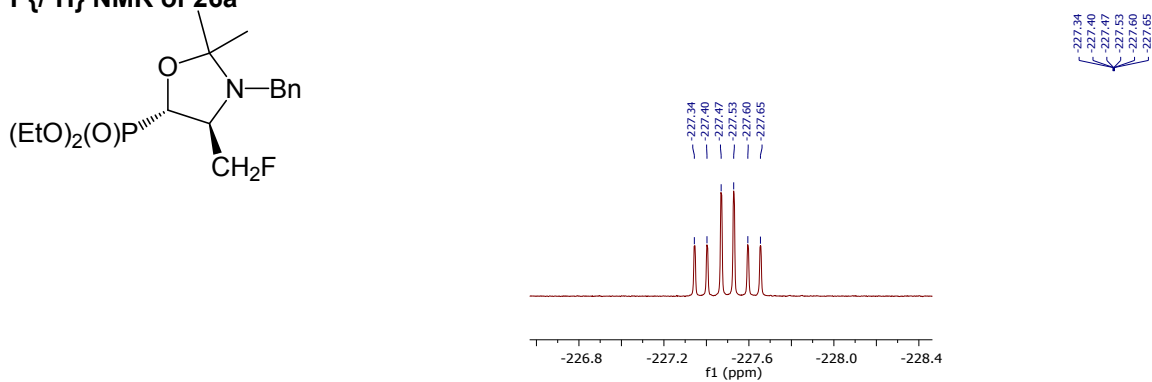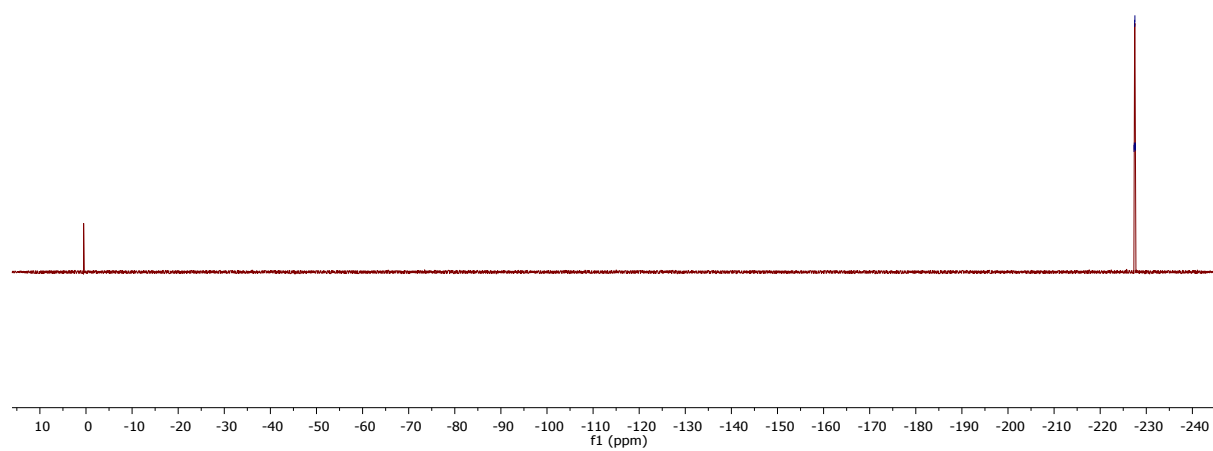

$^{19}\text{F}$  NMR of 26a

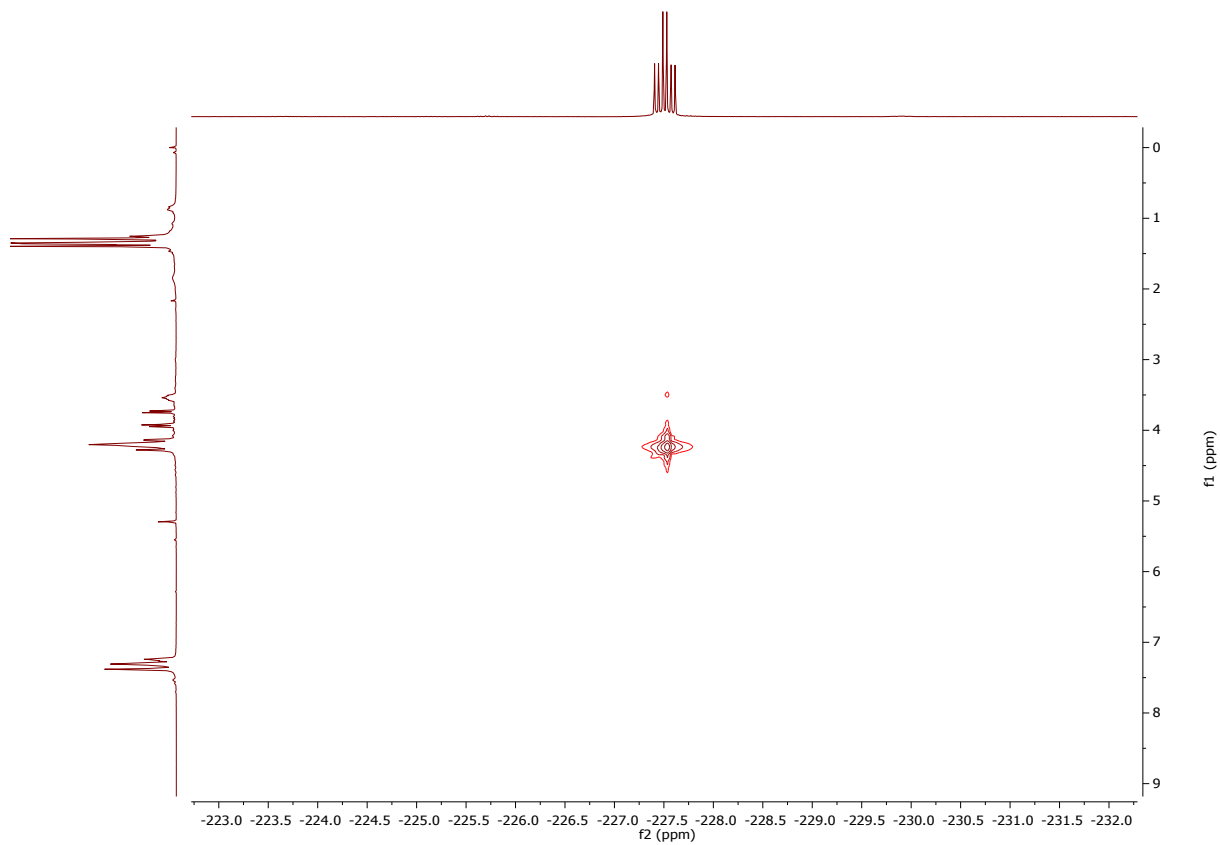

HOESY of 26a

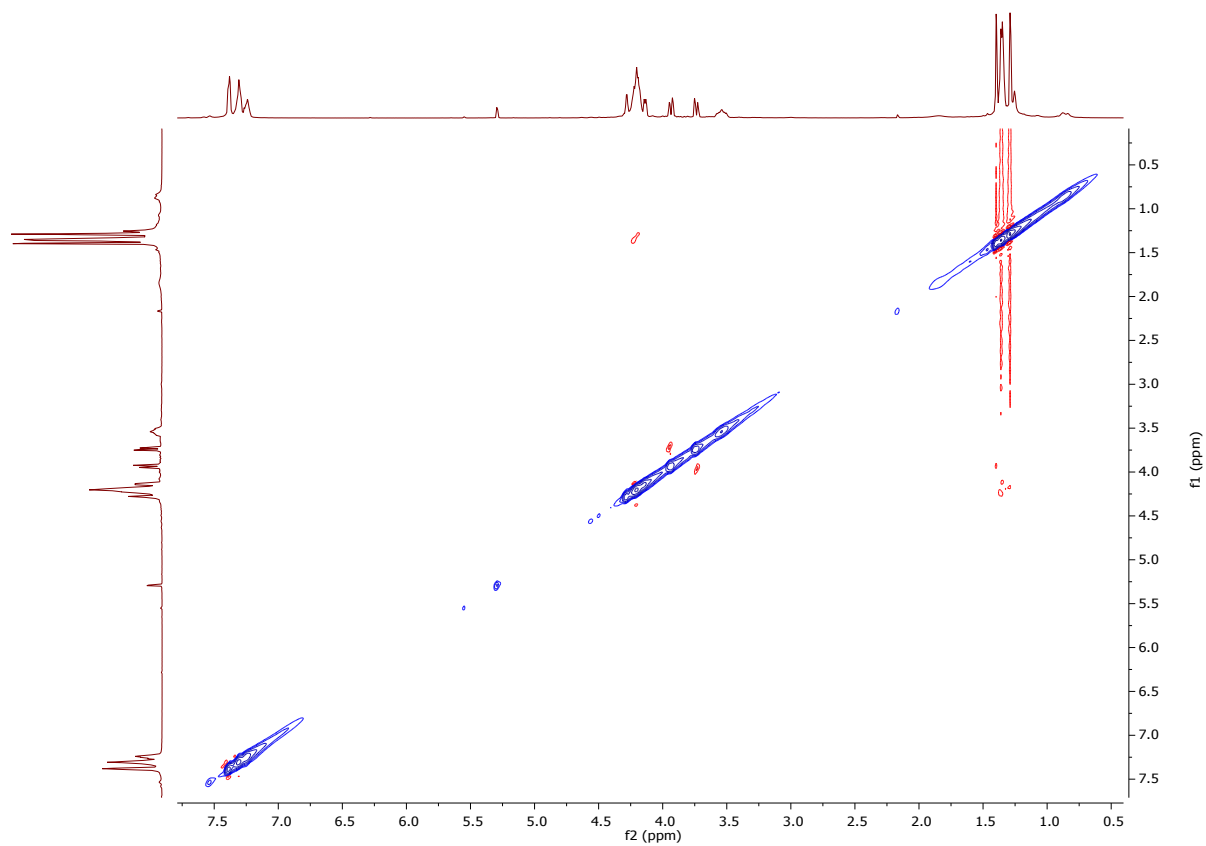

NOESY of 26a
